# Supplementary material
Source: PubMed Central journal article supplement (PMC6072348)
Supplement: MD-009-C8MD00022K-s001.pdf [file MD-009-C8MD00022K-s001.pdf]

## Design, Synthesis and Biological Evaluation of Novel 1,3-Diarylpyrazoles as Cyclooxygenase Inhibitors, Antiplatelet, and Anticancer Agents

Nazan Inceler<sup>a</sup>, Yesim Ozkan <sup>b</sup>, Nilüfer Nermin Turan<sup>c</sup>, Deniz Cansen Kahraman<sup>d</sup>, Rengul Cetin-Atalay<sup>d</sup>, Sultan Nacak Baytas<sup>a\*</sup>

<sup>a</sup> *Department of Pharmaceutical Chemistry, Faculty of Pharmacy, Gazi University, 06330, Ankara, Turkey*

<sup>b</sup> *Department of Biochemistry, Faculty of Pharmacy, Gazi University, 06330, Ankara, Turkey*

<sup>c</sup> *Department of Pharmacology, Faculty of Pharmacy, Gazi University, 06330, Ankara, Turkey*

<sup>d</sup> *Cancer Systems Biology Laboratory, Graduate School of Informatics, METU, 06800, Ankara, Turkey*

**Correspondence:** Prof. Sultan Nacak Baytas

Division of Pharmaceutical Sciences, Department of Pharmaceutical Chemistry, Faculty of Pharmacy, Gazi University, 06330 Etiler, Ankara-TURKEY;

E-mail: [baytas@gazi.edu.tr](mailto:baytas@gazi.edu.tr); Fax: +90 (312) 223 5018

| Figures                                                       | Page |
|---------------------------------------------------------------|------|
| <b>Figure S1.</b> Spectral data of Compound <b>2a</b> .....   | 5    |
| <b>Figure S2.</b> Spectral data of Compound <b>2b</b> .....   | 5    |
| <b>Figure S3.</b> Spectral data of Compound <b>7</b> .....    | 6    |
| <b>Figure S4.</b> Spectral data of Compound <b>3a</b> .....   | 6    |
| <b>Figure S5.</b> Spectral data of Compound <b>3b</b> .....   | 7    |
| <b>Figure S6.</b> Spectral data of Compound <b>8</b> .....    | 8    |
| <b>Figure S7.</b> Spectral data of Compound <b>4a</b> .....   | 9    |
| <b>Figure S8.</b> Spectral data of Compound <b>4b</b> .....   | 9    |
| <b>Figure S9.</b> Spectral data of Compound <b>9</b> .....    | 11   |
| <b>Figure S10.</b> Spectral data of Compound <b>5a</b> .....  | 11   |
| <b>Figure S11.</b> Spectral data of Compound <b>5b</b> .....  | 13   |
| <b>Figure S12.</b> Spectral data of Compound <b>5c</b> .....  | 14   |
| <b>Figure S13.</b> Spectral data of Compound <b>5d</b> .....  | 16   |
| <b>Figure S14.</b> Spectral data of Compound <b>5e</b> .....  | 17   |
| <b>Figure S15.</b> Spectral data of Compound <b>5f</b> .....  | 19   |
| <b>Figure S16.</b> Spectral data of Compound <b>5g</b> .....  | 20   |
| <b>Figure S17.</b> Spectral data of Compound <b>5h</b> .....  | 22   |
| <b>Figure S18.</b> Spectral data of Compound <b>5i</b> .....  | 23   |
| <b>Figure S19.</b> Spectral data of Compound <b>5j</b> .....  | 25   |
| <b>Figure S20.</b> Spectral data of Compound <b>5k</b> .....  | 26   |
| <b>Figure S21.</b> Spectral data of Compound <b>5l</b> .....  | 28   |
| <b>Figure S22.</b> Spectral data of Compound <b>5m</b> .....  | 29   |
| <b>Figure S23.</b> Spectral data of Compound <b>5n</b> .....  | 31   |
| <b>Figure S24.</b> Spectral data of Compound <b>5o</b> .....  | 32   |
| <b>Figure S25.</b> Spectral data of Compound <b>5p</b> .....  | 33   |
| <b>Figure S26.</b> Spectral data of Compound <b>5r</b> .....  | 35   |
| <b>Figure S27.</b> Spectral data of Compound <b>5s</b> .....  | 37   |
| <b>Figure S28.</b> Spectral data of Compound <b>10a</b> ..... | 38   |
| <b>Figure S29.</b> Spectral data of Compound <b>10b</b> ..... | 40   |
| <b>Figure S30.</b> Spectral data of Compound <b>10c</b> ..... | 42   |
| <b>Figure S31.</b> Spectral data of Compound <b>10d</b> ..... | 43   |
| <b>Figure S32.</b> Spectral data of Compound <b>10e</b> ..... | 45   |
| <b>Figure S33.</b> Spectral data of Compound <b>10f</b> ..... | 46   |
| <b>Figure S34.</b> Spectral data of Compound <b>10g</b> ..... | 48   |
| <b>Figure S35.</b> Spectral data of Compound <b>10h</b> ..... | 49   |
| <b>Figure S36.</b> Spectral data of Compound <b>10i</b> ..... | 51   |

### **General procedure for the preparation of 3/4-[(1E)-1-(2-phenylhydraziniliden)ethyl] pyridine derivatives (2a, 7)**

A solution of acetylpyridine derivative (0.052 mol), phenyl hydrazine (6.27 g, 0.058 mol) and acetic acid (2 ml, 0.035 mol) in ethanol was stirred for 2 hat reflux, and then evaporated. The precipitated was filtered off and dried.

#### **N-Phenyl-N'-(1-pyridine-3-il-ethyliden)hydrazine 2a**

Yield %90, mp 138.8 – 140 °C [1]. IR (FTIR/FTNIR-ATR): 3169 cm<sup>-1</sup> (N-H), 2993 cm<sup>-1</sup> (aliphatic C-H). <sup>1</sup>H-NMR (CDCl<sub>3</sub>) δ: 8.98 (1H, d, *J*=2.4 Hz), 8.53 (1H, dd, *J*=1.6 Hz, 4.8 Hz), 8.10 (1H, dt, *J*=2 Hz, 8 Hz), 7.47 (1H, s), 7.31-7.26 (3H, m), 7.18 (2H, d, *J*=7.2 Hz), 6.91 (1H, t, *J*=7.2 Hz), 2.26 (3H, s). HRMS C<sub>13</sub>H<sub>14</sub>N<sub>3</sub> [M+H]<sup>+</sup> *Calc.* 212.1188, Found *m/z* 212.1187. Anal. *Calc.* (%) for C<sub>13</sub>H<sub>13</sub>N<sub>3</sub> *Calc.* % C: 73.91 H: 6.20 N: 19.89, Found % C: 74.27 H: 6.08 N: 19.60.

#### **4-(1-(2-phenylhydrazono)ethyl)pyridine 7**

Yield 85%, mp 147°C (Lit. Mp. [1, 2]: 148-149 °C). IR (FTIR/FTNIR-ATR): 3227 cm<sup>-1</sup> (N-H), 1941 cm<sup>-1</sup> (C=N). <sup>1</sup>H-NMR (CDCl<sub>3</sub>) δ: 8.58-8.60 (2H, d, *J*=6.4 Hz), 7.65 (2H, d, *J*=6 Hz), 7.59 (1H, s), 7.29-7.33 (2H, t, *J*=7.6 Hz), 7.19-7.22 (2H, d, *J*=7.6 Hz), 6.92-6.95 (1H, m, *J*=6.8 Hz, *J*=7.6 Hz), 2.22 (3H, s). HRMS C<sub>13</sub>H<sub>14</sub>N<sub>3</sub> [M+H]<sup>+</sup> *Calc.* 212.1188, Found *m/z* 212.1180. Anal. *Calc.* (%) for C<sub>13</sub>H<sub>13</sub>N<sub>3</sub>. C: 73.91 H: 6.20 N: 19.89, Found C: 74.21 H: 6.22 N: 19.38.

### **General procedure for the preparation of 1-phenyl-3-(pyridine-3/4-yl)-1H-pyrazole-4-carbaldehyde derivatives (3a,8)**

In a dry flask, phosphoroxly chloride (POCl<sub>3</sub>) (0.124 mol) was added drop wise to an ice-cold stirred solution of hydrazon derivative (0.041 mol) in 80 ml DMF. The reaction mixture was allowed to attain room temperature, and then heated at 50 °C for 4 h. The resulting mixture was poured onto crushed ice, neutralized with dilute NaOH and left overnight. The yellow precipitate obtained was purified by crystallization in toluene.

#### **1-Phenyl-3-(pyridine-3-yl)-1H-pyrazole-4-carbaldehyde 3a**

Yield %85, mp 158.8–160 °C [1]. IR (FTIR/FTNIR-ATR): 1673 cm<sup>-1</sup> (C=O). <sup>1</sup>H-NMR (CDCl<sub>3</sub>) δ: 10.06 (1H, s), 9.12 (1H, d, *J*=2.4 Hz), 8.70 (1H, dd, *J*<sub>a</sub>=1.6 Hz, *J*<sub>b</sub>=4.8 Hz), 8.58 (1H, s), 8.47 (1H, dt, *J*<sub>a</sub>=2 Hz, *J*<sub>b</sub>=8 Hz), 7.81 (2H, d, *J*=7.6 Hz), 7.56-7.52 (2H, m), 7.46-7.41 (2H, m). HRMS C<sub>15</sub>H<sub>12</sub>N<sub>3</sub>O [M+H]<sup>+</sup> *Calc.* 250.0980, Found *m/z* 250.0979.

Anal. *Calc.* (%) for C<sub>15</sub>H<sub>12</sub>N<sub>3</sub>O *Calc.* % C: 72.28 H: 4.45 N: 16.86, Found % C: 72.06 H: 4.46 N: 16.77

### **1-Phenyl-3-(pyridine-4-yl)-1H-pyrazole-4-carbaldehyde 8**

Yield 13.8 (92%), mp 147 – 149 °C [1]. IR (FTIR/FTNIR-ATR): 1669 cm<sup>-1</sup> (C=O). <sup>1</sup>H-NMR (DMSO-d<sub>6</sub>) δ: 10.04 (1H, s), 9.43 (1H, s), 8.73 (2H, d, *J*=1.6 Hz), 8.02-7.97 (4H, m), 7.62-7.58 (2H, m), 7.48-7.44 (1H, m). HRMS C<sub>15</sub>H<sub>12</sub>N<sub>3</sub>O [M+H]<sup>+</sup> *Calc.* 250.0980, Found *m/z* 250.0980. Anal. *Calc.* (%) for C<sub>15</sub>H<sub>11</sub>N<sub>3</sub>O C: 72.28 H: 4.45 N: 16.86, Found C: 72.20 H: 4.42 N: 17.07

### **General procedure for the preparation of (2E)-3-[1-Substituted phenyl-3-(pyridine-3/4-yl)-1H-pyrazole-4-yl]prop-2-enoic acid derivatives (4a, 9)**

To a solution of 1-phenyl-3-(pyridin-3/4-yl)-1H-pyrazole-4-carbaldehyde (8.72 mmol) in pyridine (20 ml), malonic acid (0.035 mol), and piperidine (0.0131 mol) were added, and the reaction mixture was refluxed for 4 h. On cooling, the reaction mixture was poured onto a solution (100 ml) of crushed ice and concentrated HCl (50% by volume) mixture, then, pH was adjusted to 5. The resulting precipitated was filtered off, washed with acidified water and dried.

### **(2E)-3-[1-Phenyl-3-(pyridine-3-yl)-1H-pyrazole-4-yl]acrylic acid 4a**

Yield %91, mp 240–242 °C [1]. IR (FTIR/FTNIR-ATR): 1668 cm<sup>-1</sup> (C=O). <sup>1</sup>H-NMR (DMSO-d<sub>6</sub>) δ: 12.38 (1H, s), 9.27 (1H, s), 8.84 (1H, d, *J*=1.6 Hz), 8.69 (1H, dd, *J*=1.6 Hz, *J*=5.2 Hz), 8.05 (1H, dt, *J*=2 Hz, 7.6 Hz), 7.94 (2H, d, *J*=7.6 Hz), 7.61-7.55 (2H, m), 7.48 (1H, d, *J*=15.6 Hz), 7.41 (2H, m), 6.48-6.44 (1H, d, *J*=16 Hz). HRMS C<sub>17</sub>H<sub>14</sub>N<sub>3</sub>O<sub>2</sub> [M+H]<sup>+</sup> *Calc.* 292.1086, Found *m/z* 292.1095.

### **(2E)-3-[1-Phenyl-3-(pyridin-4-yl)-1H-pyrazol-4-yl]acrylic acid 9**

Yield 78%, mp 287 – 288 °C [1]. IR (FTIR/FTNIR-ATR): 1681cm<sup>-1</sup> (C=O), 2440 cm<sup>-1</sup> (C=C). <sup>1</sup>H-NMR (DMSO-d<sub>6</sub>) δ: 9.27 (1H, s), 8.75-8.73 (2H, d, *J*=6 Hz), 7.96-7.93 (2H, d, *J*=8.4 Hz), 7.67-7.65 (2H, d, *J*=6.4 Hz), 7.60-7.53 (3H, m), 7.43-7.40 (1H, t, *J*=7.6 Hz), 6.51-6.47 (1H, d, *J*=16 Hz). HRMS C<sub>17</sub>H<sub>14</sub>N<sub>3</sub>O [M+H]<sup>+</sup> *Calc.* 292.1086, Found *m/z* 292.1089. Anal. *Calc.* (%) for C<sub>17</sub>H<sub>13</sub>N<sub>3</sub>O C: 70.09 H: 4.50 N: 14.42, Found C: 69.92 H: 4.65 N: 14.34

**Figure S1.** Spectral data of Compound 2a

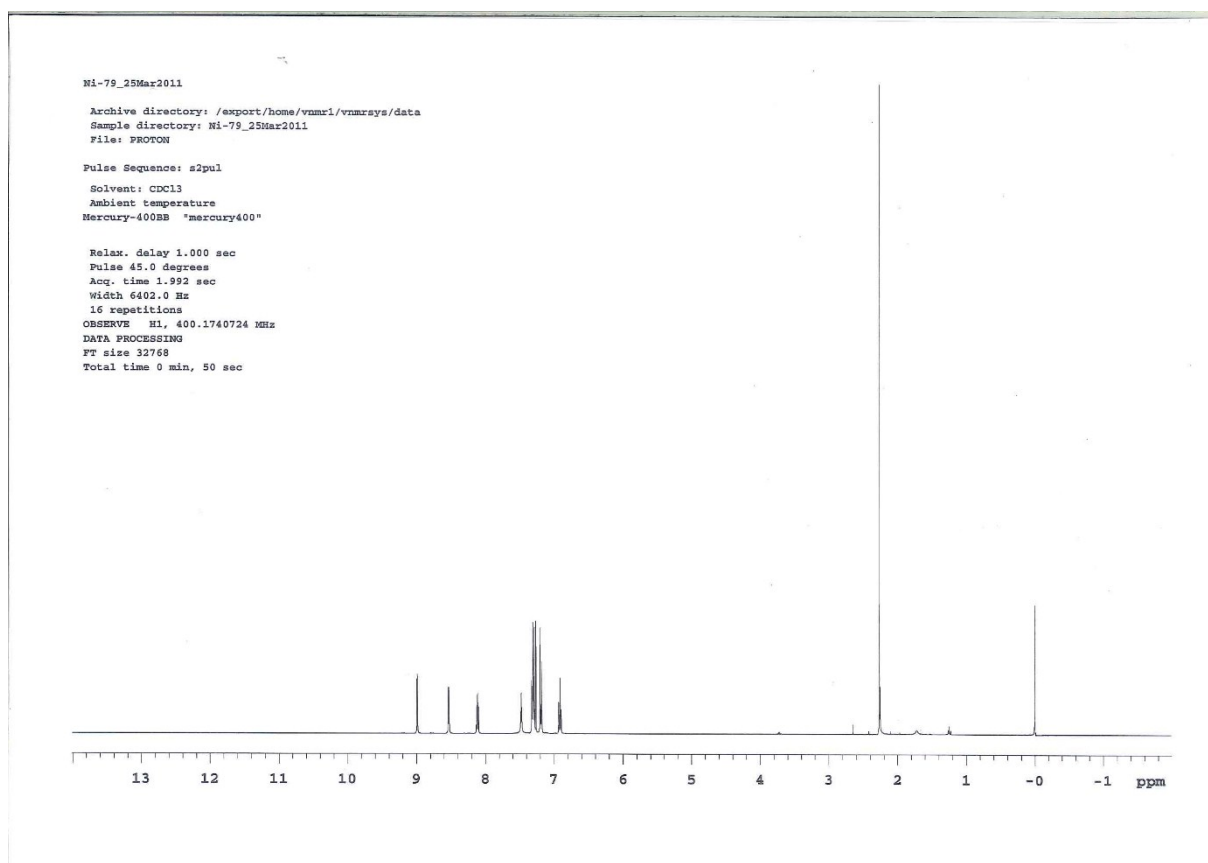

**Figure S2.** Spectral data of Compound 2b

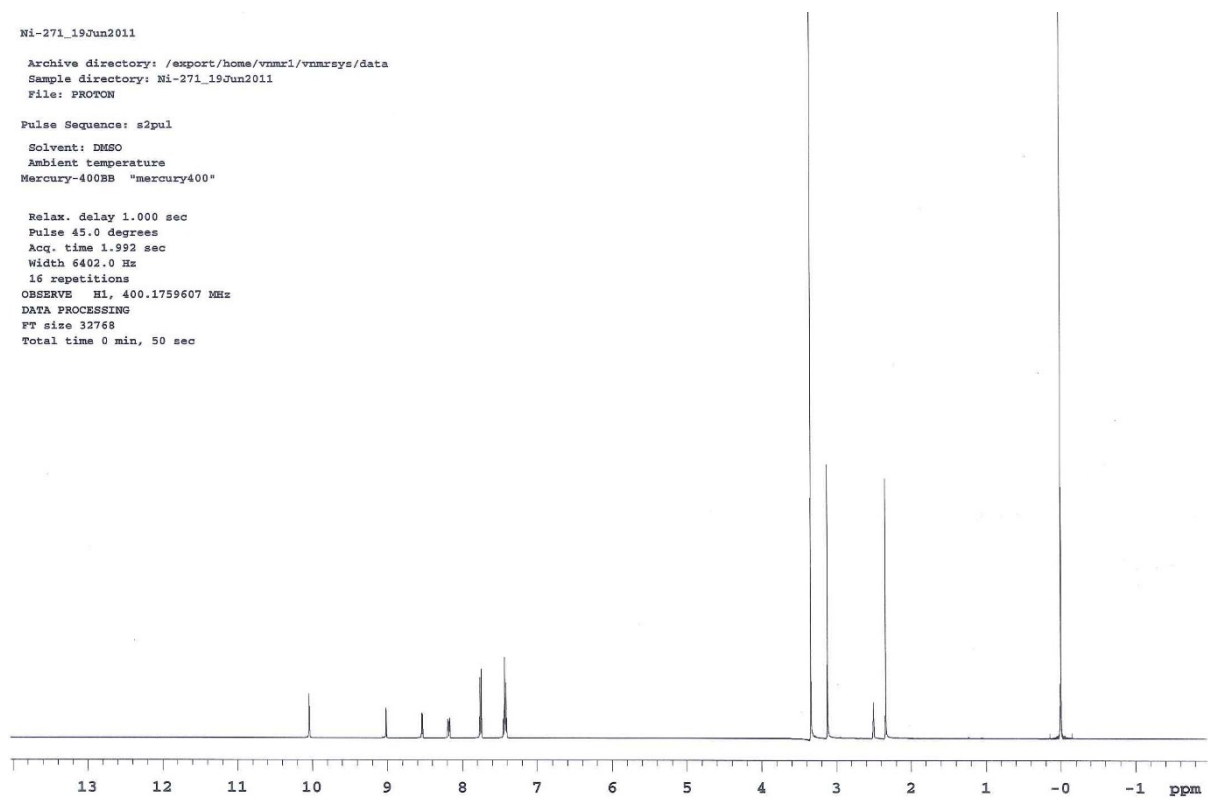

**Figure S3.** Spectral data of Compound 7

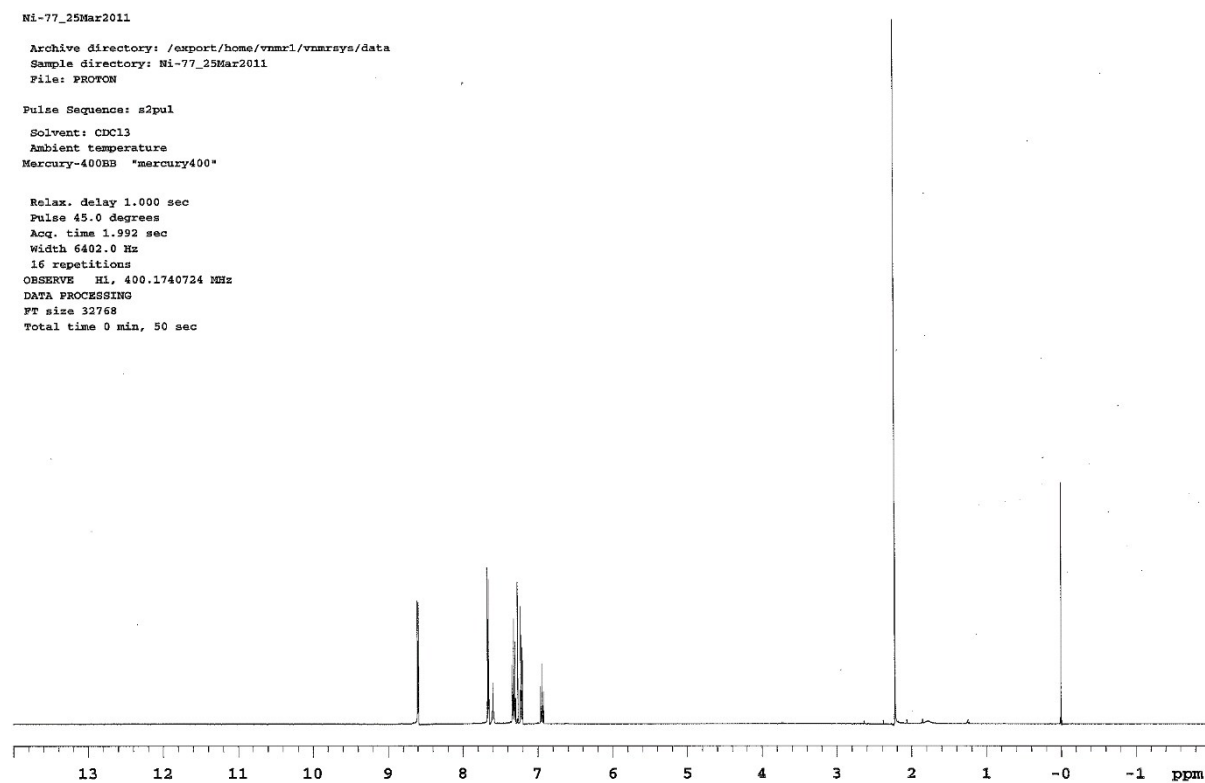

**Figure S4.** Spectral data of Compound 3a

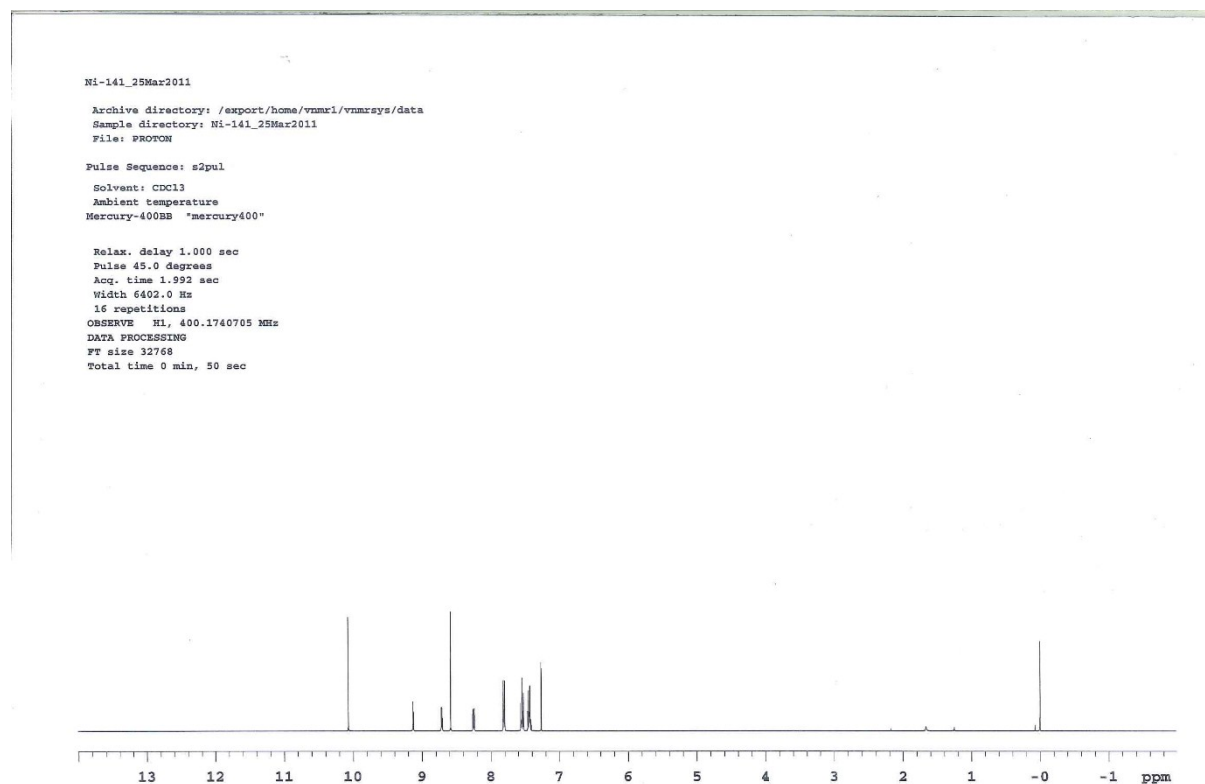

**Figure S5.** Spectral data of Compound **3b**

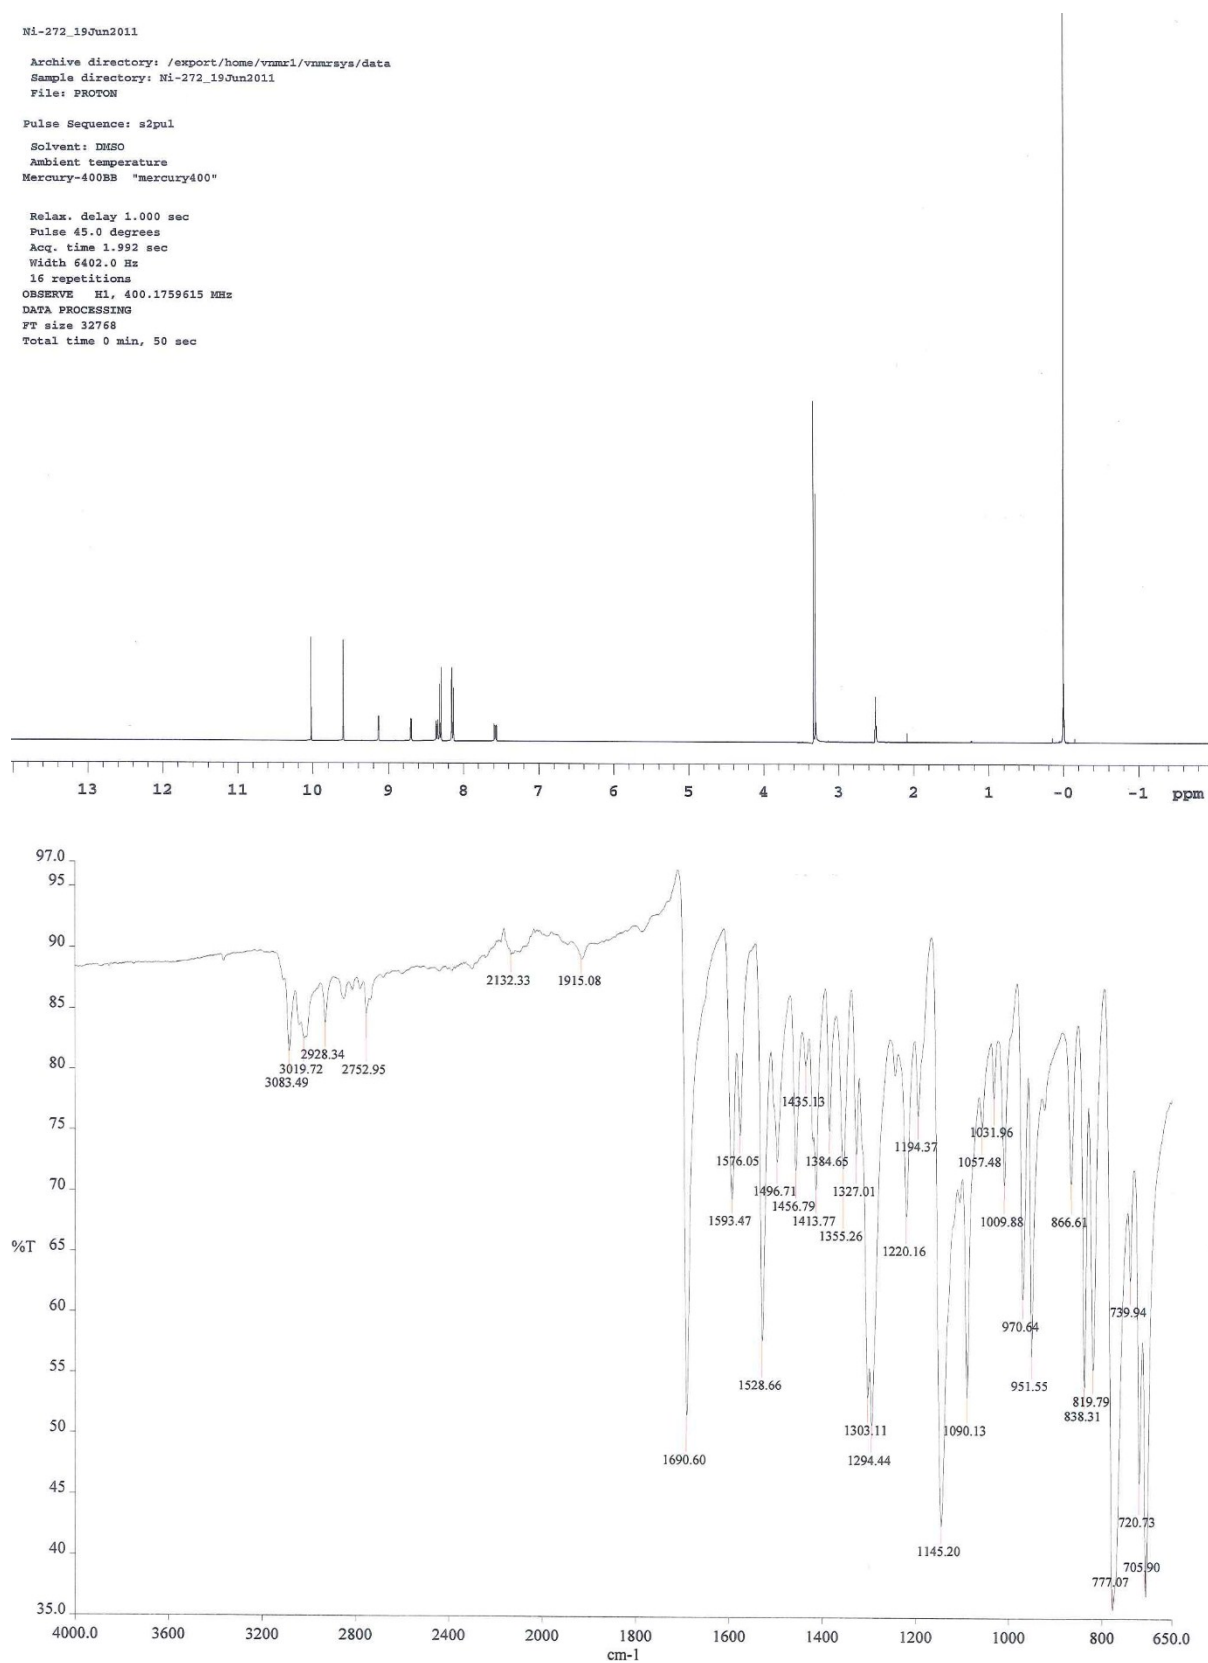

Single Mass Analysis

Tolerance = 5.0 PPM / DBE: min = -1.5, max = 50.0

Element prediction: Off

Number of isotope peaks used for i-FIT = 3

Monoisotopic Mass, Even Electron Ions

125 formula(e) evaluated with 1 results within limits (up to 50 closest results for each mass)

Elements Used:

C: 1-40 H: 1-40 N: 1-8 O: 1-5 S: 1-1

NI-272-2 71 (2.763) Cm (69:71)

1: TOF MS ES+

1.05e+004

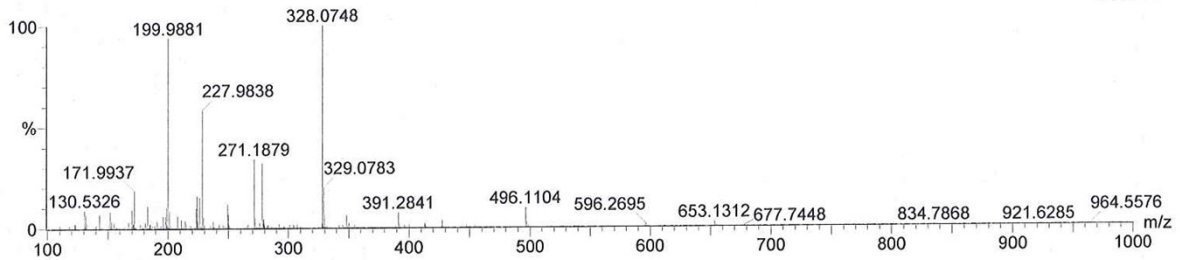

Minimum: -1.5  
Maximum: 5.0 5.0 50.0

| Mass     | Calc. Mass | mDa  | PPM  | DBE  | i-FIT | i-FIT (Norm) | Formula         |
|----------|------------|------|------|------|-------|--------------|-----------------|
| 328.0748 | 328.0756   | -0.8 | -2.4 | 11.5 | 238.7 | 0.0          | C16 H14 N3 O3 S |

Figure S6. Spectral data of Compound 8

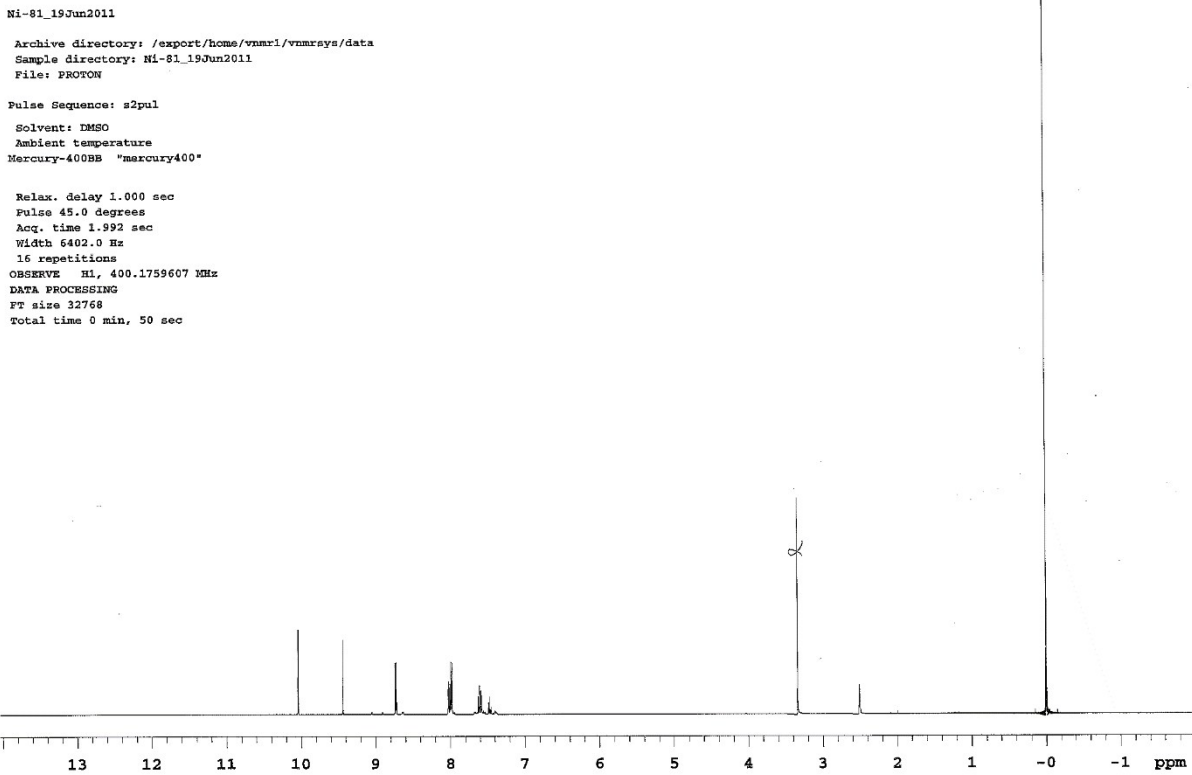



**Figure S7.** Spectral data of Compound 4a

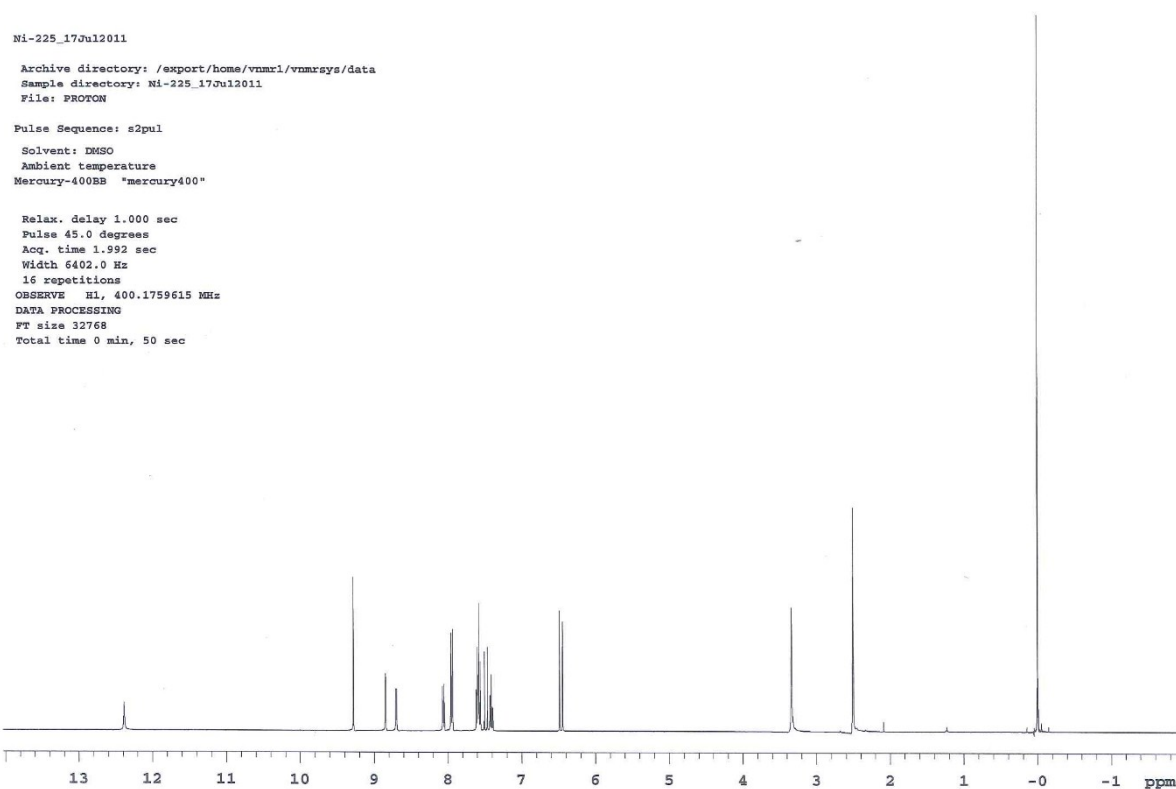

**Figure S8.** Spectral data of Compound 4b

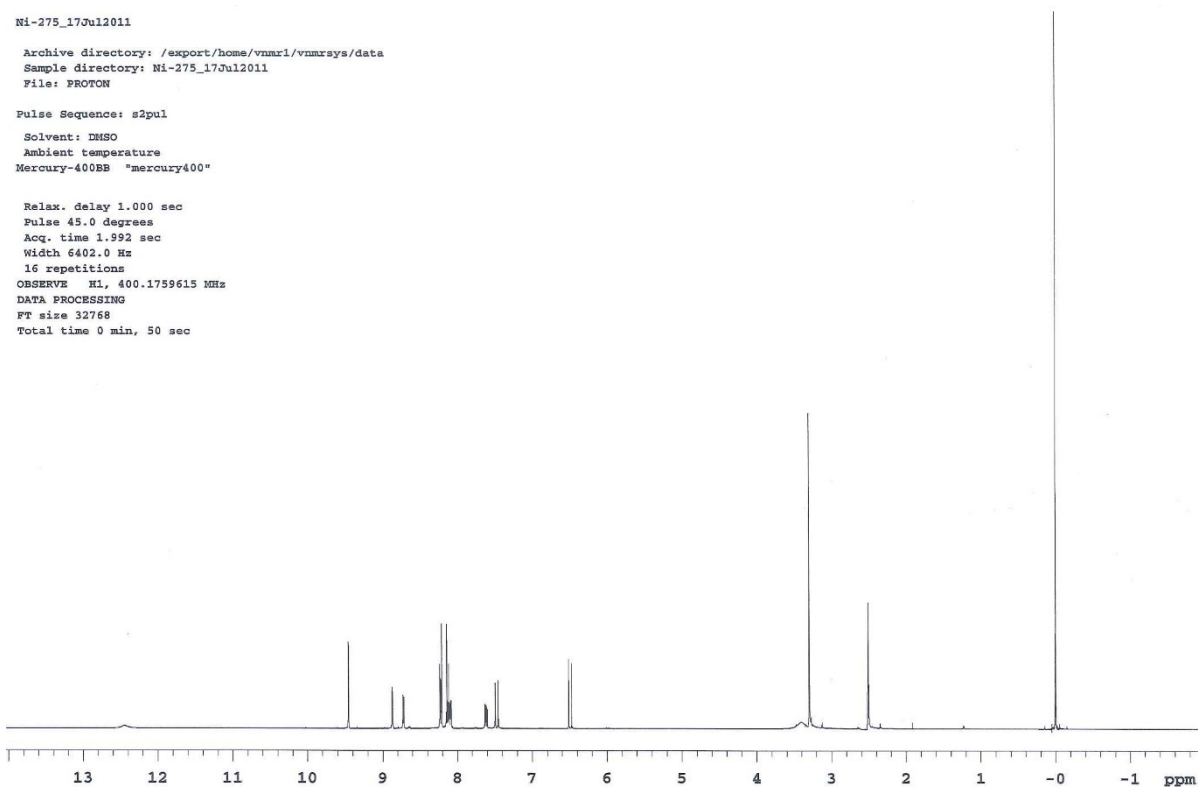

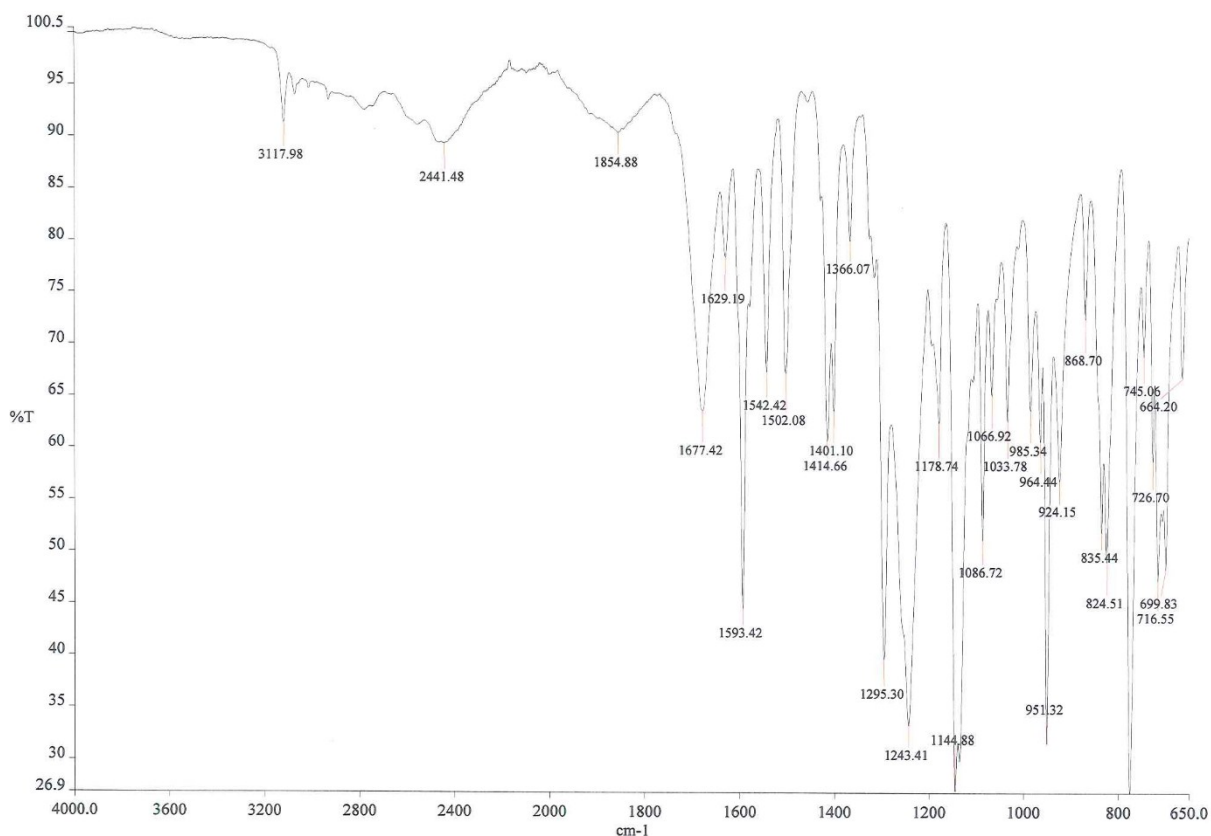

### Elemental Composition Report

#### Single Mass Analysis

Tolerance = 5.0 PPM / DBE: min = -1.5, max = 50.0

Element prediction: Off

Number of isotope peaks used for i-FIT = 3

Monoisotopic Mass, Even Electron Ions

158 formula(e) evaluated with 1 results within limits (up to 50 closest results for each mass)

Elements Used:

C: 1-40 H: 1-40 N: 1-8 O: 1-6 S: 1-1

NI-275 57 (2.233) Cm (57:60)

1: TOF MS ES+

9.33e+004

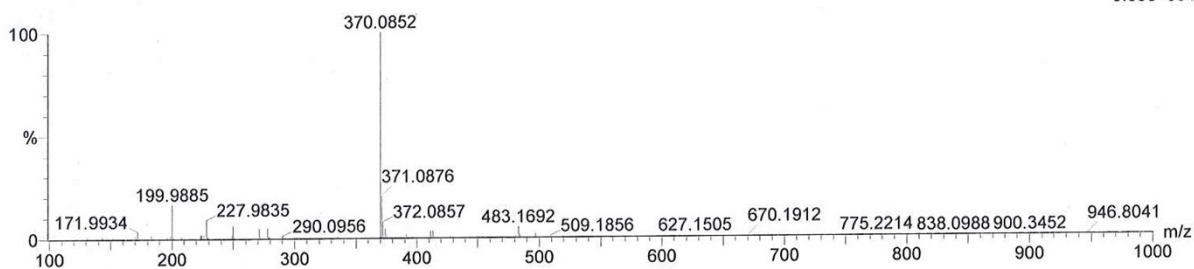

Minimum: -1.5  
Maximum: 5.0 5.0 50.0

| Mass     | Calc. Mass | mDa  | PPM  | DBE  | i-FIT | i-FIT (Norm) | Formula         |
|----------|------------|------|------|------|-------|--------------|-----------------|
| 370.0852 | 370.0862   | -1.0 | -2.7 | 12.5 | 257.3 | 0.0          | C18 H16 N3 O4 S |

**Figure S9.** Spectral data of Compound 9

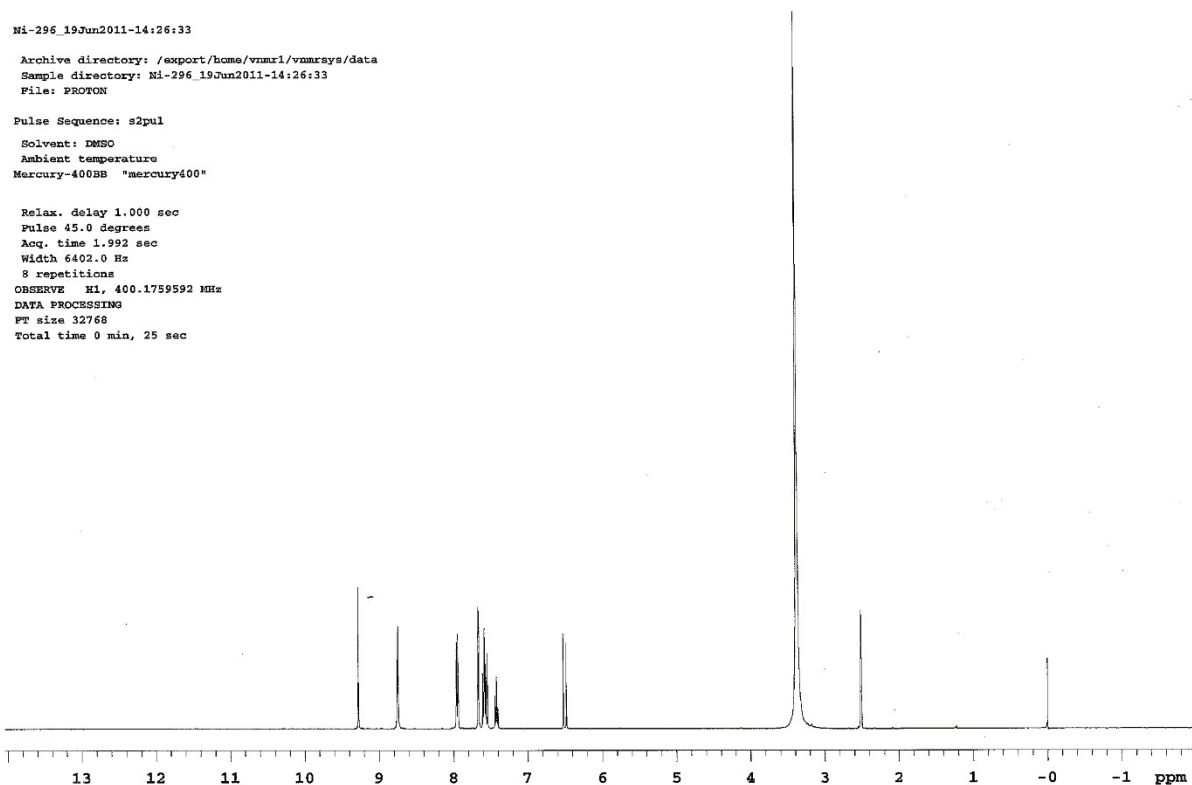

**Figure S10.** Spectral data of Compound 5a

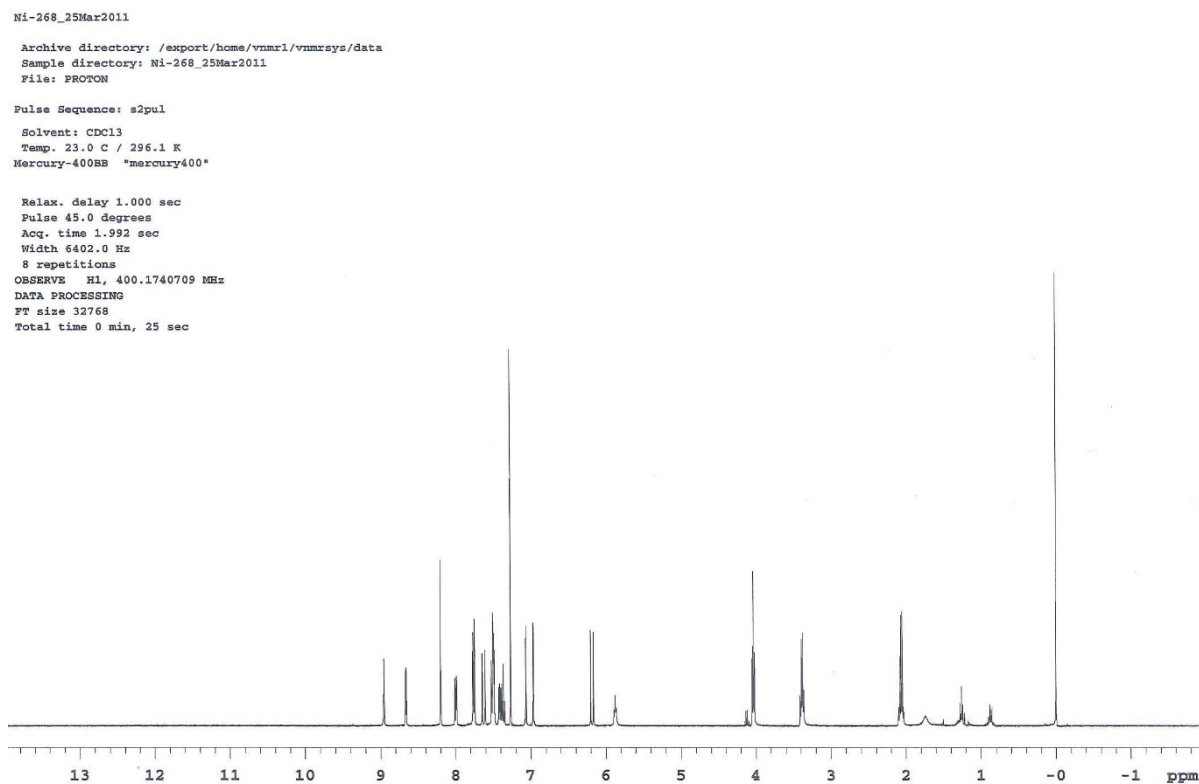

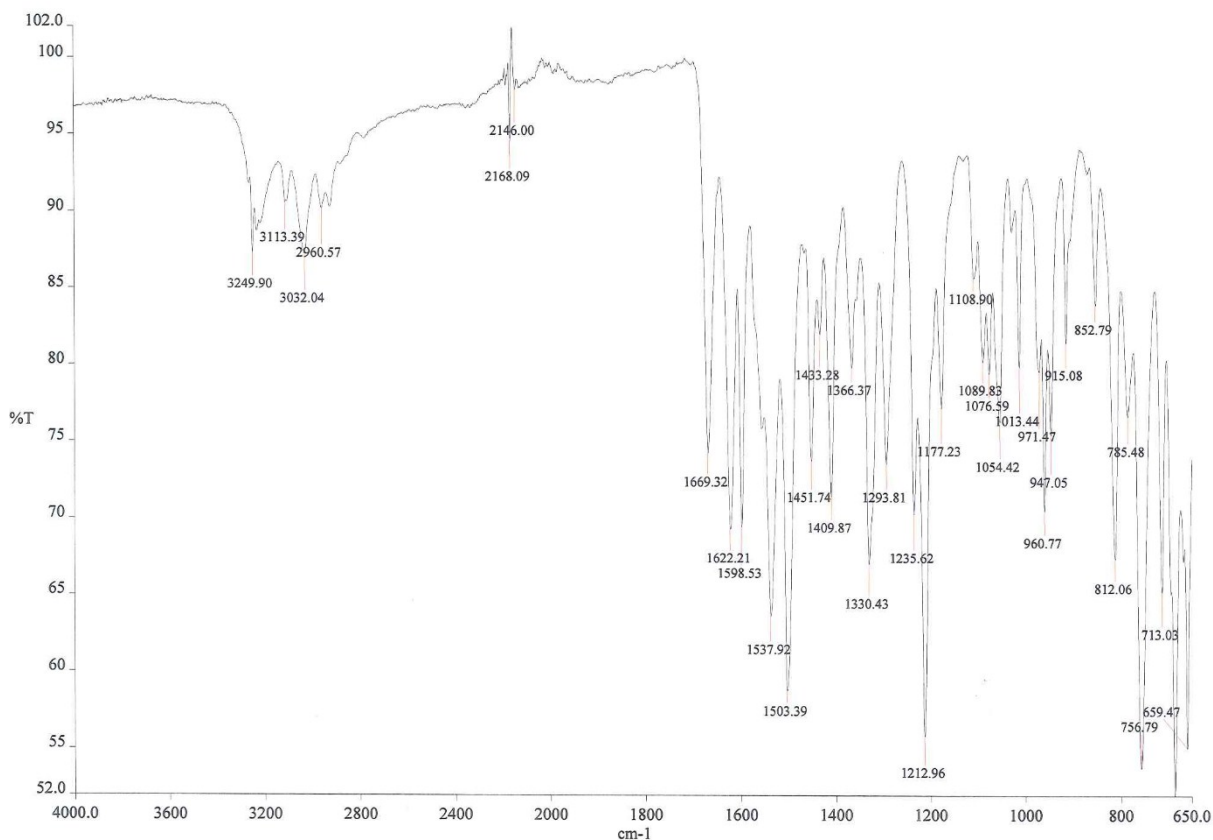

**Elemental Composition Report**

**Single Mass Analysis**

Tolerance = 5.0 PPM / DBE: min = -1.5, max = 50.0

Element prediction: Off

Number of isotope peaks used for i-FIT = 3

Monoisotopic Mass, Even Electron Ions

100 formula(e) evaluated with 2 results within limits (up to 50 closest results for each mass)

Elements Used:

C: 1-30 H: 1-30 N: 1-8 O: 1-5

NI\_268 52 (2.012) Cm (52:55)

1: TOF MS ES+

2.94e+004

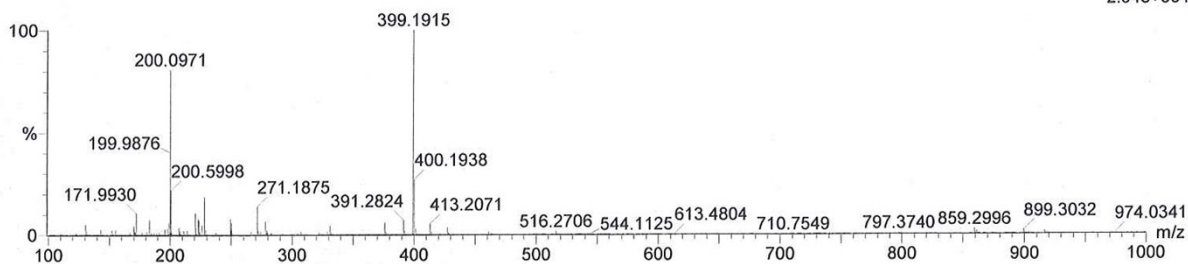

Minimum: -1.5  
Maximum: 5.0 5.0 50.0

| Mass     | Calc. Mass | mDa  | PPM  | DBE  | i-FIT | i-FIT (Norm) | Formula       |
|----------|------------|------|------|------|-------|--------------|---------------|
| 399.1915 | 399.1920   | -0.5 | -1.3 | 10.5 | 141.2 | 0.8          | C22 H27 N2 O5 |
|          | 399.1933   | -1.8 | -4.5 | 15.5 | 141.0 | 0.6          | C23 H23 N6 O  |

**Figure S11.** Spectral data of Compound **5b**

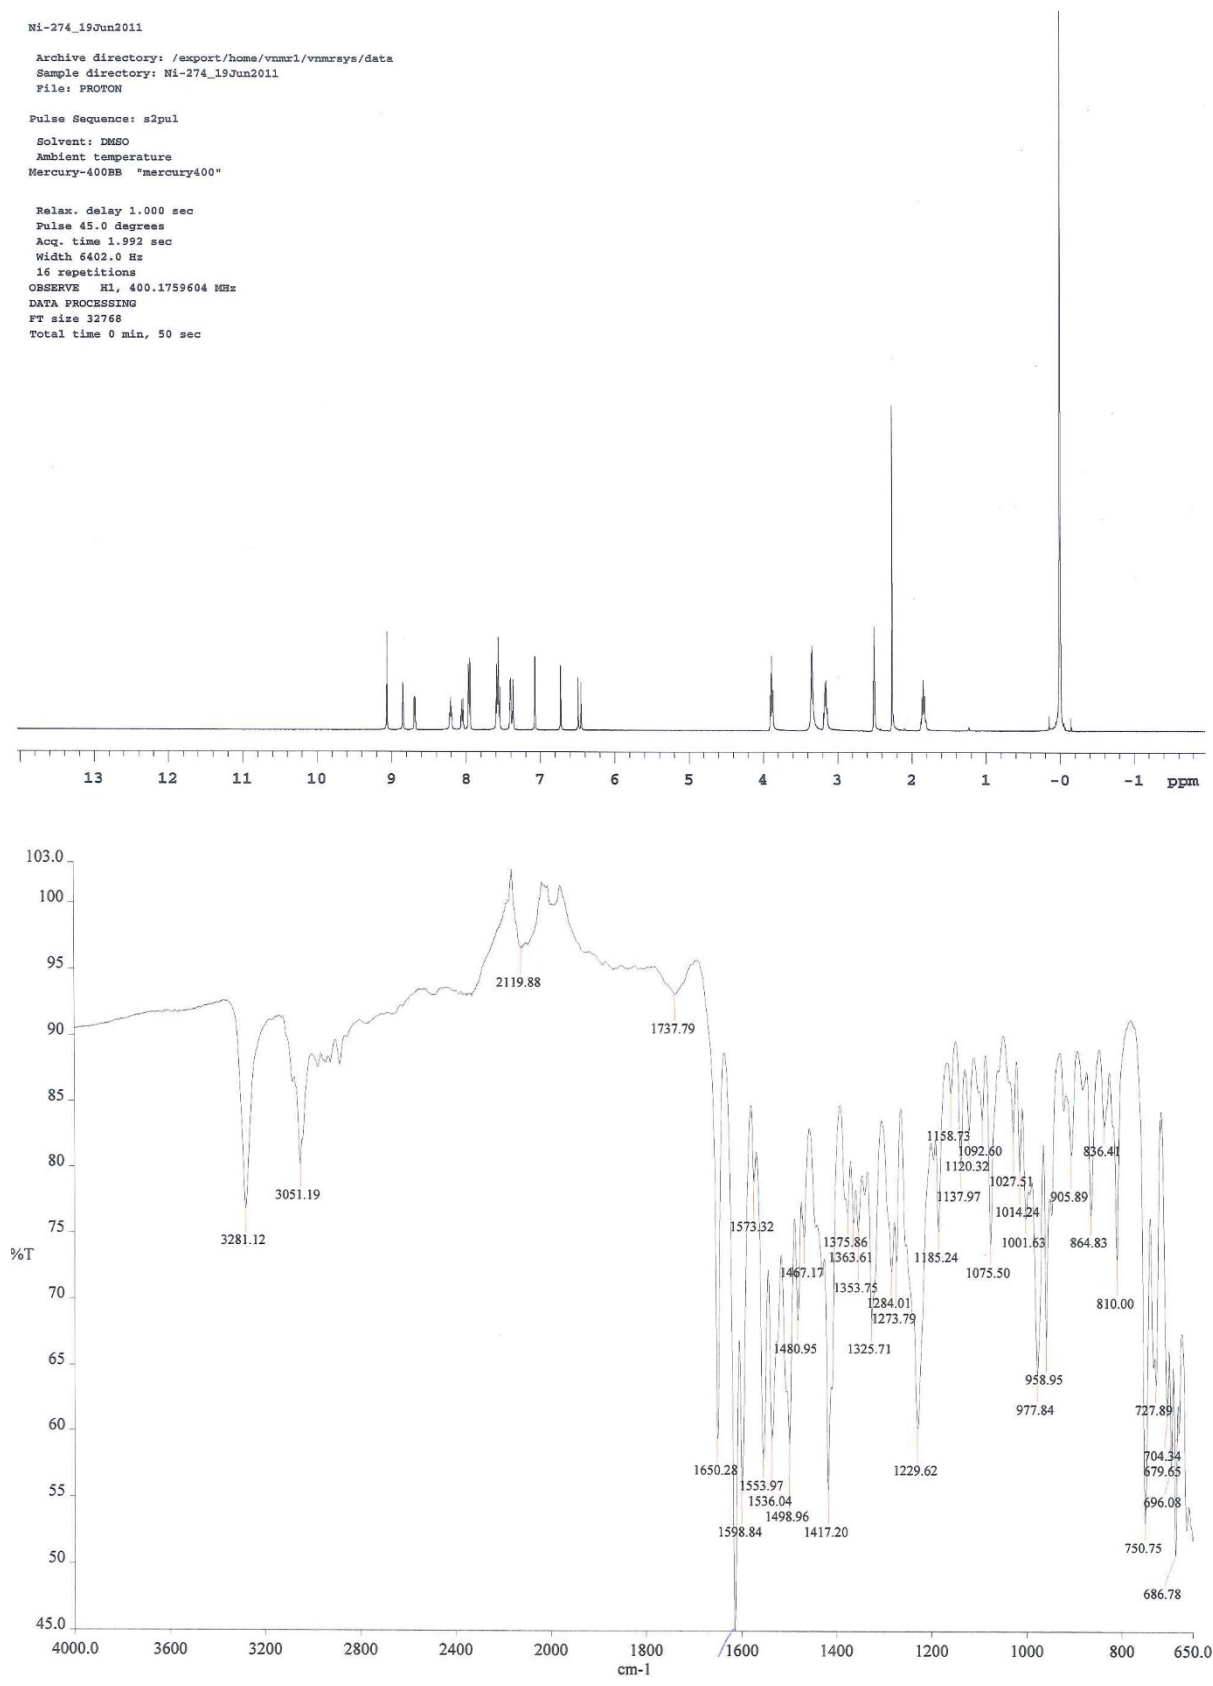

Single Mass Analysis

Tolerance = 5.0 PPM / DBE: min = -1.5, max = 50.0

Element prediction: Off

Number of isotope peaks used for i-FIT = 3

Monoisotopic Mass, Even Electron Ions

26 formula(e) evaluated with 1 results within limits (up to 50 closest results for each mass)

Elements Used:

C: 1-40 H: 1-40 N: 1-8 O: 1-1

NI-274 50 (1.949) Cm (49:52)

1: TOF MS ES+

5.75e+005

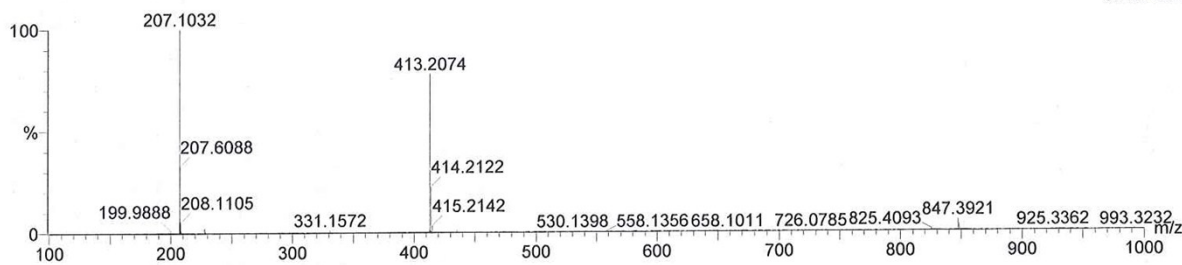

Minimum: -1.5  
Maximum: 5.0 5.0 50.0

| Mass     | Calc. Mass | mDa  | PPM  | DBE  | i-FIT | i-FIT (Norm) | Formula      |
|----------|------------|------|------|------|-------|--------------|--------------|
| 413.2074 | 413.2090   | -1.6 | -3.9 | 15.5 | 492.5 | 0.0          | C24 H25 N6 O |

Figure S12. Spectral data of Compound 5c

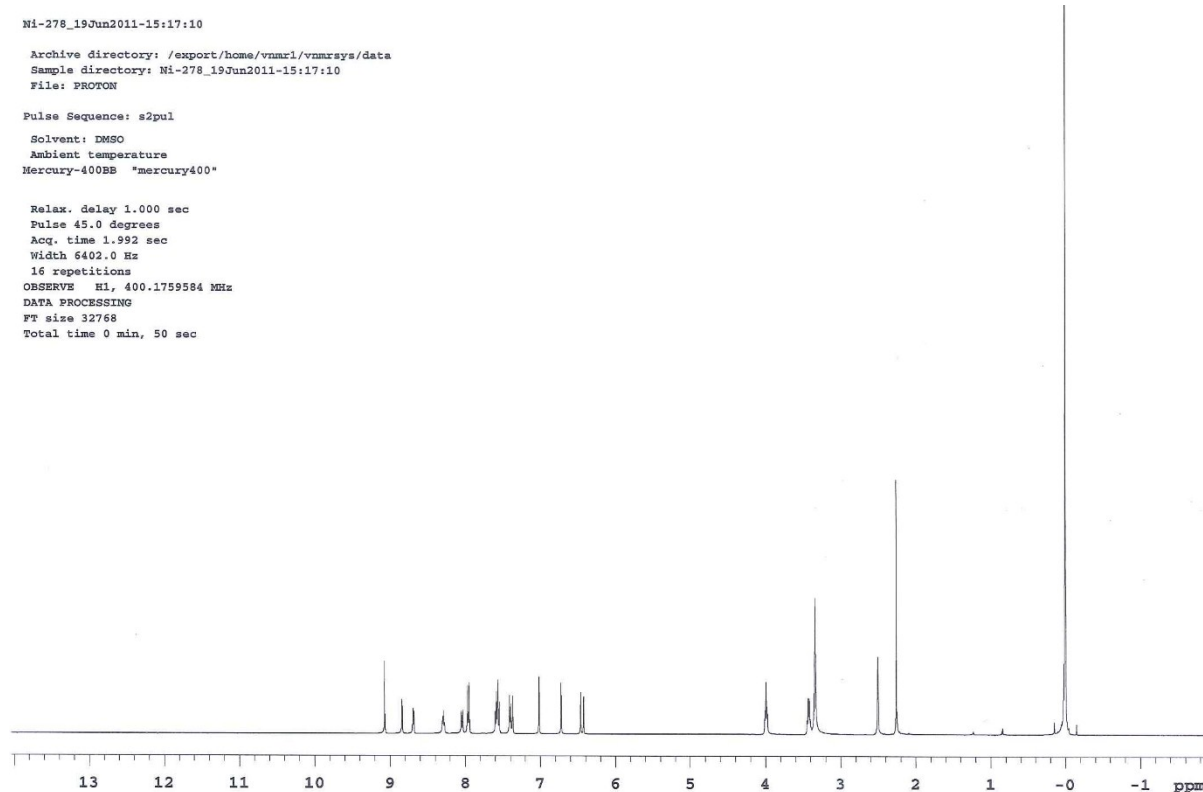

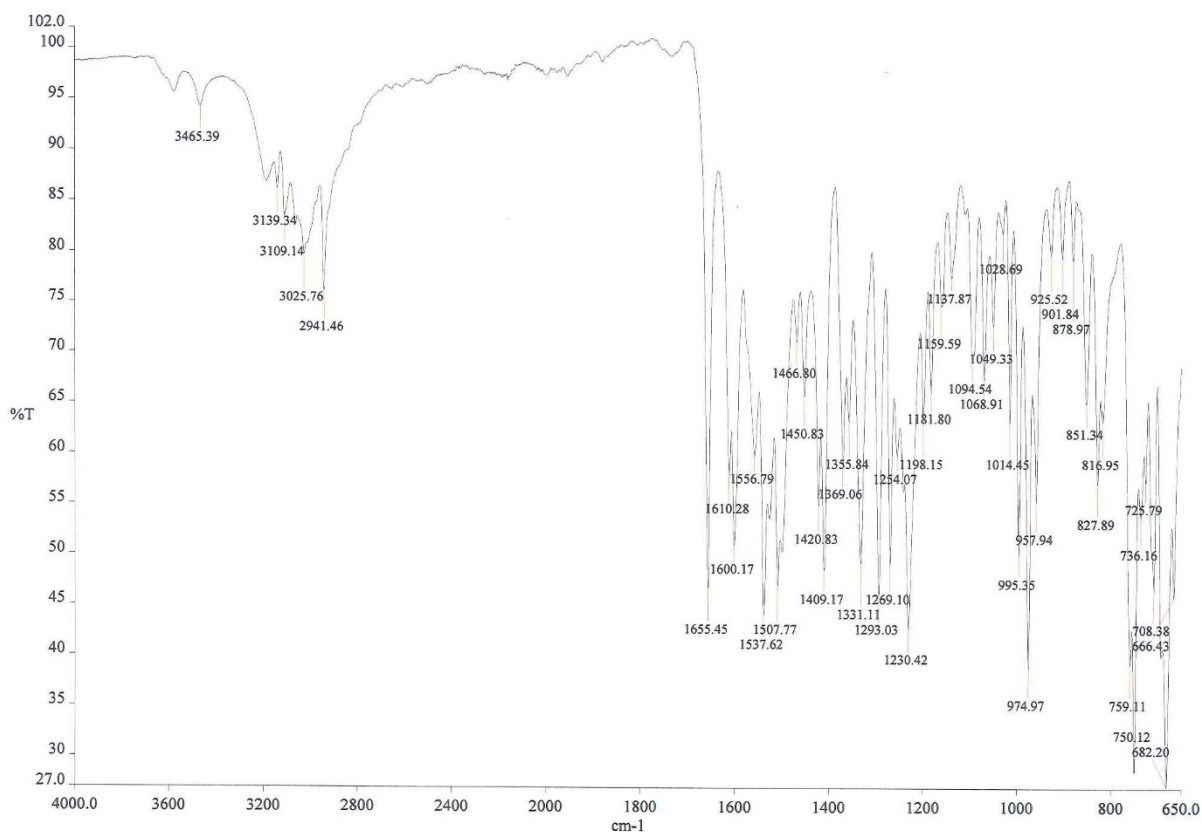

**Elemental Composition Report**

**Single Mass Analysis**

Tolerance = 5.0 PPM / DBE: min = -1.5, max = 50.0

Element prediction: Off

Number of isotope peaks used for i-FIT = 3

Monoisotopic Mass, Even Electron Ions

75 formula(e) evaluated with 2 results within limits (up to 50 closest results for each mass)

Elements Used:

C: 1-27 H: 1-33 N: 1-6 O: 1-5

NI-278X 52 (2.012) Cm (52:55)

1: TOF MS ES+

2.64e+004

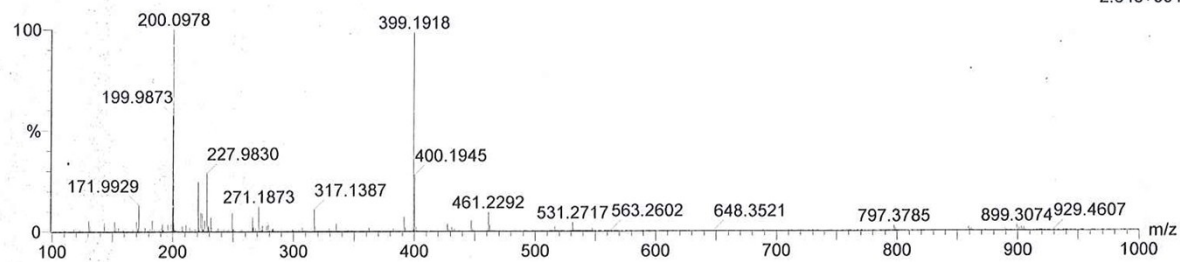

Minimum: -1.5  
Maximum: 5.0 5.0 50.0

| Mass     | Calc. Mass | mDa  | PPM  | DBE  | i-FIT | i-FIT (Norm) | Formula       |
|----------|------------|------|------|------|-------|--------------|---------------|
| 399.1918 | 399.1920   | -0.2 | -0.5 | 10.5 | 180.2 | 1.0          | C22 H27 N2 O5 |
|          | 399.1933   | -1.5 | -3.8 | 15.5 | 179.6 | 0.4          | C23 H23 N6 O  |

# Figure S13. Spectral data of Compound 5d

Ni-266\_25Mar2011

Archive directory: /export/home/vnmr1/vnmrsys/data  
Sample directory: Ni-266\_25Mar2011  
File: PROTON

Pulse Sequence: s2pul  
Solvent: CDCl3  
Temp. 23.0 C / 296.1 K  
Mercury-400BB "mercury400"

Relax. delay 1.000 sec  
Pulse 45.0 degrees  
Acq. time 1.992 sec  
Width 6402.0 Hz  
16 repetitions  
OBSERVE H1, 400.1740709 MHz  
DATA PROCESSING  
FT size 32768  
Total time 0 min, 50 sec

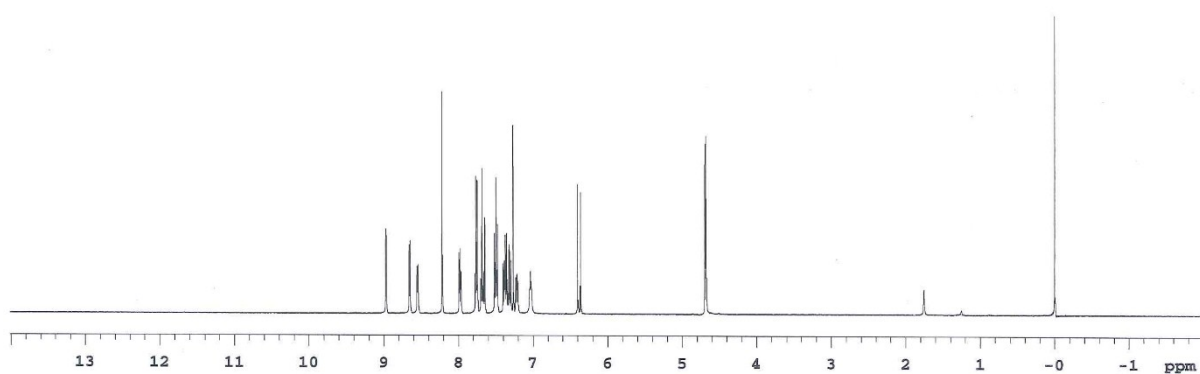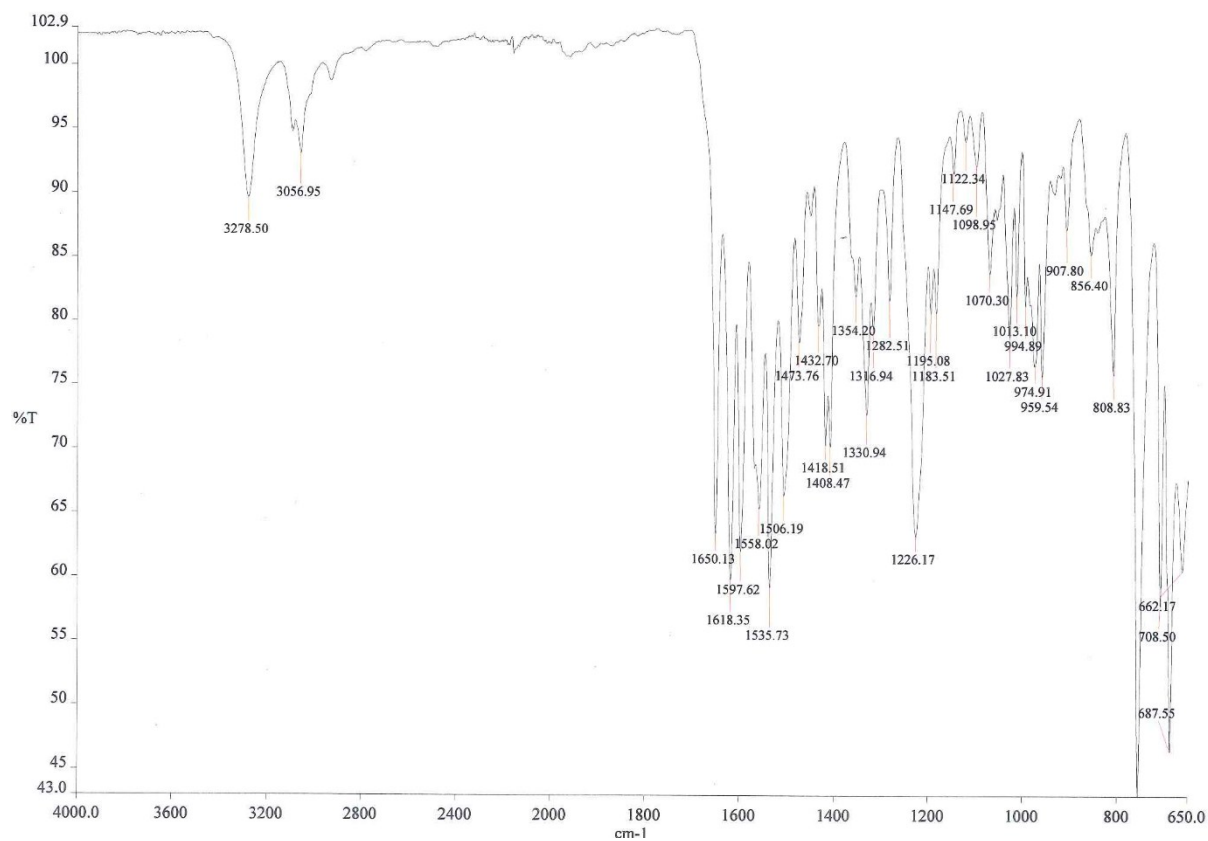



## Single Mass Analysis

Tolerance = 5.0 PPM / DBE: min = -1.5, max = 50.0

Element prediction: Off

Number of isotope peaks used for i-FIT = 3

Monoisotopic Mass, Even Electron Ions

21 formula(e) evaluated with 1 results within limits (up to 50 closest results for each mass)

Elements Used:

C: 1-30 H: 1-30 N: 1-8 O: 1-1

NI266 53 (2.078) Cm (51:60)

1: TOF MS ES+

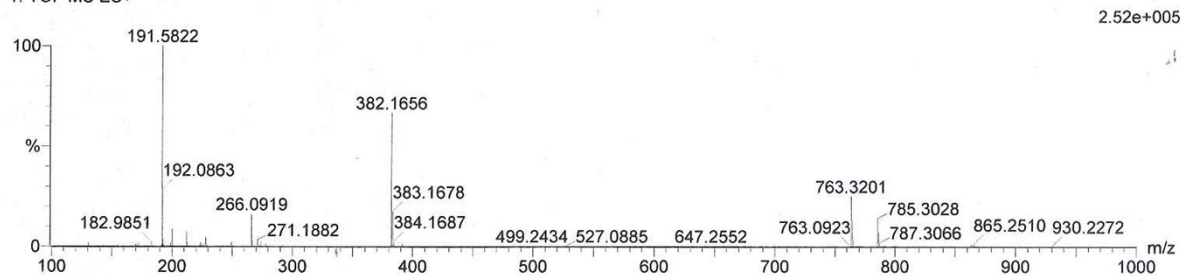

Minimum: -1.5  
 Maximum: 5.0 5.0 50.0

| Mass     | Calc. Mass | mDa  | PPM  | DBE  | i-FIT | i-FIT (Norm) | Formula      |
|----------|------------|------|------|------|-------|--------------|--------------|
| 382.1656 | 382.1668   | -1.2 | -3.1 | 16.5 | 449.7 | 0.0          | C23 H20 N5 O |

Figure S14. Spectral data of Compound 5e

Ni-263\_25Mar2011

Archive directory: /export/home/vnmr1/vnmrsys/data  
 Sample directory: Ni-263\_25Mar2011  
 File: PROTON

Pulse Sequence: s2pul  
 Solvent: CDCl3  
 Ambient temperature  
 Mercury-400BB "mercury400"

Relax. delay 1.000 sec  
 Pulse 45.0 degrees  
 Acq. time 1.992 sec  
 Width 6402.0 Hz  
 32 repetitions  
 OBSERVE H1, 400.1740701 MHz  
 DATA PROCESSING  
 FT size 32768  
 Total time 1 min, 40 sec

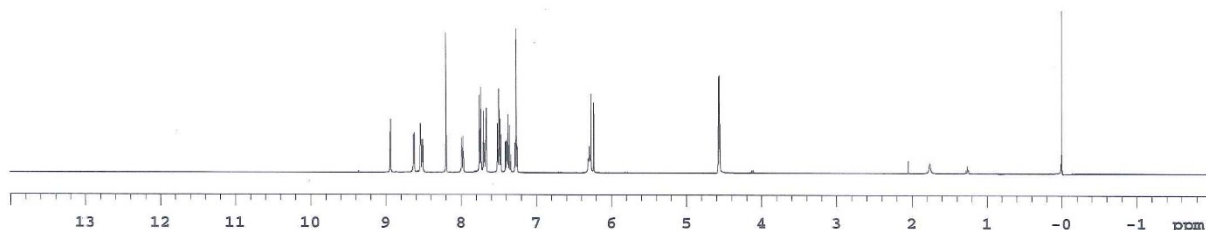

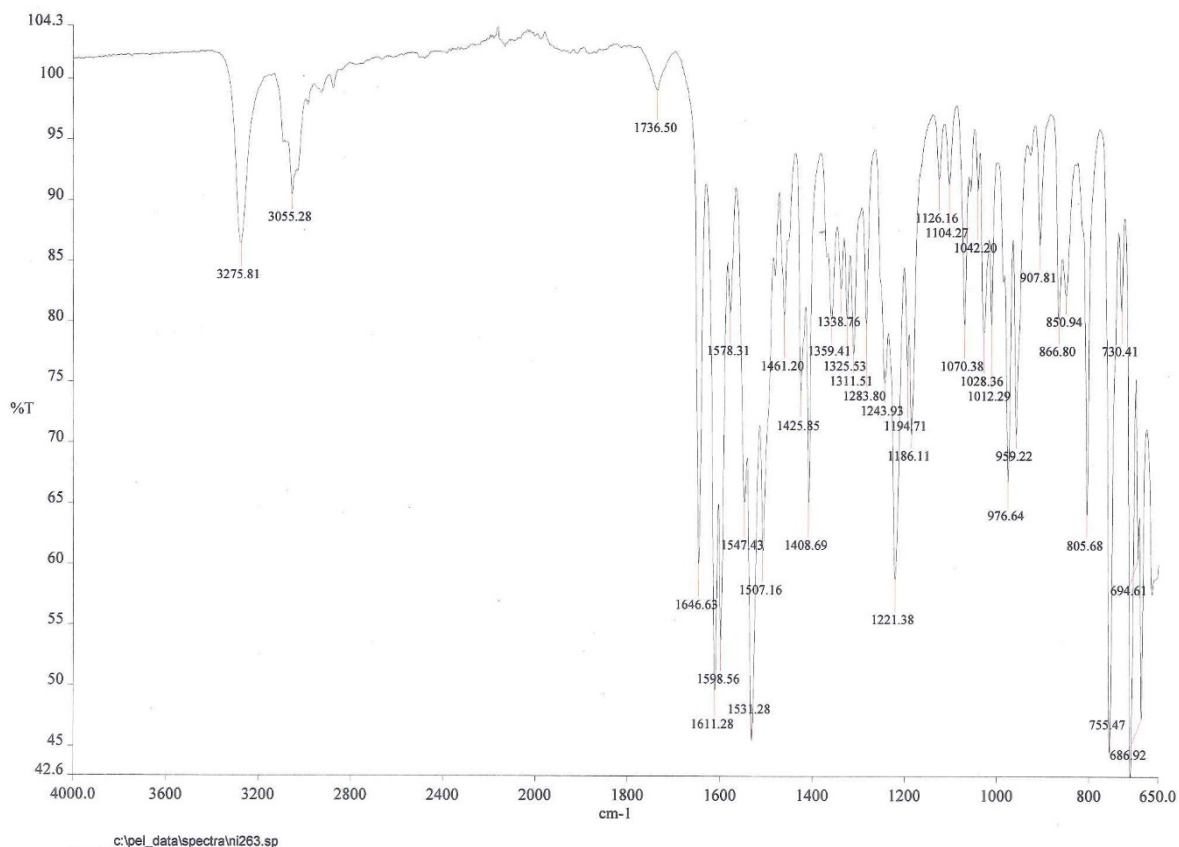

### Elemental Composition Report

#### Single Mass Analysis

Tolerance = 5.0 PPM / DBE: min = -1.5, max = 50.0

Element prediction: Off

Number of isotope peaks used for i-FIT = 3

Monoisotopic Mass, Even Electron Ions

188 formula(e) evaluated with 1 results within limits (up to 50 closest results for each mass)

Elements Used:

C: 1-40 H: 1-40 N: 1-8 O: 1-7

Ni263 49 (1.916) Cm (48:50)

1: TOF MS ES+

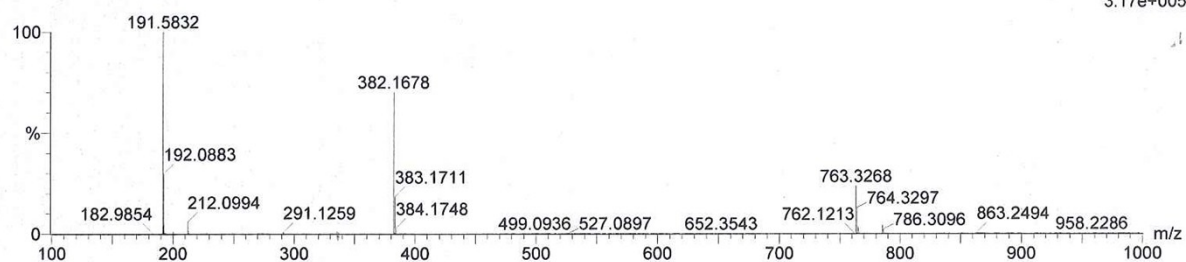

Minimum: -1.5  
Maximum: 5.0 5.0 50.0

| Mass     | Calc. Mass | mDa | PPM | DBE  | i-FIT | i-FIT (Norm) | Formula      |
|----------|------------|-----|-----|------|-------|--------------|--------------|
| 382.1678 | 382.1668   | 1.0 | 2.6 | 16.5 | 436.6 | 0.0          | C23 H20 N5 O |

**Figure S15.** Spectral data of Compound **5f**

Ni-267\_25Mar2011

Archive directory: /export/home/vnmr1/vnmrSYS/data  
Sample directory: Ni-267\_25Mar2011  
File: PROTON

Pulse Sequence: s2pul

Solvent: CDCl3  
Temp. 23.0 C / 296.1 K  
Mercury-400BB "mercury400"

Relax. delay 1.000 sec  
Pulse 45.0 degrees  
Acq. time 1.992 sec  
Width 6402.0 Hz  
8 repetitions  
OBSERVE H1, 400.1740701 MHz  
DATA PROCESSING  
F1 size 32768  
Total time 0 min, 25 sec

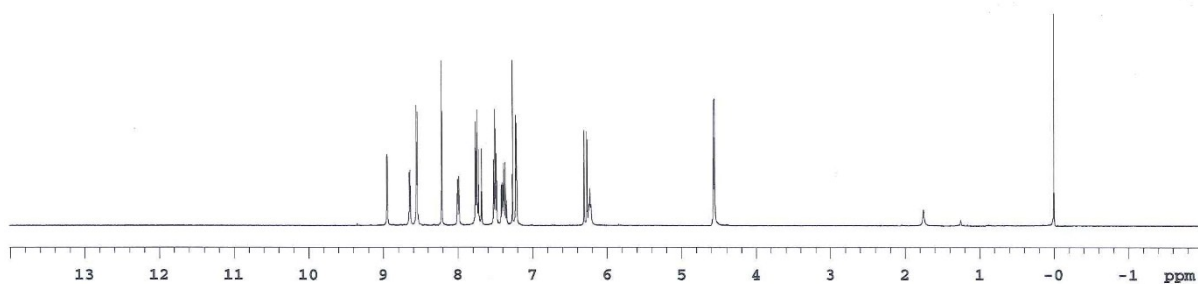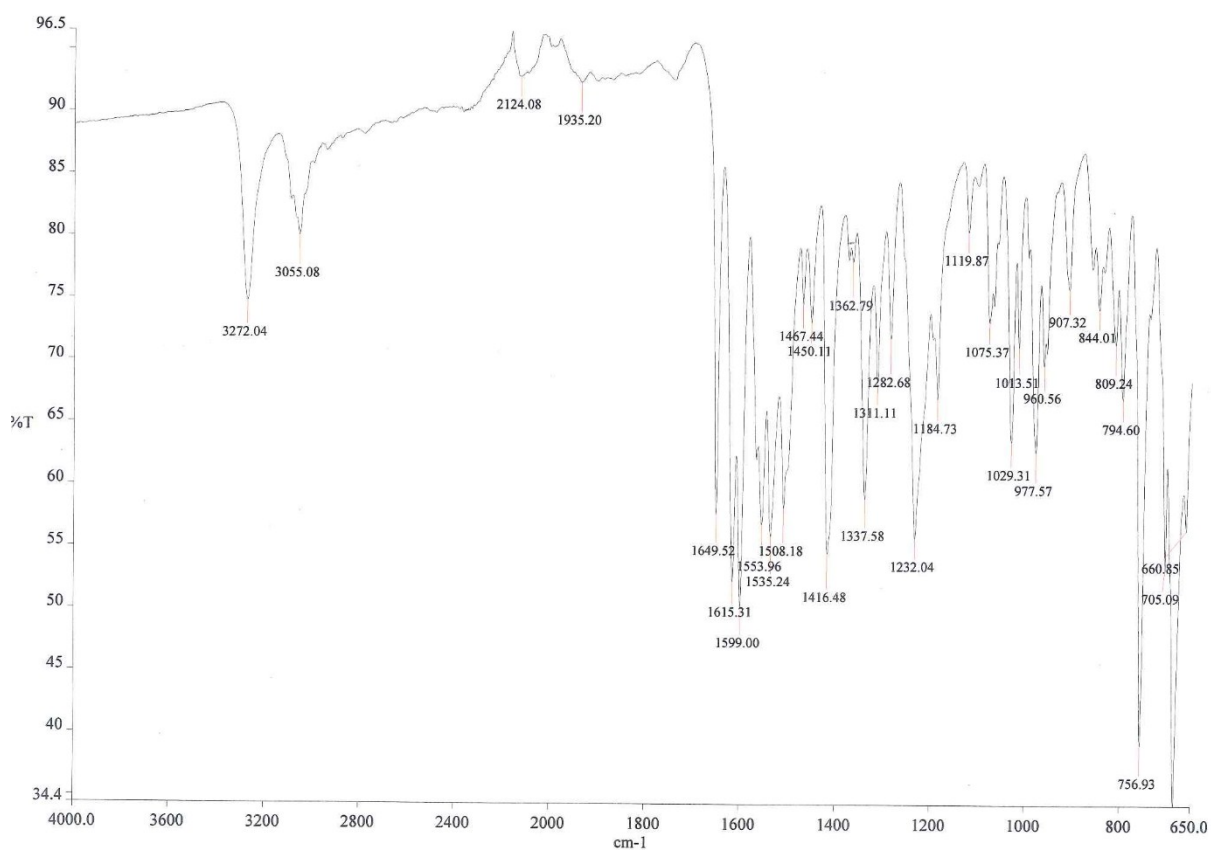

**Single Mass Analysis**

Tolerance = 5.0 PPM / DBE: min = -1.5, max = 50.0

Element prediction: Off

Number of isotope peaks used for i-FIT = 3

Monoisotopic Mass, Even Electron Ions

21 formula(e) evaluated with 1 results within limits (up to 50 closest results for each mass)

Elements Used:

C: 1-30 H: 1-30 N: 1-8 O: 1-1

NI267 51 (1.981) Cm (51:54)

1: TOF MS ES+

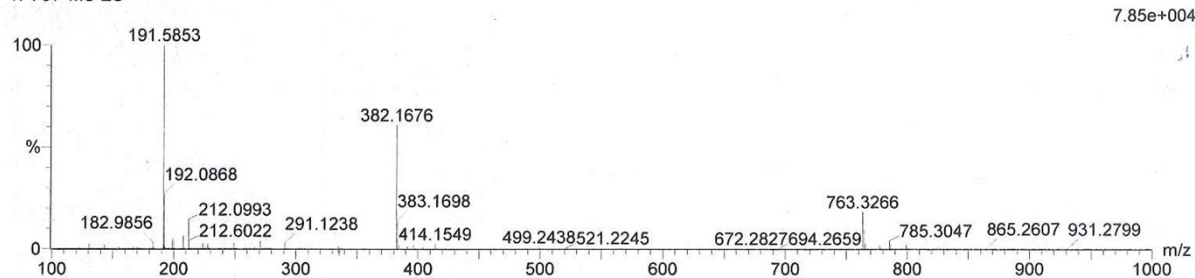

Minimum: -1.5  
Maximum: 5.0 5.0 50.0

| Mass     | Calc. Mass | mDa | PPM | DBE  | i-FIT | i-FIT (Norm) | Formula      |
|----------|------------|-----|-----|------|-------|--------------|--------------|
| 382.1676 | 382.1668   | 0.8 | 2.1 | 16.5 | 151.5 | 0.0          | C23 H20 N5 O |

**Figure S16.** Spectral data of Compound 5g

Ni-269\_25Mar2011

Archive directory: /export/home/vmmr1/vmmreys/data

Sample directory: Ni-269\_25Mar2011

File: PROTON

Pulse Sequence: s2pul

Solvent: CDCl3

Temp. 23.0 C / 296.1 K

Mercury-400BB \*mercury400\*

Relax. delay 1.000 sec

Pulse 45.0 degrees

Acq. time 1.992 sec

Width 6402.0 Hz

8 repetitions

OBSERVE H1, 400.1740709 MHz

DATA PROCESSING

FR size 32768

Total time 0 min, 25 sec

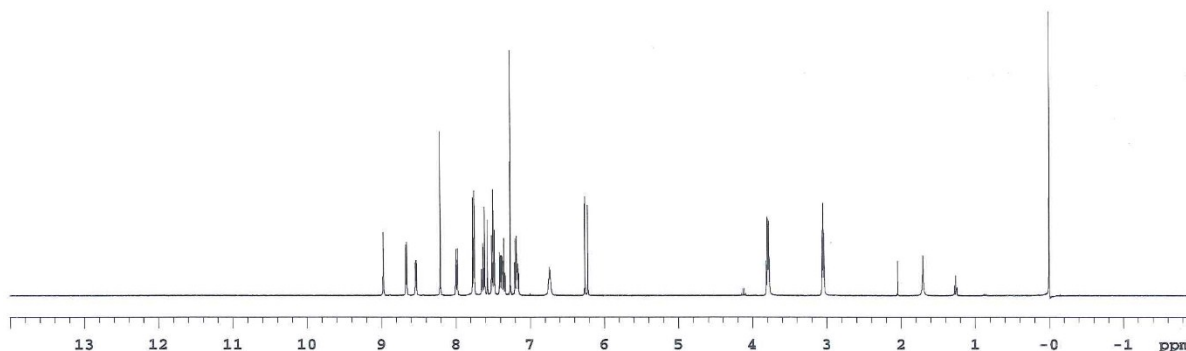

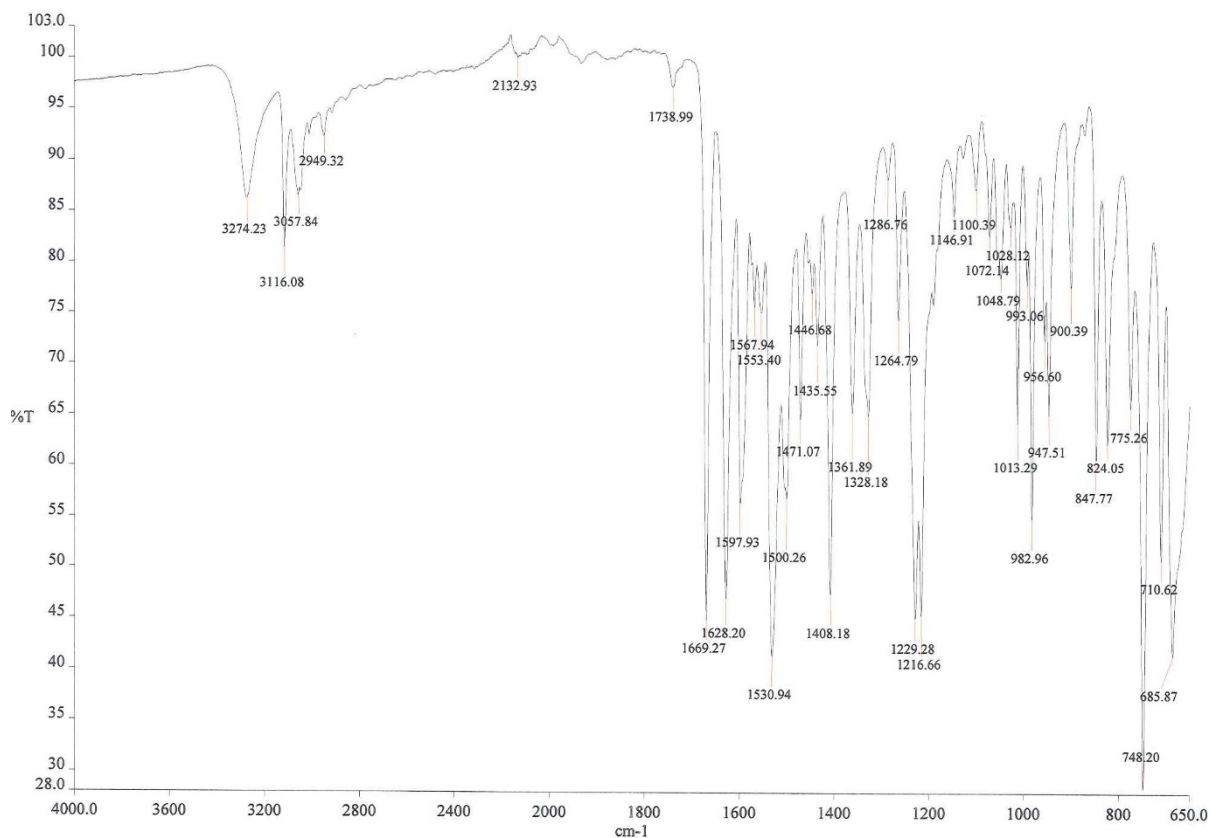

**Elemental Composition Report**

**Single Mass Analysis**

Tolerance = 5.0 PPM / DBE: min = -1.5, max = 50.0

Element prediction: Off

Number of isotope peaks used for i-FIT = 3

Monoisotopic Mass, Even Electron Ions

101 formula(e) evaluated with 2 results within limits (up to 50 closest results for each mass)

Elements Used:

C: 1-30 H: 1-30 N: 1-8 O: 1-5

NI\_269 54 (2.104) Cm (54:56)

1: TOF MS ES+

2.17e+004

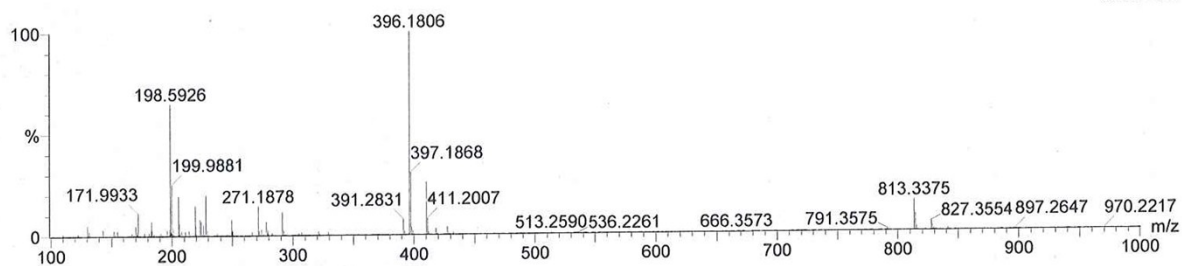

Minimum: -1.5  
Maximum: 5.0 5.0 50.0

| Mass     | Calc. Mass | mDa  | PPM  | DBE  | i-FIT | i-FIT (Norm) | Formula      |
|----------|------------|------|------|------|-------|--------------|--------------|
| 396.1806 | 396.1811   | -0.5 | -1.3 | 11.5 | 105.1 | 2.1          | C23 H26 N O5 |
|          | 396.1824   | -1.8 | -4.5 | 16.5 | 103.1 | 0.1          | C24 H22 N5 O |

**Figure S17.** Spectral data of Compound 5h

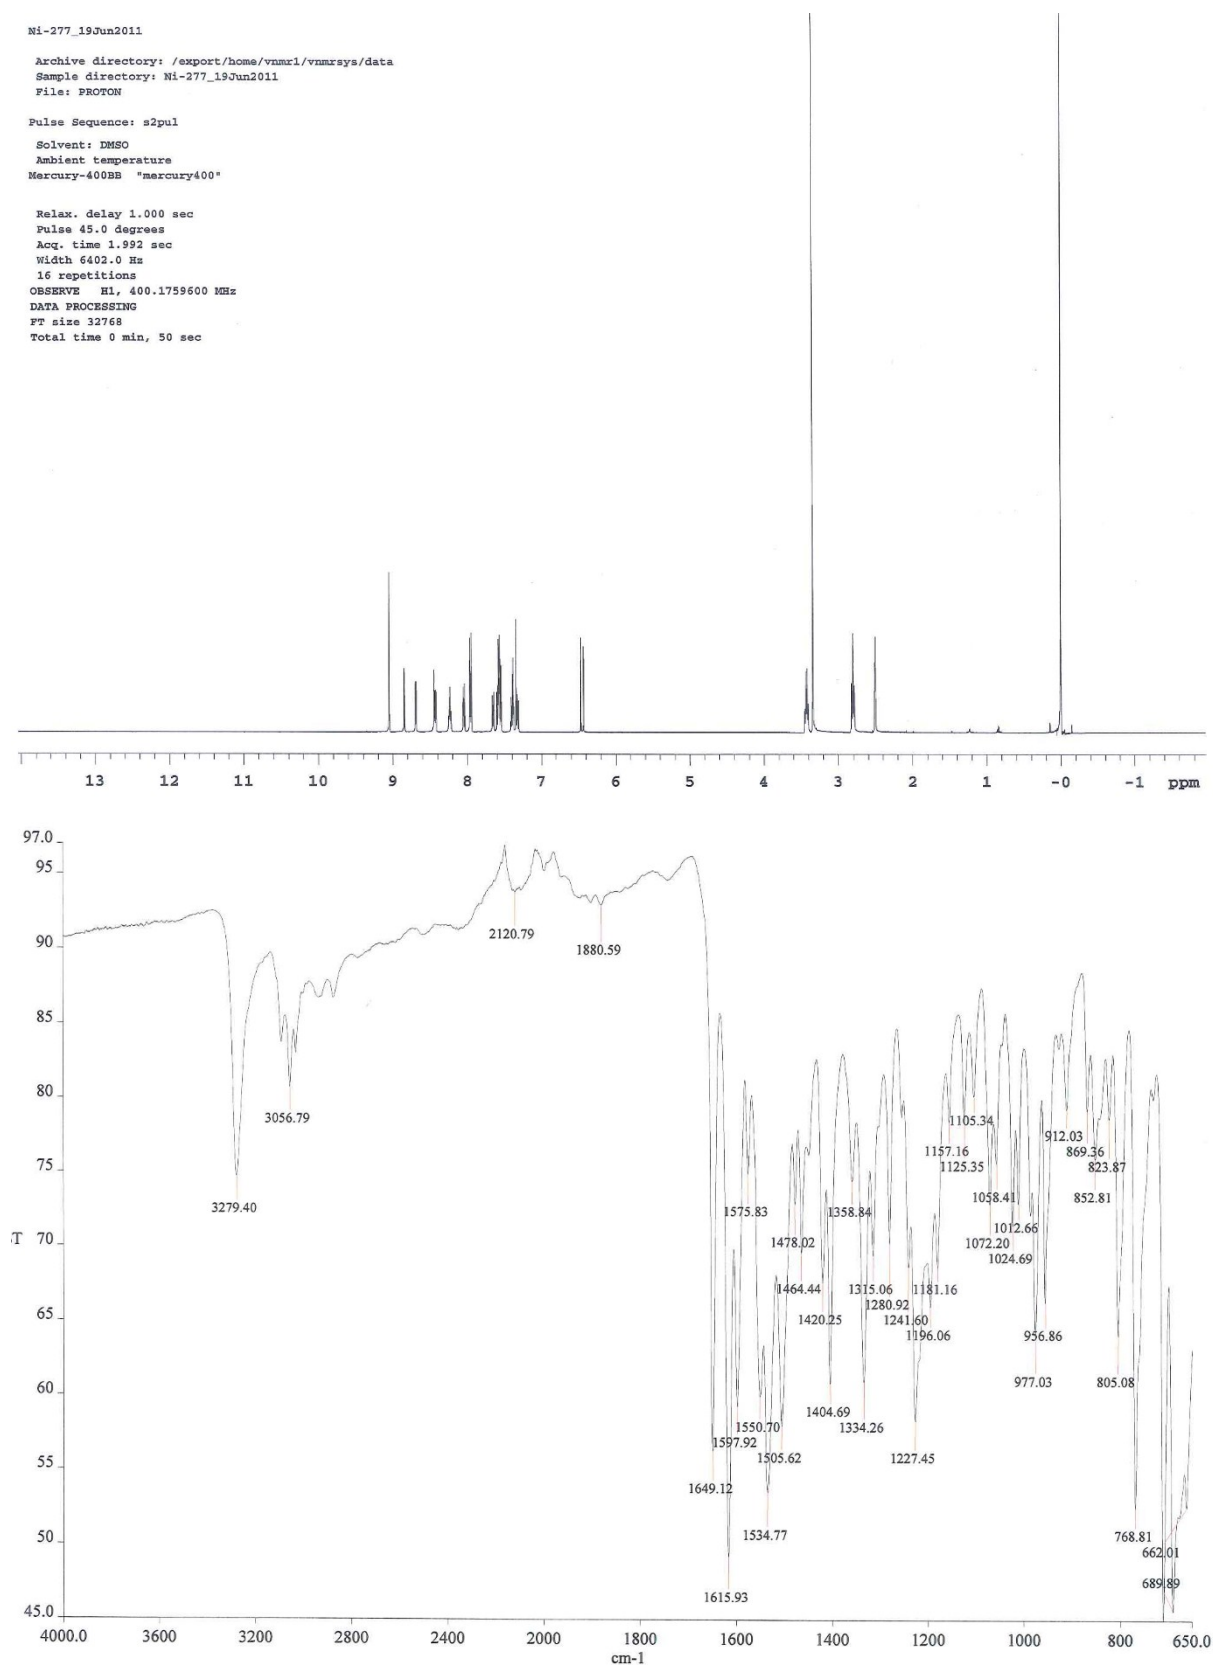

Single Mass Analysis

Tolerance = 5.0 PPM / DBE: min = -1.5, max = 50.0

Element prediction: Off

Number of isotope peaks used for i-FIT = 3

Monoisotopic Mass, Even Electron Ions

134 formula(e) evaluated with 2 results within limits (up to 50 closest results for each mass)

Elements Used:

C: 1-40 H: 1-40 N: 1-8 O: 1-5

NI-277 49 (1.917) Cm (49:52)

1: TOF MS ES+

3.80e+005

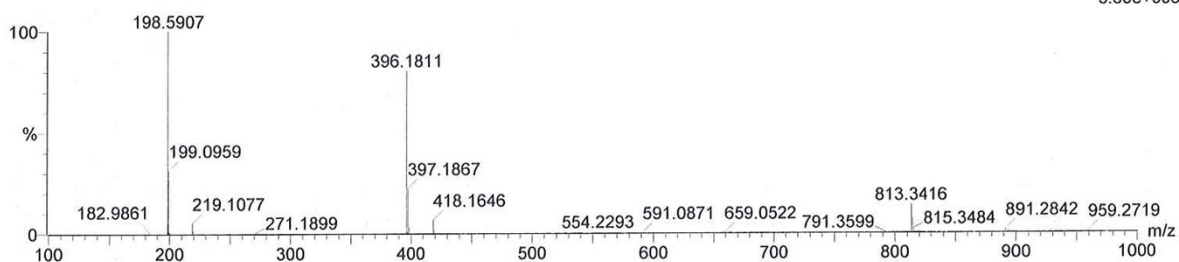

Minimum: -1.5  
Maximum: 5.0 5.0 50.0

| Mass     | Calc. Mass | mDa  | PPM  | DBE  | i-FIT | i-FIT (Norm) | Formula      |
|----------|------------|------|------|------|-------|--------------|--------------|
| 396.1811 | 396.1811   | 0.0  | 0.0  | 11.5 | 405.9 | 1.2          | C23 H26 N O5 |
|          | 396.1824   | -1.3 | -3.3 | 16.5 | 405.1 | 0.4          | C24 H22 N5 O |

Figure S18. Spectral data of Compound 5i

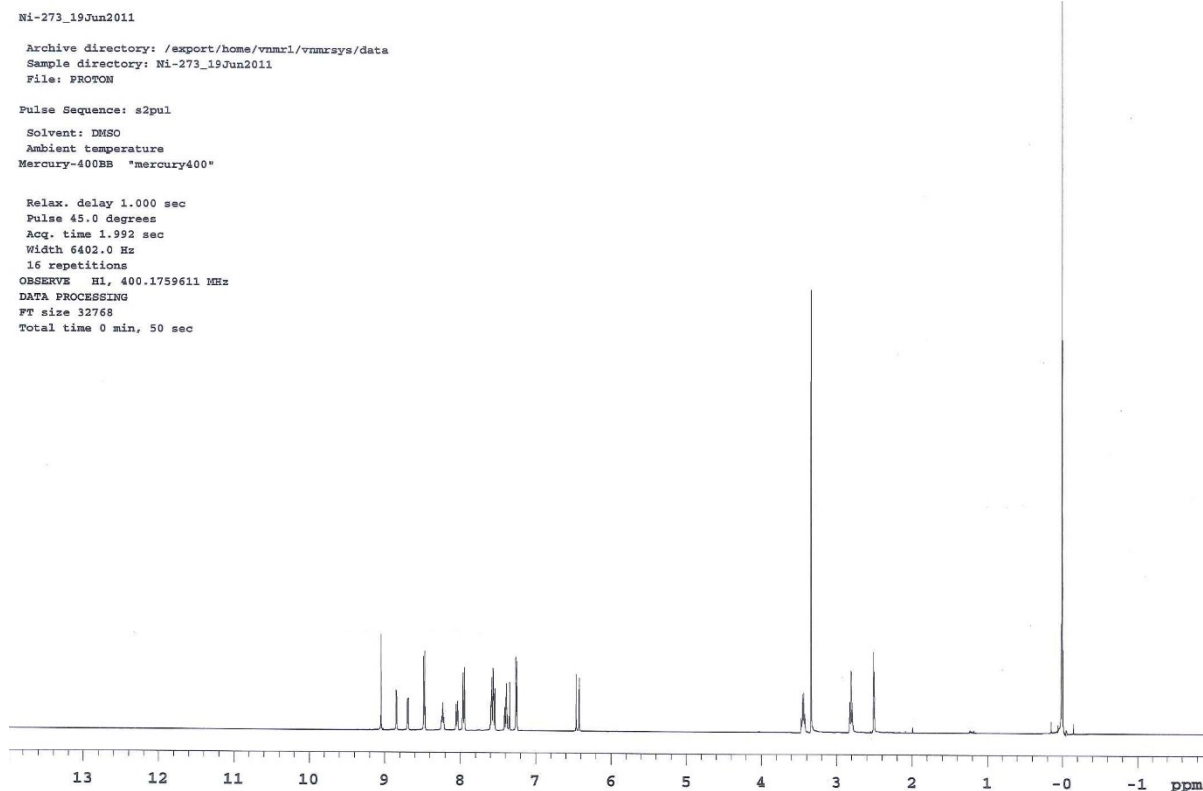

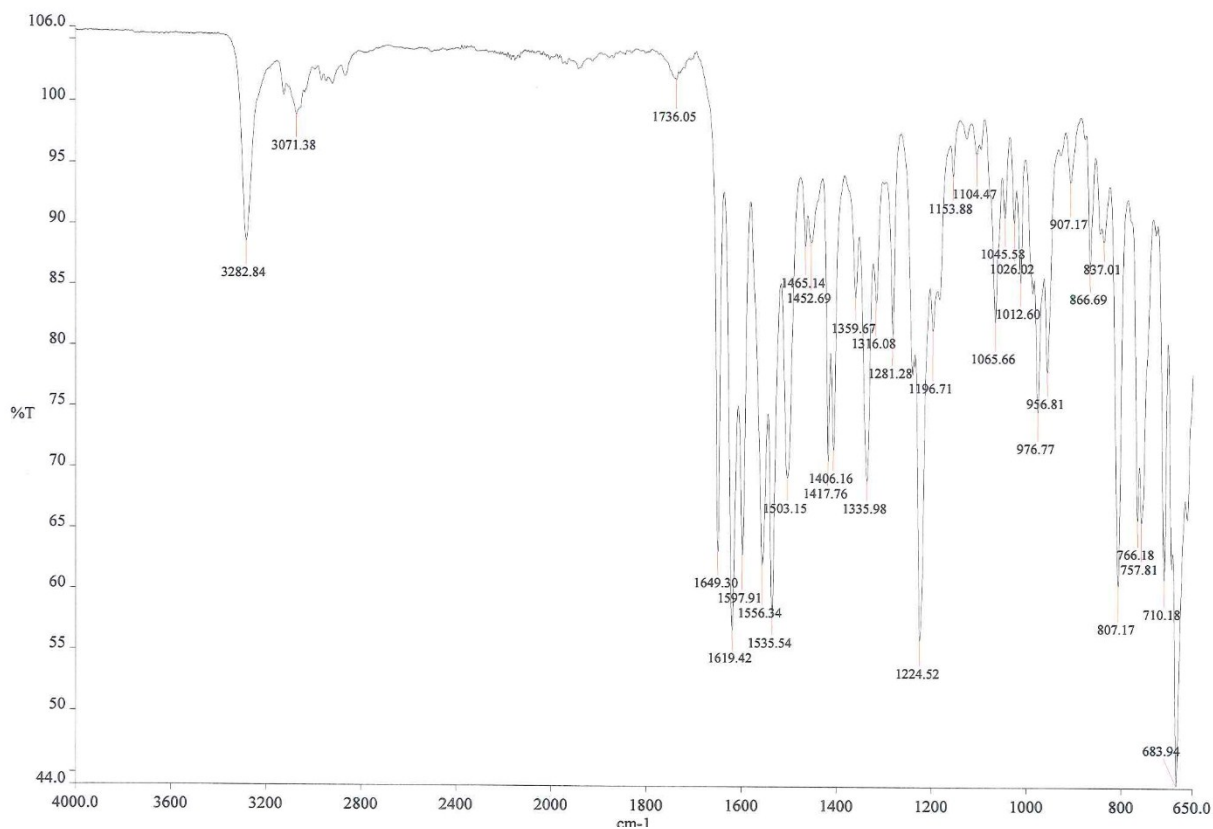

**Elemental Composition Report**

**Single Mass Analysis**

Tolerance = 5.0 PPM / DBE: min = -1.5, max = 50.0

Element prediction: Off

Number of isotope peaks used for i-FIT = 3

Monoisotopic Mass, Even Electron Ions

27 formula(e) evaluated with 1 results within limits (up to 50 closest results for each mass)

Elements Used:

C: 1-40 H: 1-40 N: 1-8 O: 1-1

NI-273 72 (2.794) Cm (71:73)

1: TOF MS ES+

1.22e+004

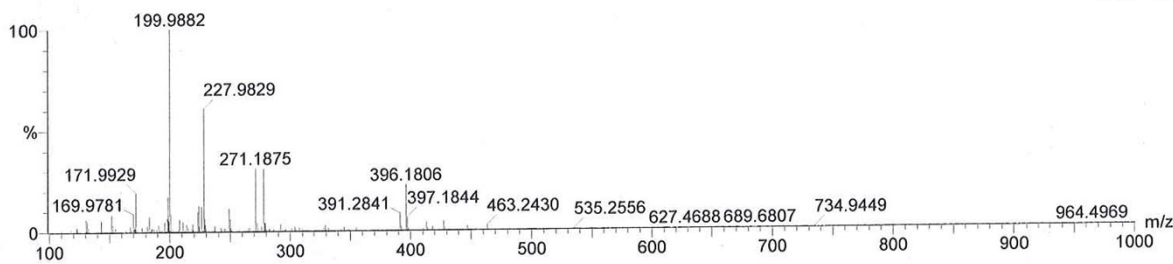

Minimum: -1.5  
Maximum: 5.0 5.0 50.0

| Mass     | Calc. Mass | mDa  | PPM  | DBE  | i-FIT | i-FIT (Norm) | Formula      |
|----------|------------|------|------|------|-------|--------------|--------------|
| 396.1806 | 396.1824   | -1.8 | -4.5 | 16.5 | 115.8 | 0.0          | C24 H22 N5 O |



**Figure S19.** Spectral data of Compound 5j

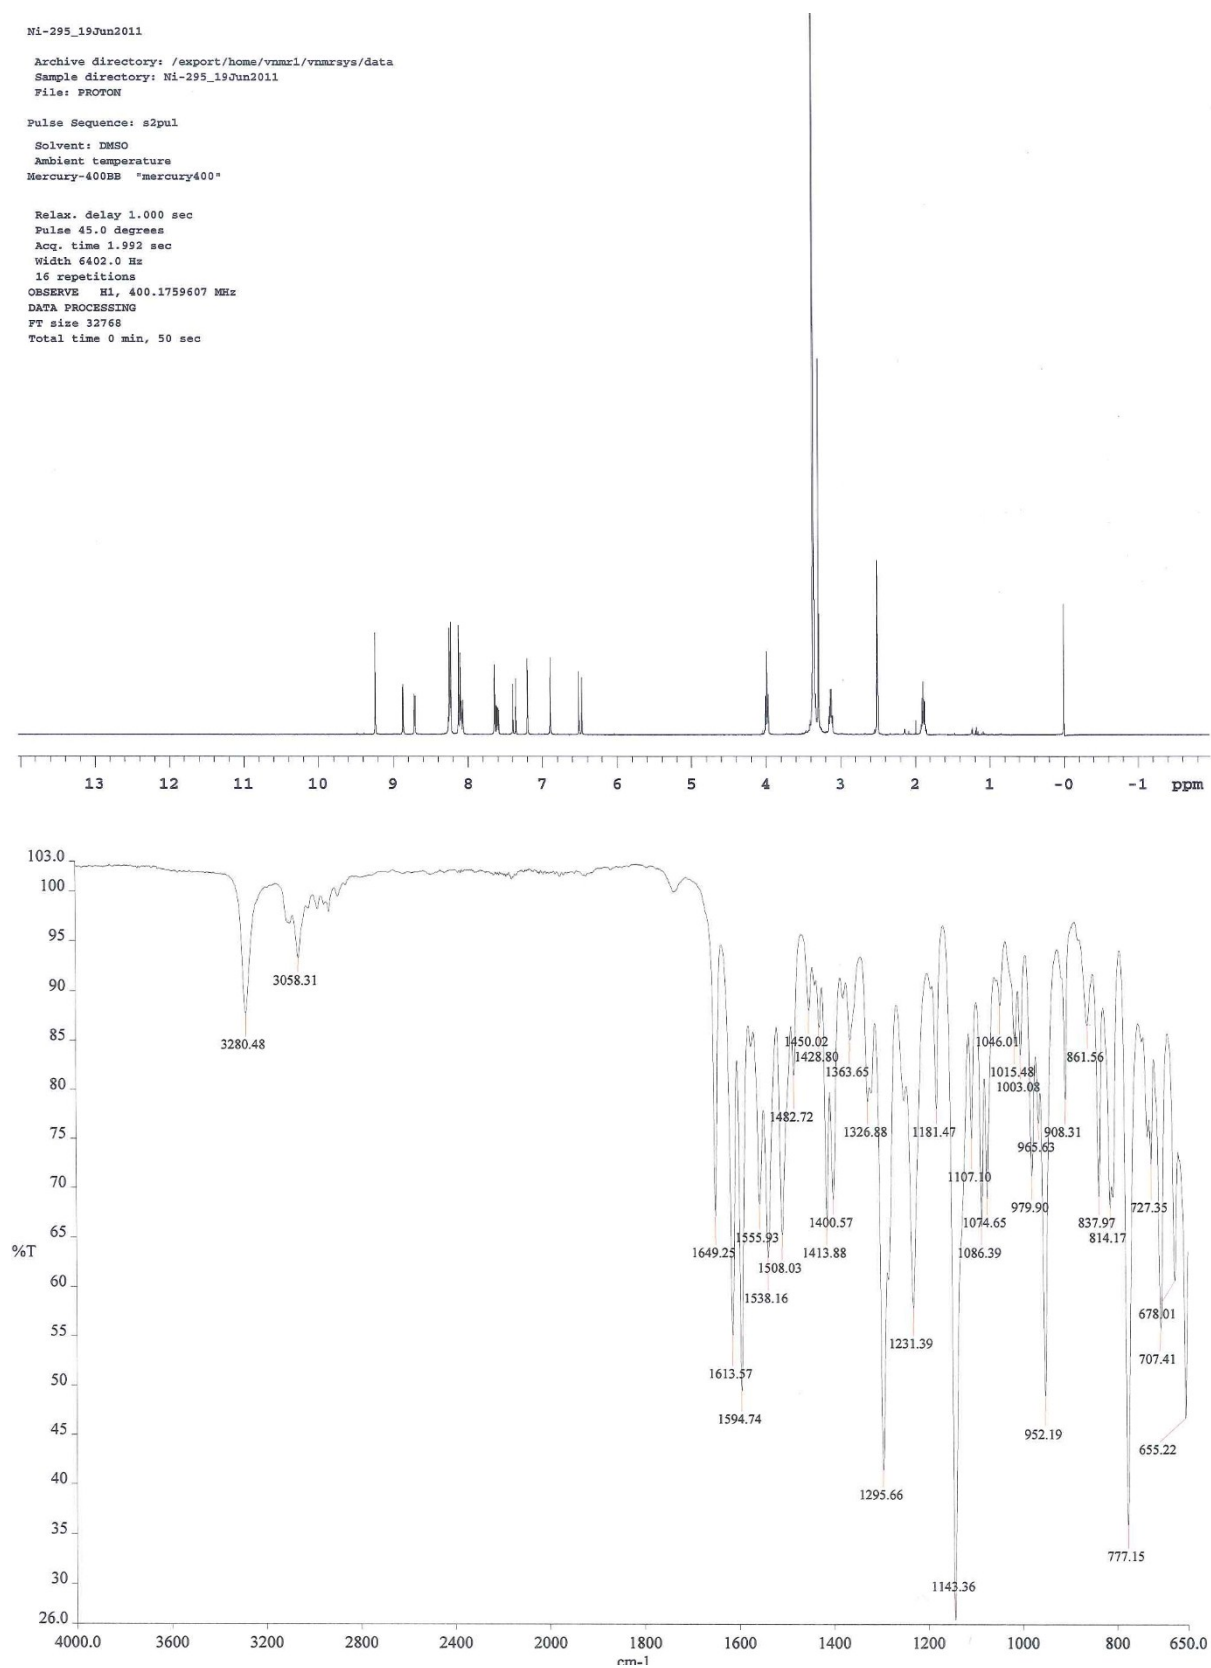

Single Mass Analysis

Tolerance = 5.0 PPM / DBE: min = -1.5, max = 50.0

Element prediction: Off

Number of isotope peaks used for i-FIT = 3

Monoisotopic Mass, Even Electron Ions

399 formula(e) evaluated with 2 results within limits (up to 50 closest results for each mass)

Elements Used:

C: 1-50 H: 1-50 N: 1-8 O: 1-6 S: 1-2

NI-295-2 41 (1.605)

1: TOF MS ES+

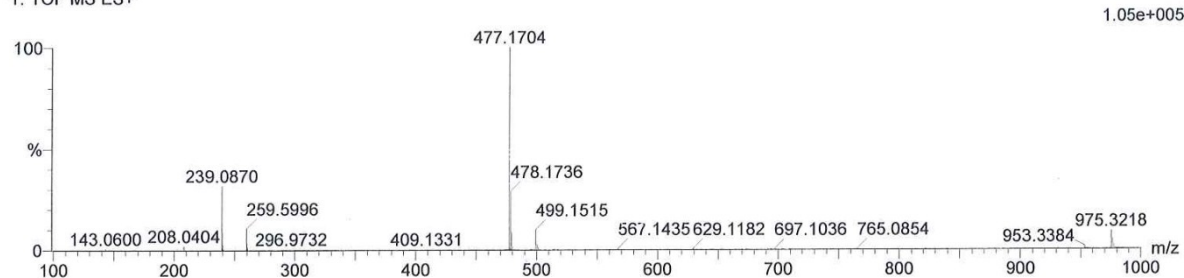

Minimum: -1.5  
Maximum: 5.0 5.0 50.0

| Mass     | Calc. Mass | mDa  | PPM  | DBE  | i-FIT | i-FIT (Norm) | Formula          |
|----------|------------|------|------|------|-------|--------------|------------------|
| 477.1704 | 477.1702   | 0.2  | 0.4  | 6.5  | 240.9 | 10.6         | C16 H29 N8 O5 S2 |
|          | 477.1709   | -0.5 | -1.0 | 15.5 | 230.3 | 0.0          | C24 H25 N6 O3 S  |

Figure S20. Spectral data of Compound 5k

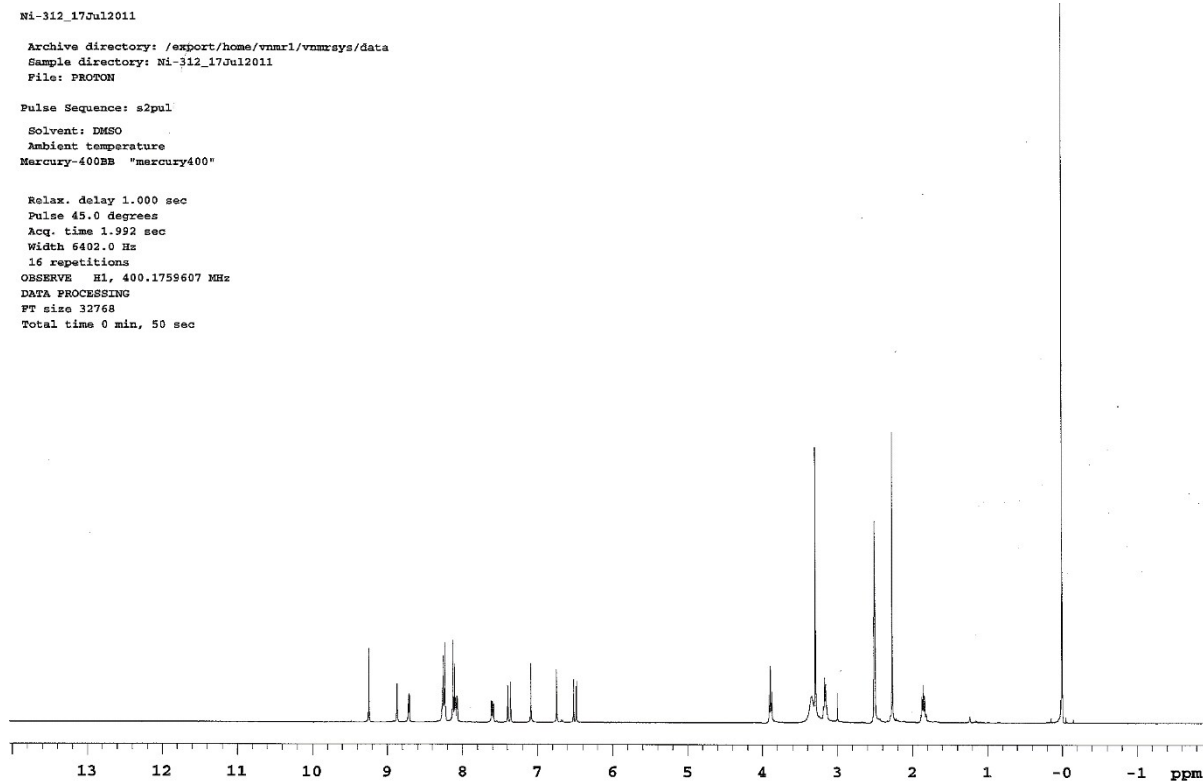

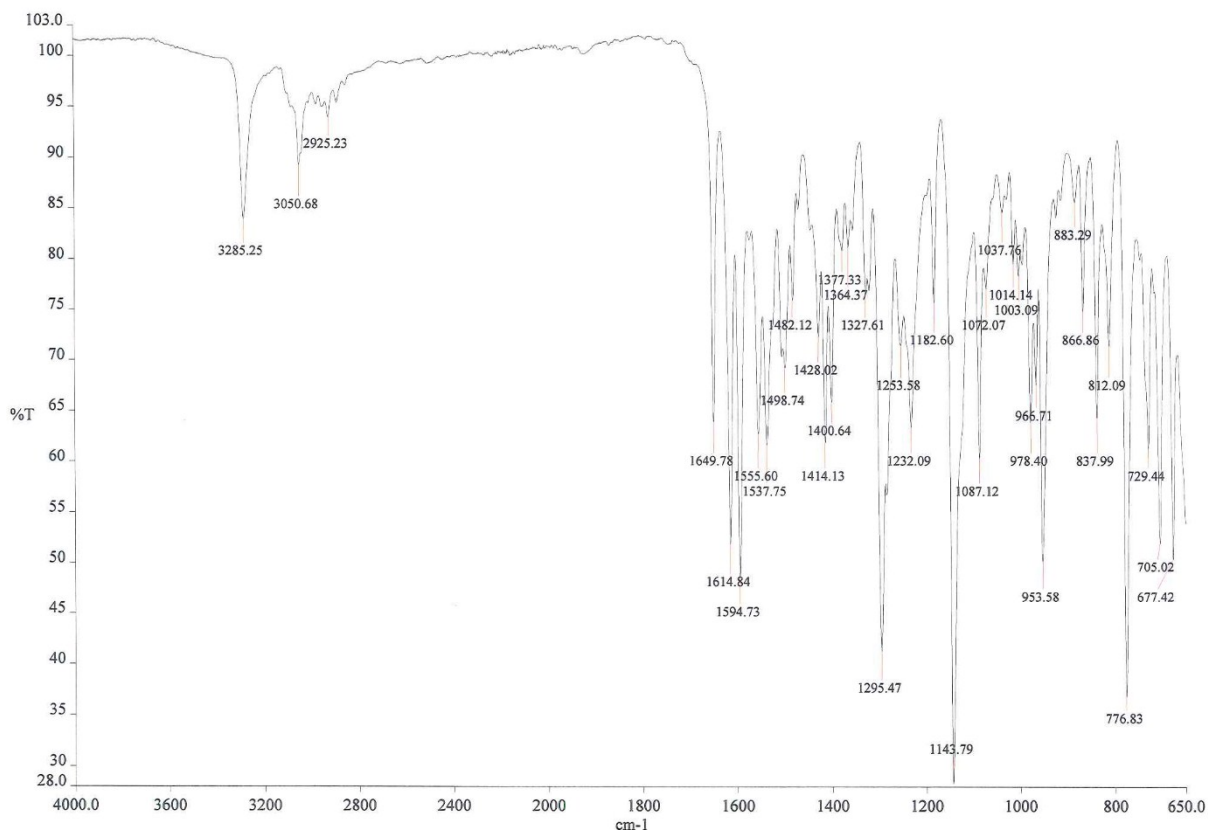

**Elemental Composition Report**

**Single Mass Analysis**

Tolerance = 5.0 PPM / DBE: min = -1.5, max = 50.0

Element prediction: Off

Number of isotope peaks used for i-FIT = 3

Monoisotopic Mass, Even Electron Ions

180 formula(e) evaluated with 2 results within limits (up to 50 closest results for each mass)

Elements Used:

C: 1-29 H: 1-50 N: 1-9 O: 1-3 S: 1-2

NI-312 47 (1.821) Cm (47:49)

1: TOF MS ES+

5.92e+004

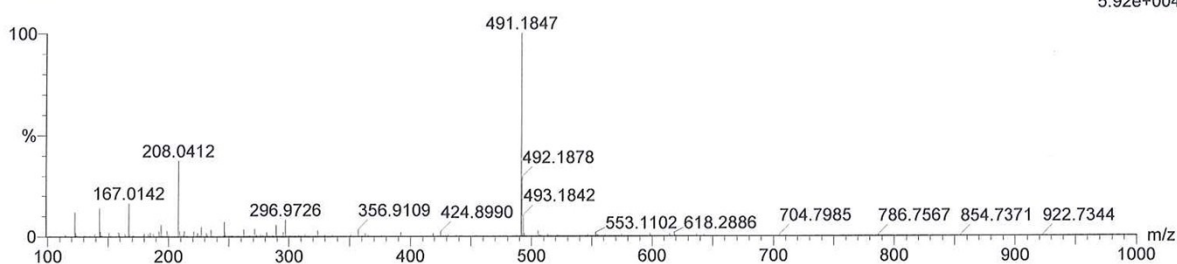

Minimum: -1.5  
Maximum: 5.0 5.0 50.0

| Mass     | Calc. Mass | mDa  | PPM  | DBE  | i-FIT | i-FIT (Norm) | Formula          |
|----------|------------|------|------|------|-------|--------------|------------------|
| 491.1847 | 491.1865   | -1.8 | -3.7 | 15.5 | 185.9 | 0.1          | C25 H27 N6 O3 S  |
|          | 491.1827   | 2.0  | 4.1  | 14.5 | 188.8 | 2.9          | C28 H31 N2 O2 S2 |

# Figure S21. Spectral data of Compound 5I

Ni-313\_17Jul2011

Archive directory: /export/home/vnmr1/vnmrsys/data  
Sample directory: Ni-313\_17Jul2011  
File: PROTON

Pulse Sequence: s2pul  
Solvent: DMSO  
Ambient temperature  
Mercury-400BB "mercury400"

Relax. delay 1.000 sec  
Pulse 45.0 degrees  
Acq. time 1.992 sec  
Width 6402.0 Hz  
16 repetitions  
OBSERVE H1, 400.1759600 MHz  
DATA PROCESSING  
FT size 32768  
Total time 0 min, 50 sec

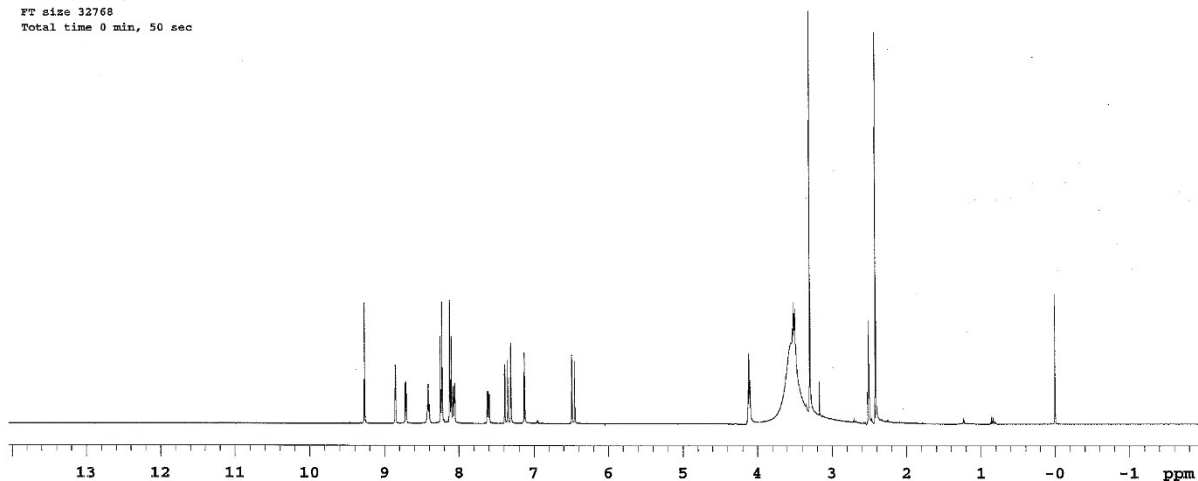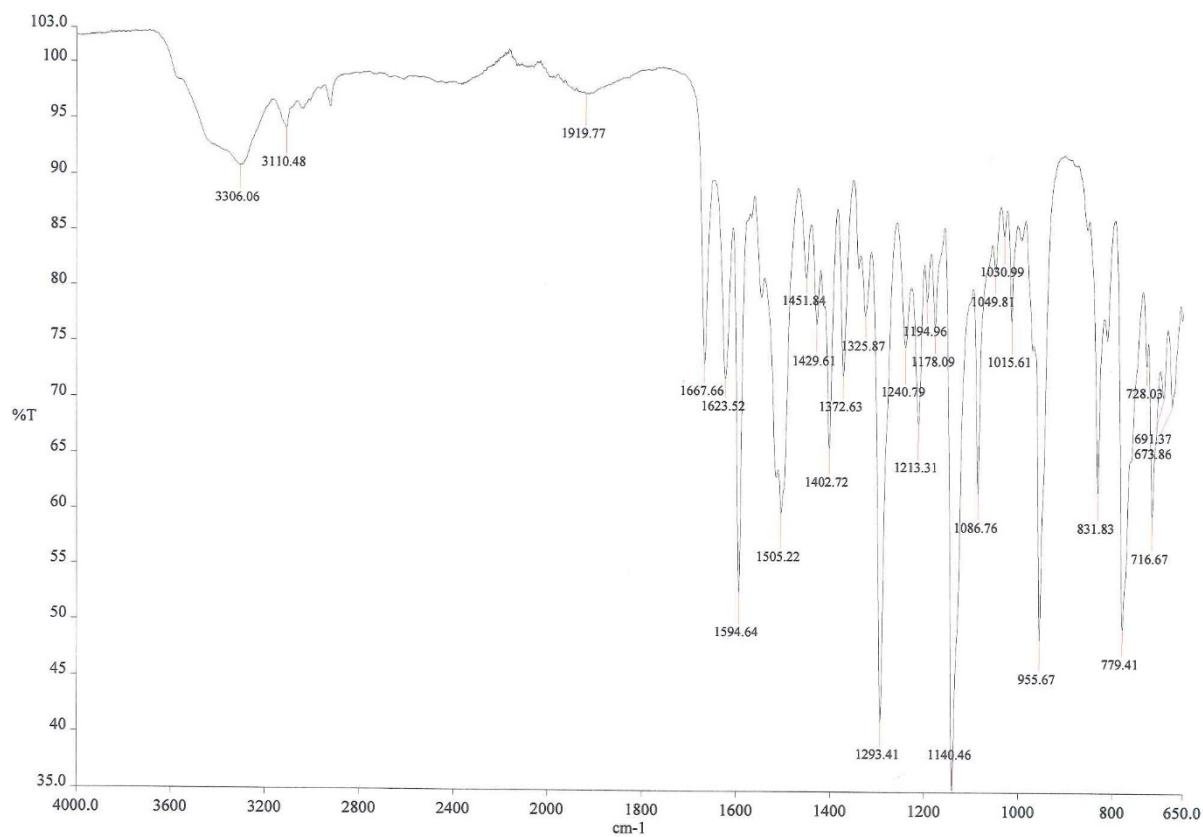

Single Mass Analysis

Tolerance = 5.0 PPM / DBE: min = -1.5, max = 50.0

Element prediction: Off

Number of isotope peaks used for i-FIT = 3

Monoisotopic Mass, Even Electron Ions

196 formula(e) evaluated with 1 results within limits (up to 50 closest results for each mass)

Elements Used:

C: 1-29 H: 1-50 N: 1-9 O: 1-3 S: 1-2

NI-313 44 (1.696) Cm (44:46)

1: TOF MS ES+

1.75e+005

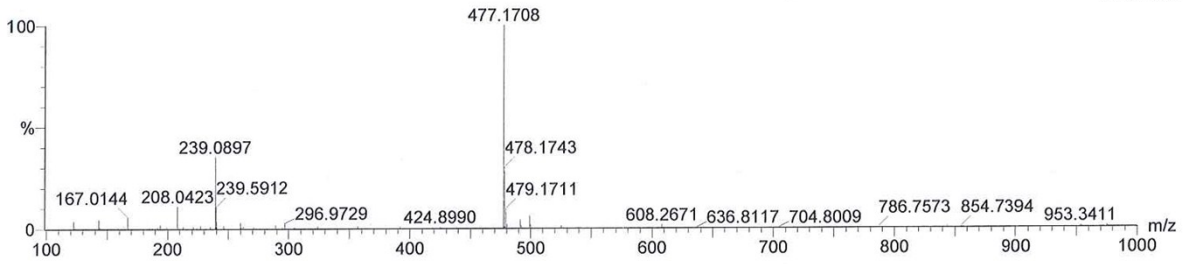

Minimum:

Maximum: 5.0 5.0 -1.5 50.0

| Mass     | Calc. Mass | mDa  | PPM  | DBE  | i-FIT | i-FIT (Norm) | Formula         |
|----------|------------|------|------|------|-------|--------------|-----------------|
| 477.1708 | 477.1709   | -0.1 | -0.2 | 15.5 | 329.5 | 0.0          | C24 H25 N6 O3 S |

Figure S22. Spectral data of Compound 5m

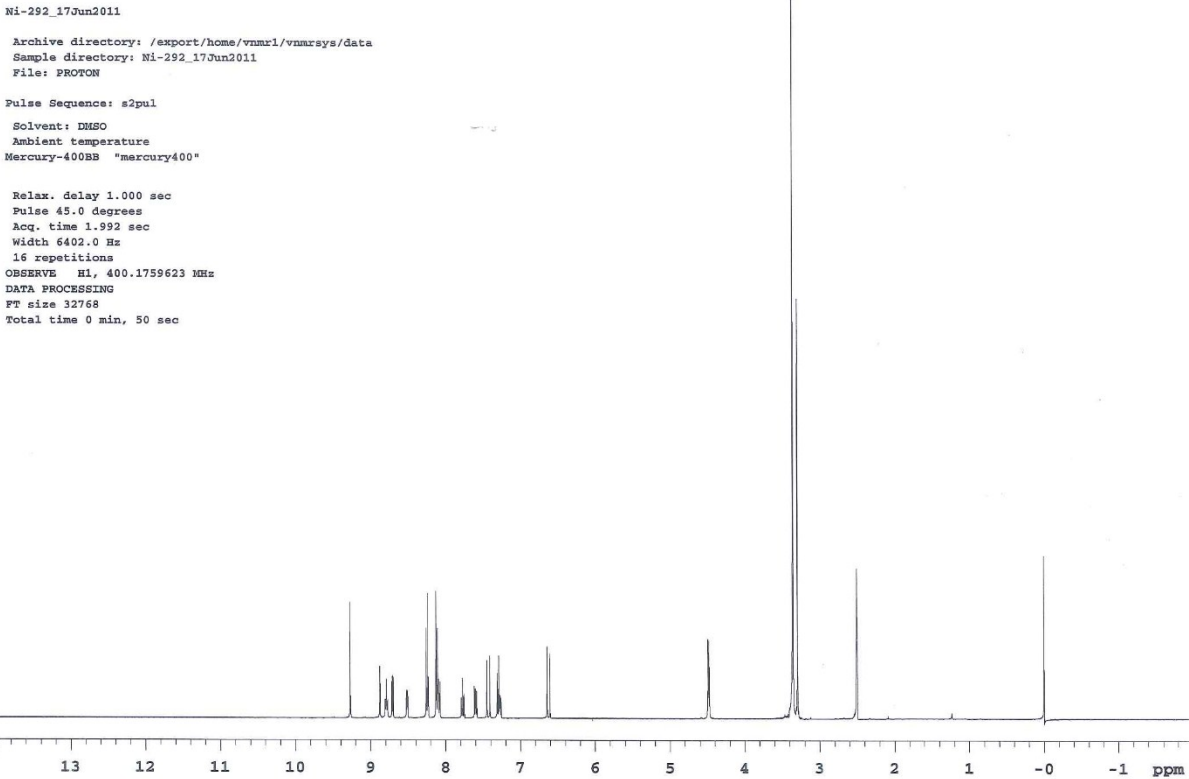

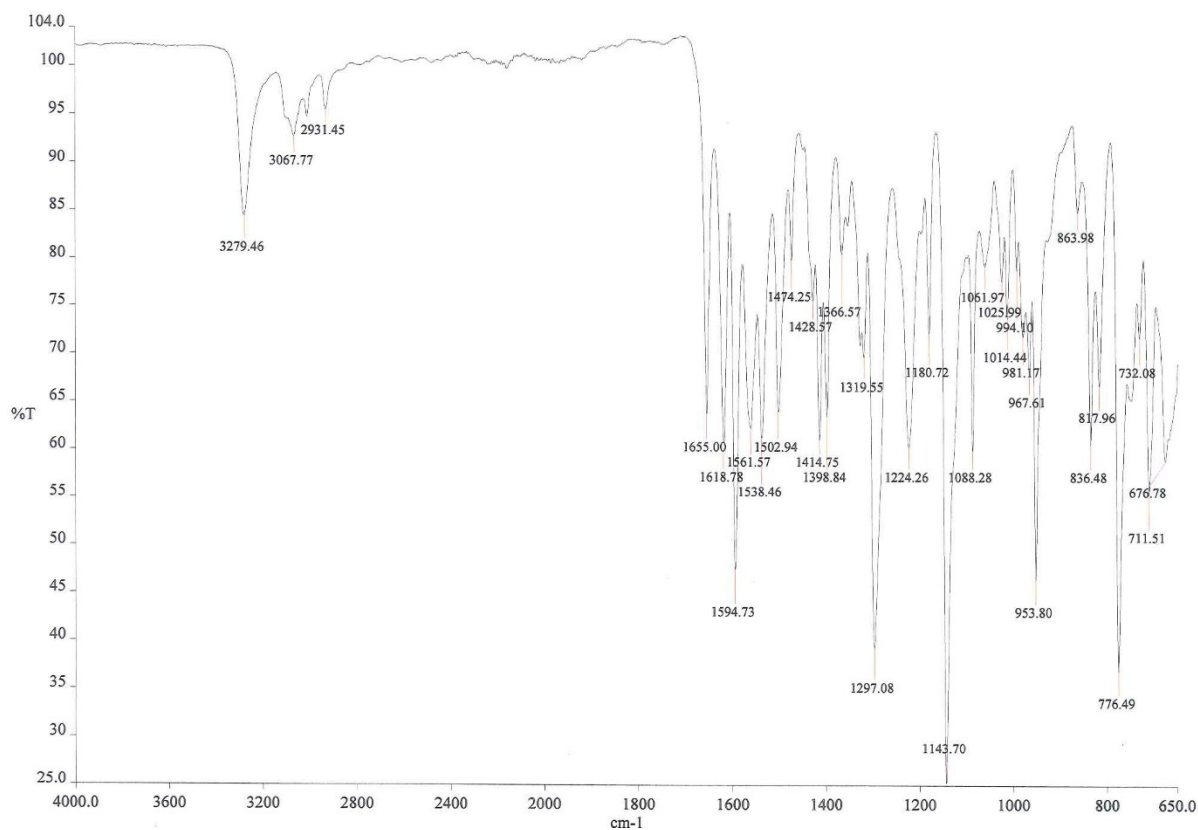

**Elemental Composition Report**

**Single Mass Analysis**

Tolerance = 5.0 PPM / DBE: min = -1.5, max = 50.0

Element prediction: Off

Number of isotope peaks used for i-FIT = 3

Monoisotopic Mass, Even Electron Ions

395 formula(e) evaluated with 2 results within limits (up to 50 closest results for each mass)

Elements Used:

C: 1-50 H: 1-50 N: 1-8 O: 1-6 S: 1-2

NI-292 36 (1.382)

1: TOF MS ES+

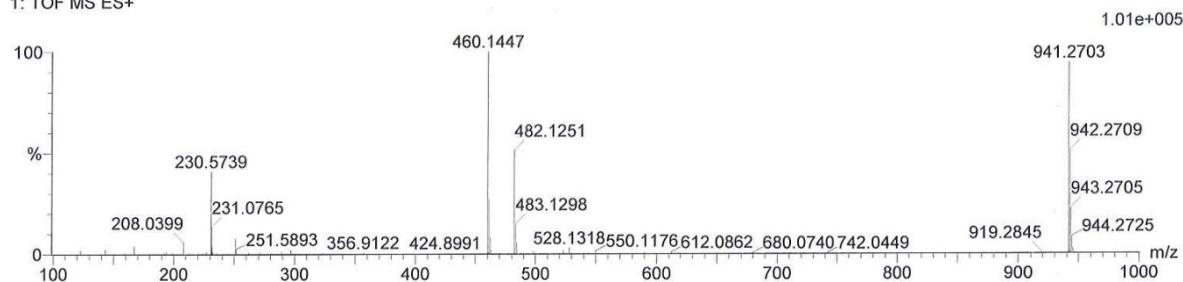

Minimum: -1.5  
Maximum: 5.0 5.0 50.0

| Mass     | Calc. Mass | mDa | PPM | DBE  | i-FIT | i-FIT (Norm) | Formula          |
|----------|------------|-----|-----|------|-------|--------------|------------------|
| 460.1447 | 460.1443   | 0.4 | 0.9 | 16.5 | 235.6 | 0.0          | C24 H22 N5 O3 S  |
|          | 460.1437   | 1.0 | 2.2 | 7.5  | 241.0 | 5.3          | C16 H26 N7 O5 S2 |

**Figure S23.** Spectral data of Compound 5n

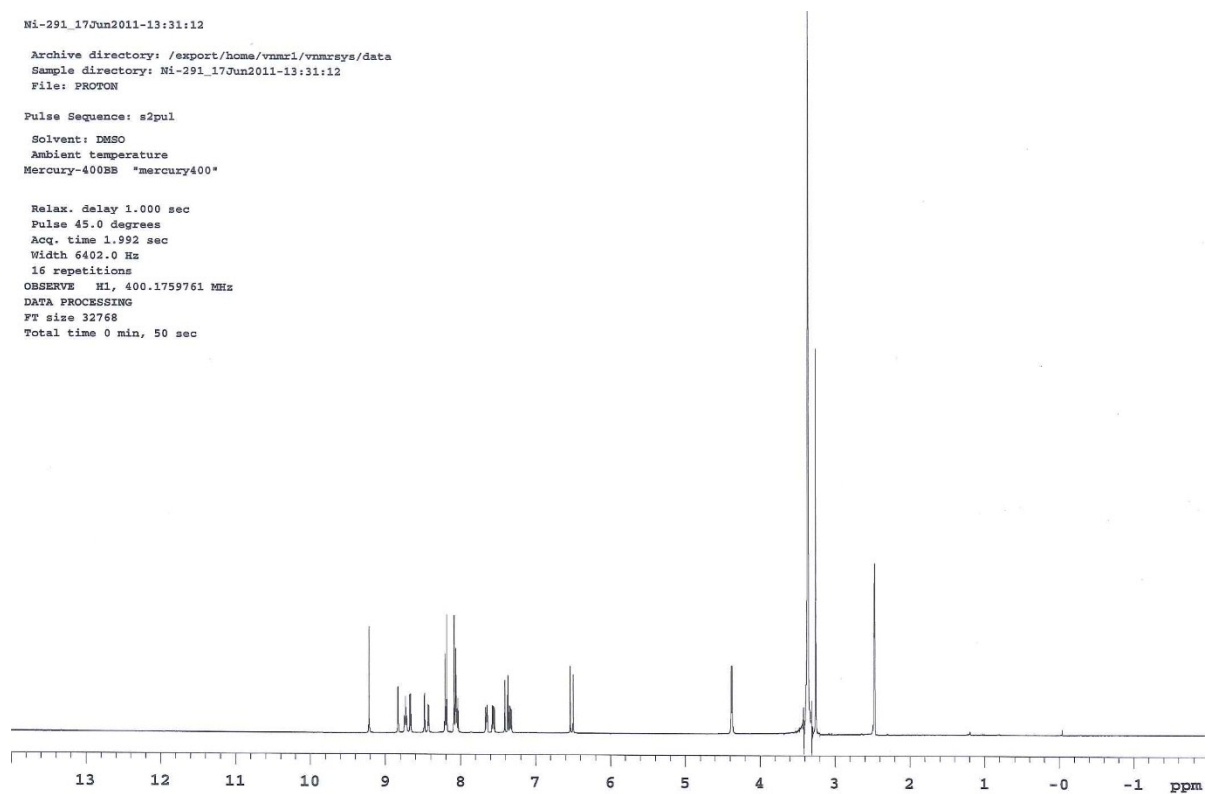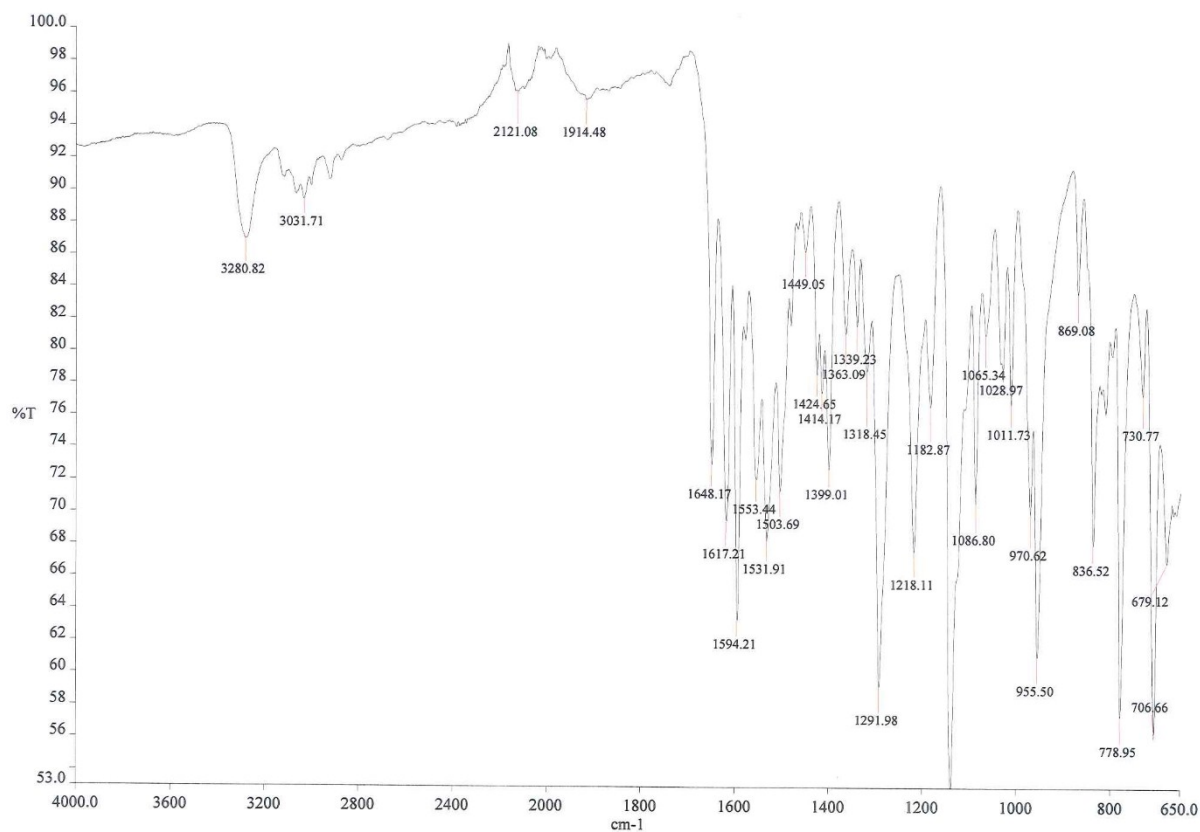

Single Mass Analysis

Tolerance = 5.0 PPM / DBE: min = -1.5, max = 50.0

Element prediction: Off

Number of isotope peaks used for i-FIT = 3

Monoisotopic Mass, Even Electron Ions

331 formula(e) evaluated with 1 results within limits (up to 50 closest results for each mass)

Elements Used:

C: 1-25 H: 1-25 N: 1-8 O: 1-6 S: 1-2 Ni: 0-1

NI-291 24 (0.912) Cm (21:26)

1: TOF MS ES+

2.67e+005

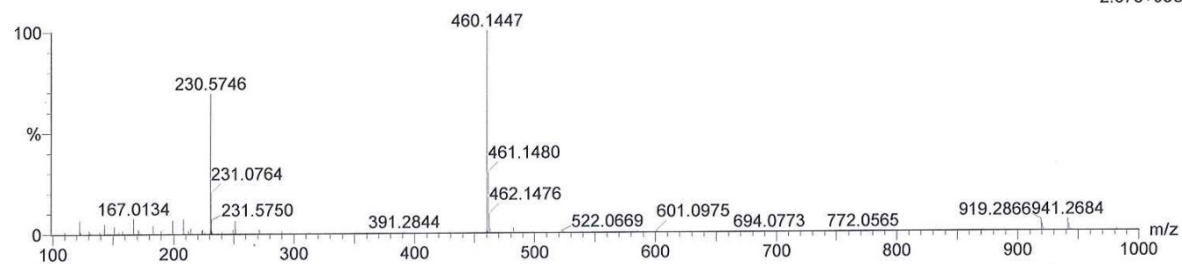

Minimum: -1.5  
Maximum: 5.0 5.0 50.0

| Mass     | Calc. Mass | mDa | PPM | DBE  | i-FIT | i-FIT (Norm) | Formula         |
|----------|------------|-----|-----|------|-------|--------------|-----------------|
| 460.1447 | 460.1443   | 0.4 | 0.9 | 16.5 | 485.1 | 0.0          | C24 H22 N5 O3 S |

Figure S24. Spectral data of Compound 5o

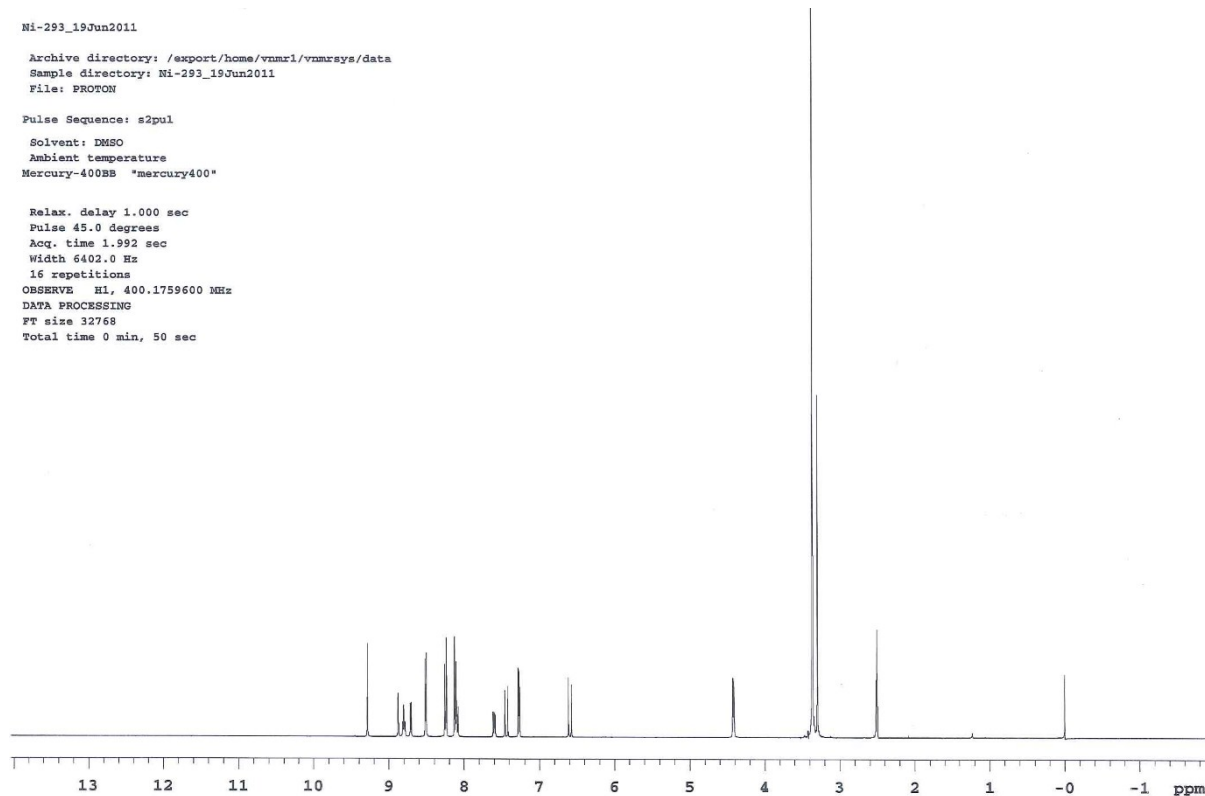



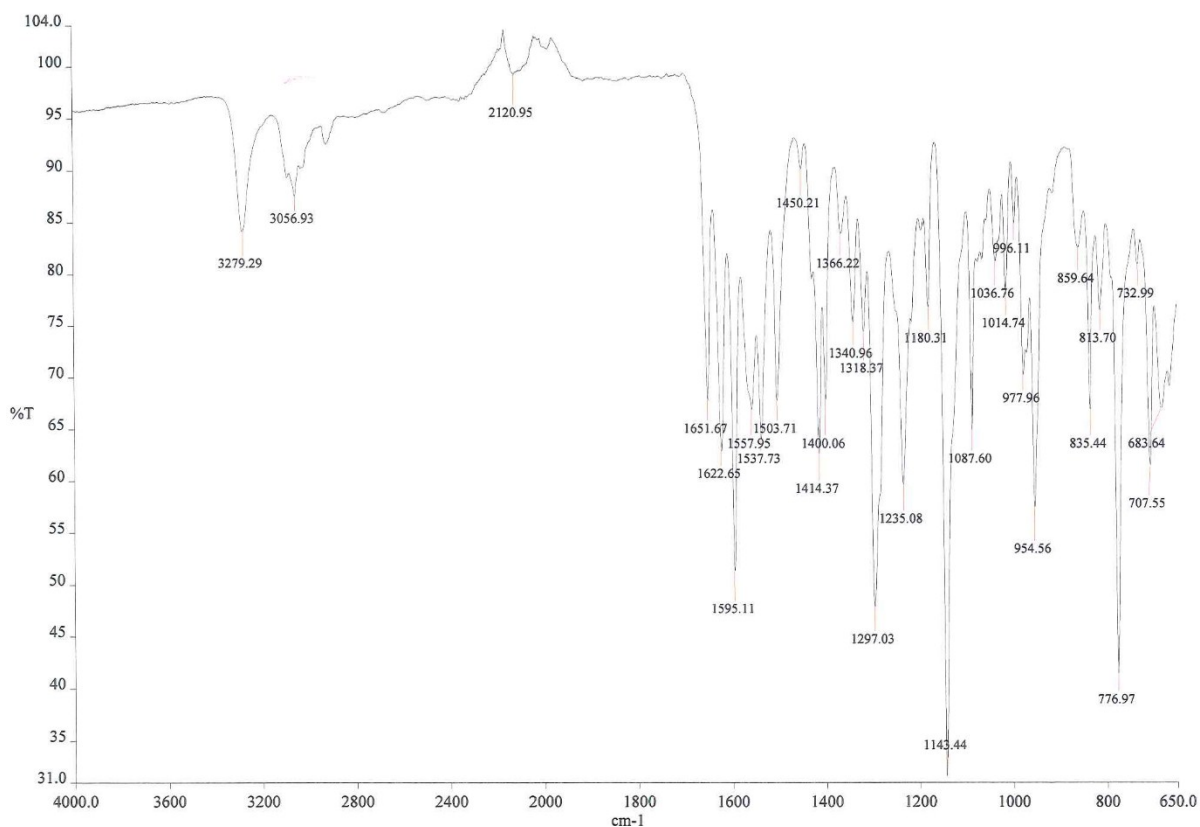

### Elemental Composition Report

#### Single Mass Analysis

Tolerance = 5.0 PPM / DBE: min = -1.5, max = 50.0

Element prediction: Off

Number of isotope peaks used for i-FIT = 3

Monoisotopic Mass, Even Electron Ions

395 formula(e) evaluated with 2 results within limits (up to 50 closest results for each mass)

Elements Used:

C: 1-50 H: 1-50 N: 1-8 O: 1-6 S: 1-2

NI-293-2 42 (1.635) Cm (42:44)

1: TOF MS ES+

4.34e+004

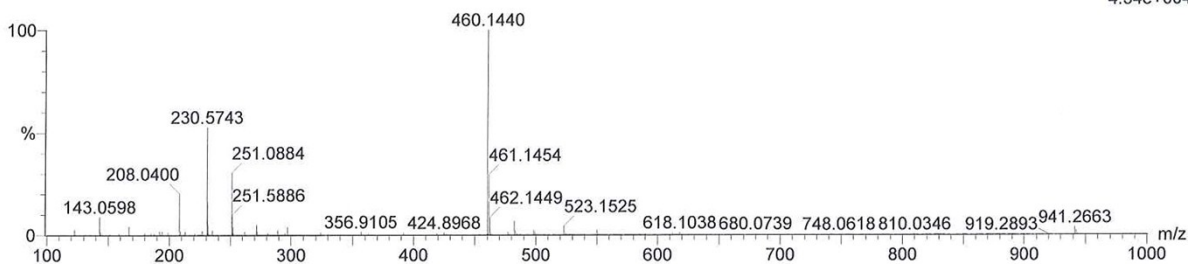

Minimum: -1.5  
Maximum: 5.0 5.0 50.0

| Mass     | Calc. Mass | mDa  | PPM  | DBE  | i-FIT | i-FIT (Norm) | Formula          |
|----------|------------|------|------|------|-------|--------------|------------------|
| 460.1440 | 460.1443   | -0.3 | -0.7 | 16.5 | 118.9 | 0.0          | C24 H22 N5 O3 S  |
|          | 460.1437   | 0.3  | 0.7  | 7.5  | 129.1 | 10.3         | C16 H26 N7 O5 S2 |

**Figure S25.** Spectral data of Compound 5p

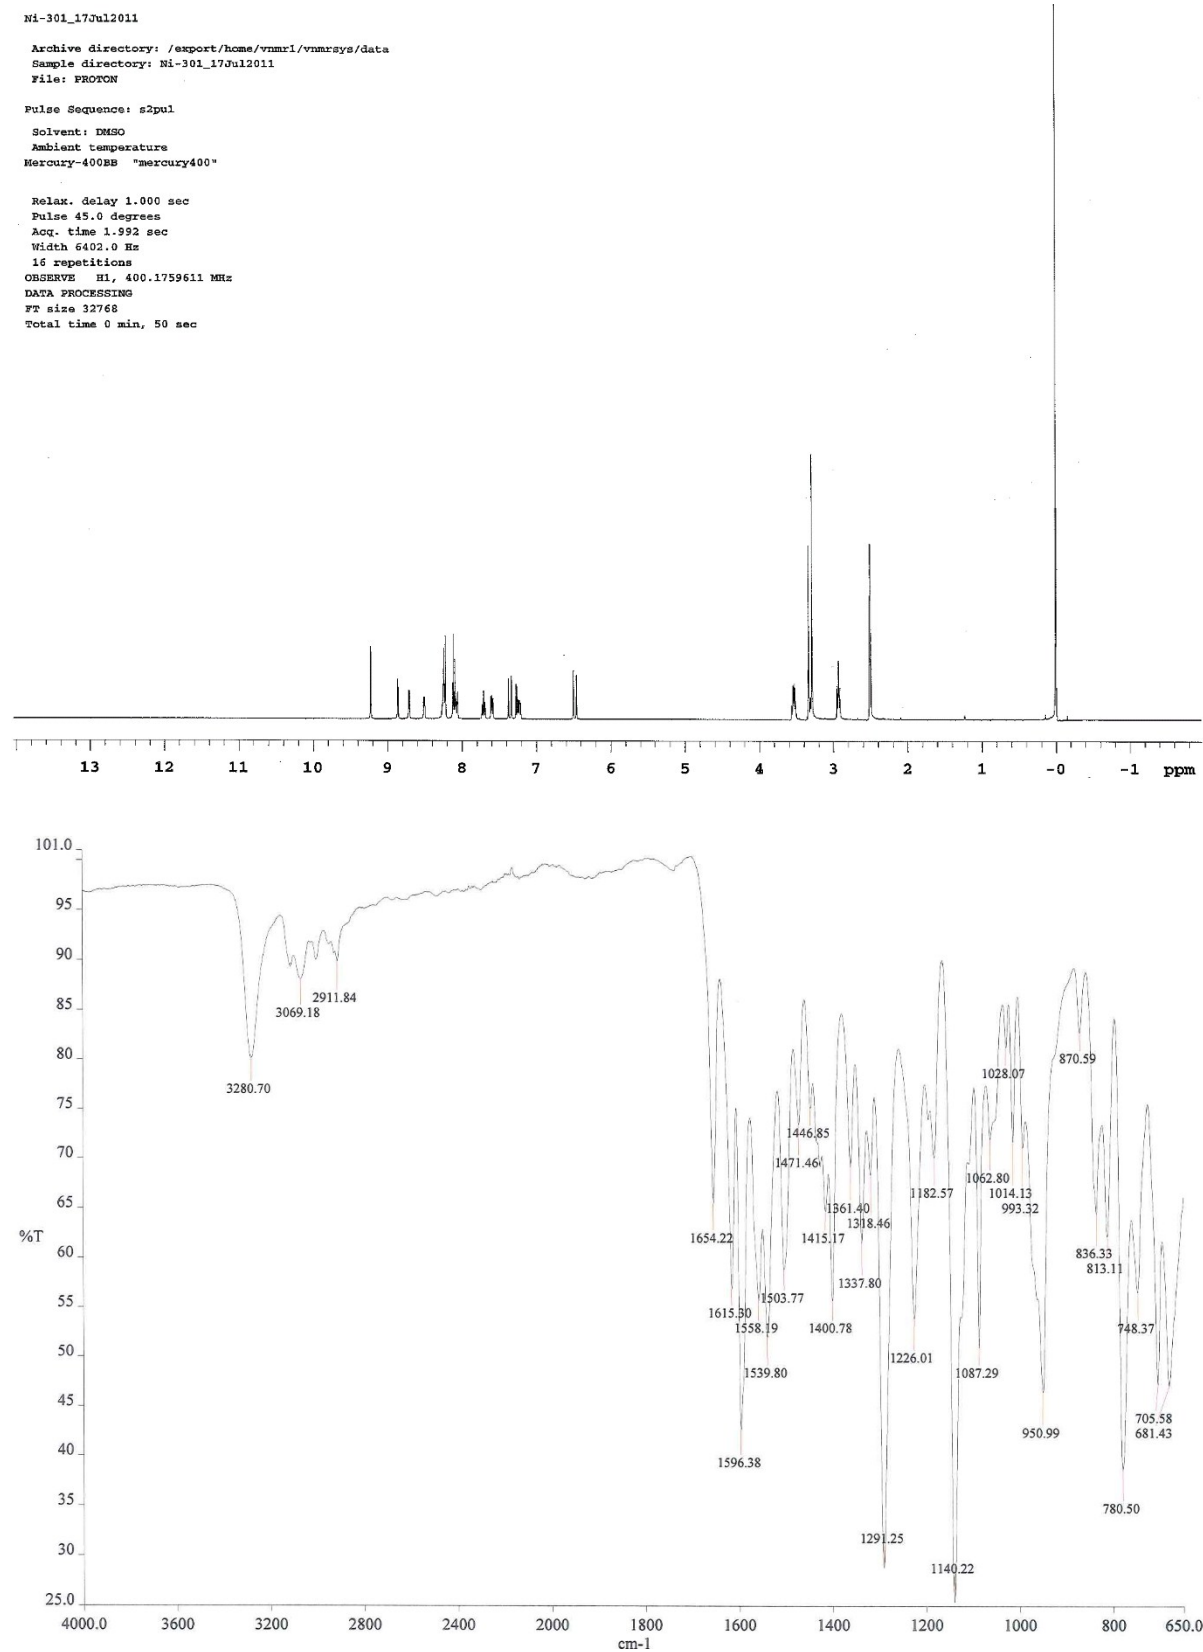

Single Mass Analysis

Tolerance = 5.0 PPM / DBE: min = -1.5, max = 50.0

Element prediction: Off

Number of isotope peaks used for i-FIT = 3

Monoisotopic Mass, Even Electron Ions

58 formula(e) evaluated with 1 results within limits (up to 50 closest results for each mass)

Elements Used:

C: 1-25 H: 1-33 N: 1-6 O: 1-4 S: 1-2

Ni-301 48 (1.851) Cm (48:52)

1: TOF MS ES+

2.40e+004

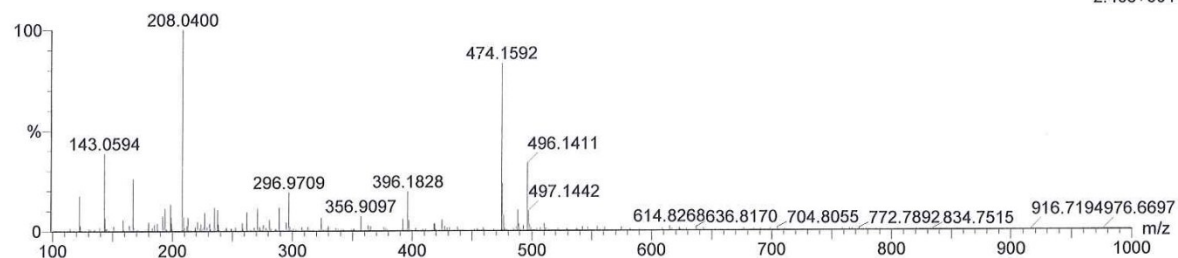

Minimum: -1.5  
Maximum: 5.0 5.0 50.0

| Mass     | Calc. Mass | mDa  | PPM  | DBE  | i-FIT | i-FIT (Norm) | Formula         |
|----------|------------|------|------|------|-------|--------------|-----------------|
| 474.1592 | 474.1600   | -0.8 | -1.7 | 16.5 | 202.8 | 0.0          | C25 H24 N5 O3 S |

Figure S26. Spectral data of Compound 5r

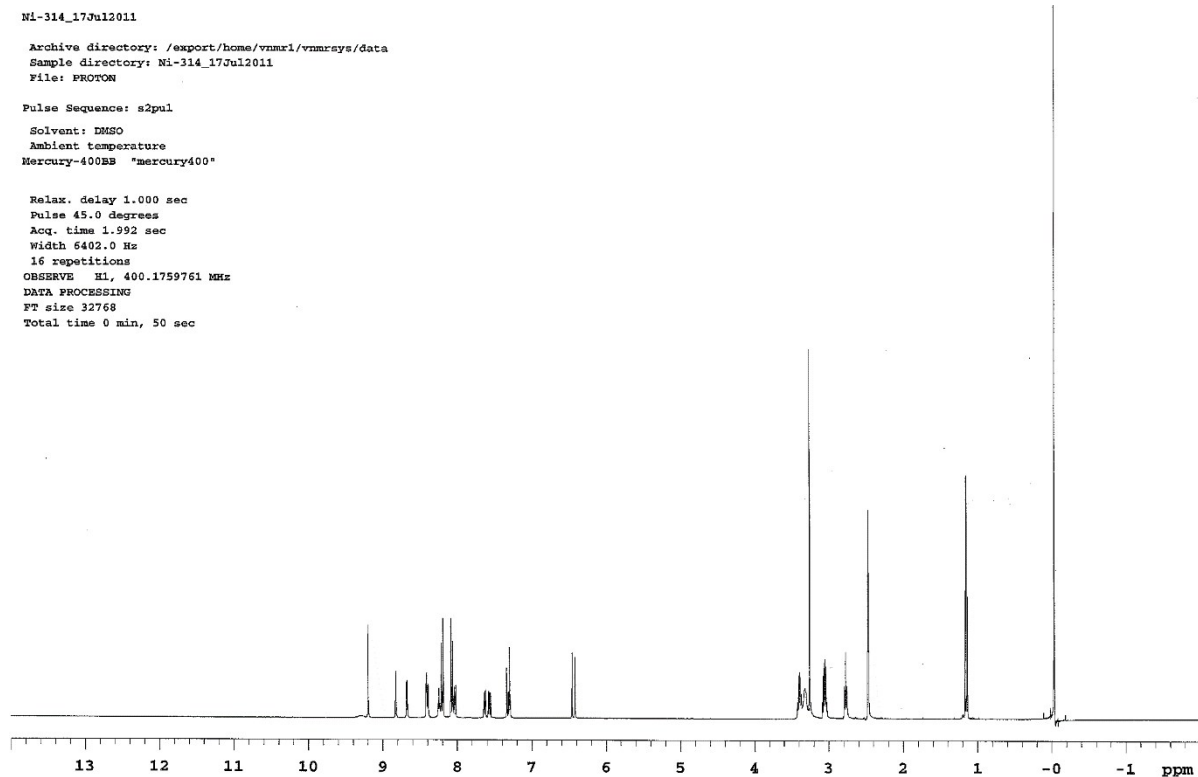

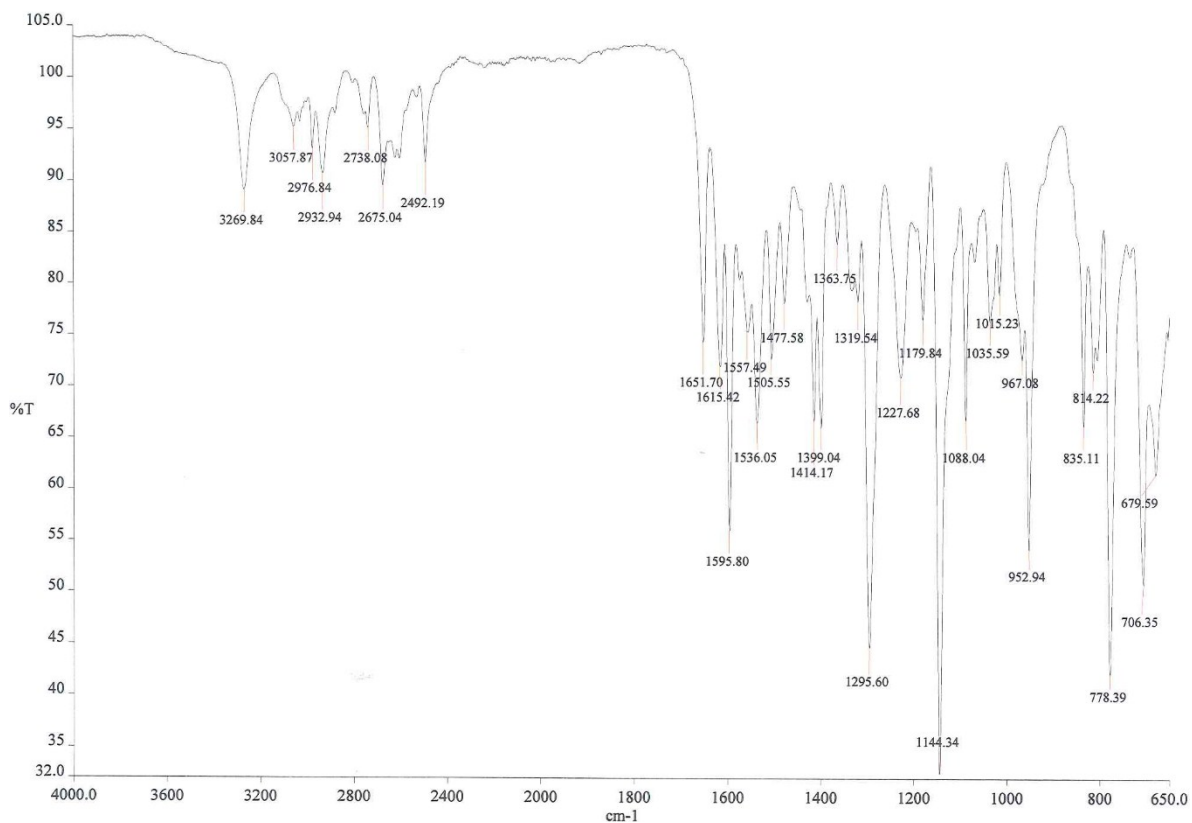

### Elemental Composition Report

#### Single Mass Analysis

Tolerance = 5.0 PPM / DBE: min = -1.5, max = 50.0

Element prediction: Off

Number of isotope peaks used for i-FIT = 3

Monoisotopic Mass, Even Electron Ions

200 formula(e) evaluated with 2 results within limits (up to 50 closest results for each mass)

Elements Used:

C: 1-29 H: 1-50 N: 1-9 O: 1-3 S: 1-2

NI-314 45 (1.758) Cm (45:48)

1: TOF MS ES+

2.86e+004

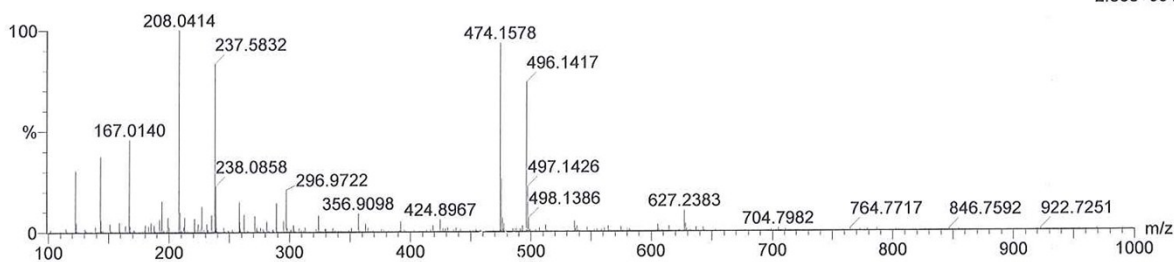

Minimum: -1.5  
Maximum: 5.0 5.0 50.0

| Mass     | Calc. Mass | mDa  | PPM  | DBE  | i-FIT | i-FIT (Norm) | Formula         |
|----------|------------|------|------|------|-------|--------------|-----------------|
| 474.1578 | 474.1561   | 1.7  | 3.6  | 15.5 | 208.7 | 3.4          | C28 H28 N O2 S2 |
|          | 474.1600   | -2.2 | -4.6 | 16.5 | 205.3 | 0.0          | C25 H24 N5 O3 S |

**Figure S27.** Spectral data of Compound 5s

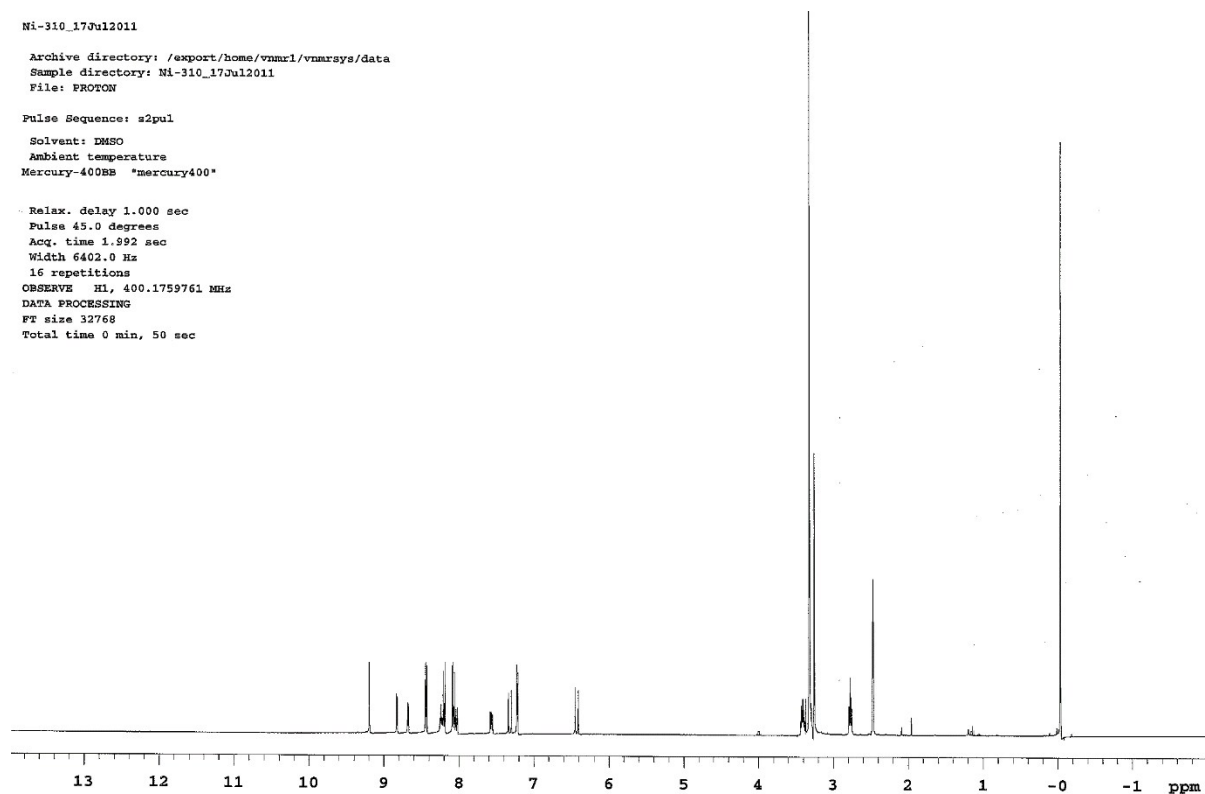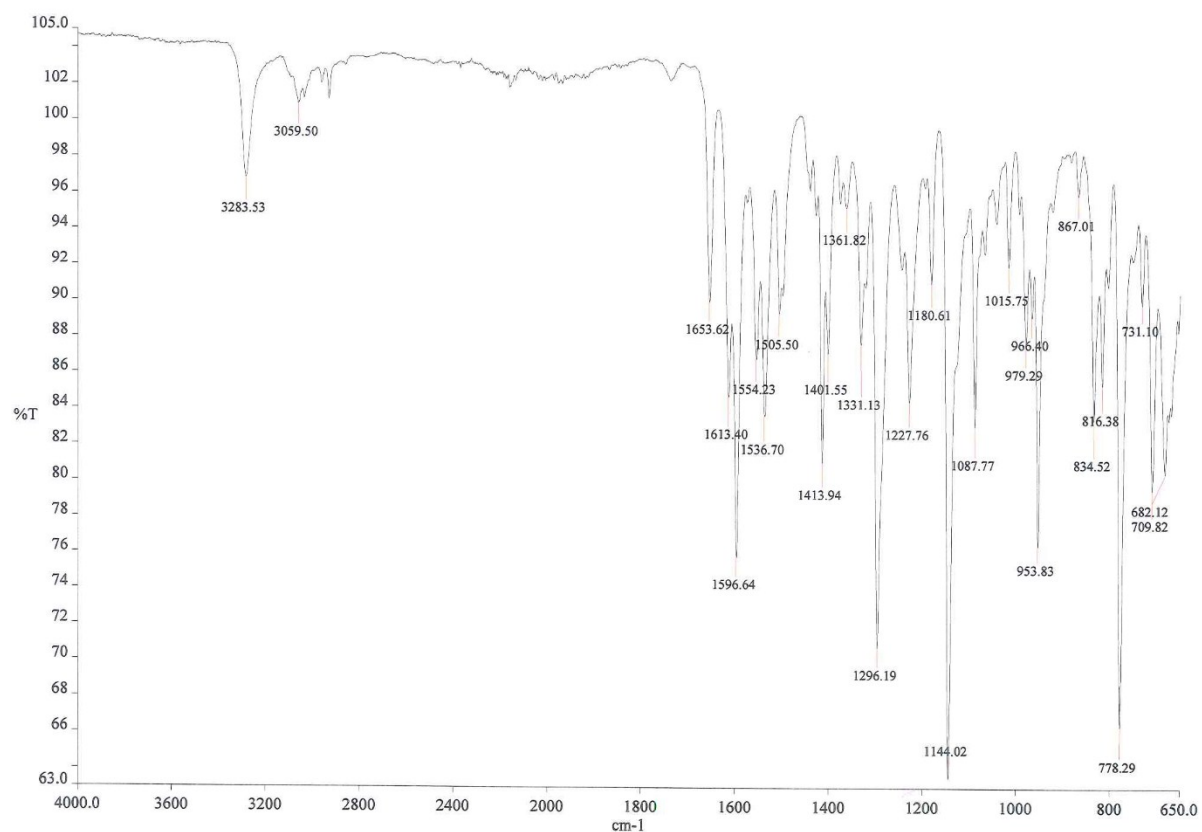

Single Mass Analysis

Tolerance = 5.0 PPM / DBE: min = -1.5, max = 50.0

Element prediction: Off

Number of isotope peaks used for i-FIT = 3

Monoisotopic Mass, Even Electron Ions

134 formula(e) evaluated with 1 results within limits (up to 50 closest results for each mass)

Elements Used:

C: 1-30 H: 1-25 N: 1-6 O: 1-6 S: 1-2

NI-310 44 (1.692)

1: TOF MS ES+

3.24e+004

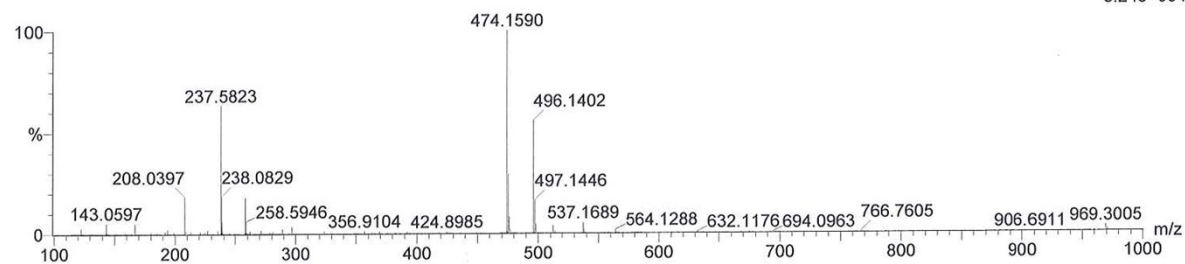

Minimum: -1.5  
Maximum: 5.0 5.0 50.0

| Mass     | Calc. Mass | mDa  | PPM  | DBE  | i-FIT | i-FIT (Norm) | Formula         |
|----------|------------|------|------|------|-------|--------------|-----------------|
| 474.1590 | 474.1600   | -1.0 | -2.1 | 16.5 | 111.5 | 0.0          | C25 H24 N5 O3 S |

Figure S28. Spectral data of Compound 10a

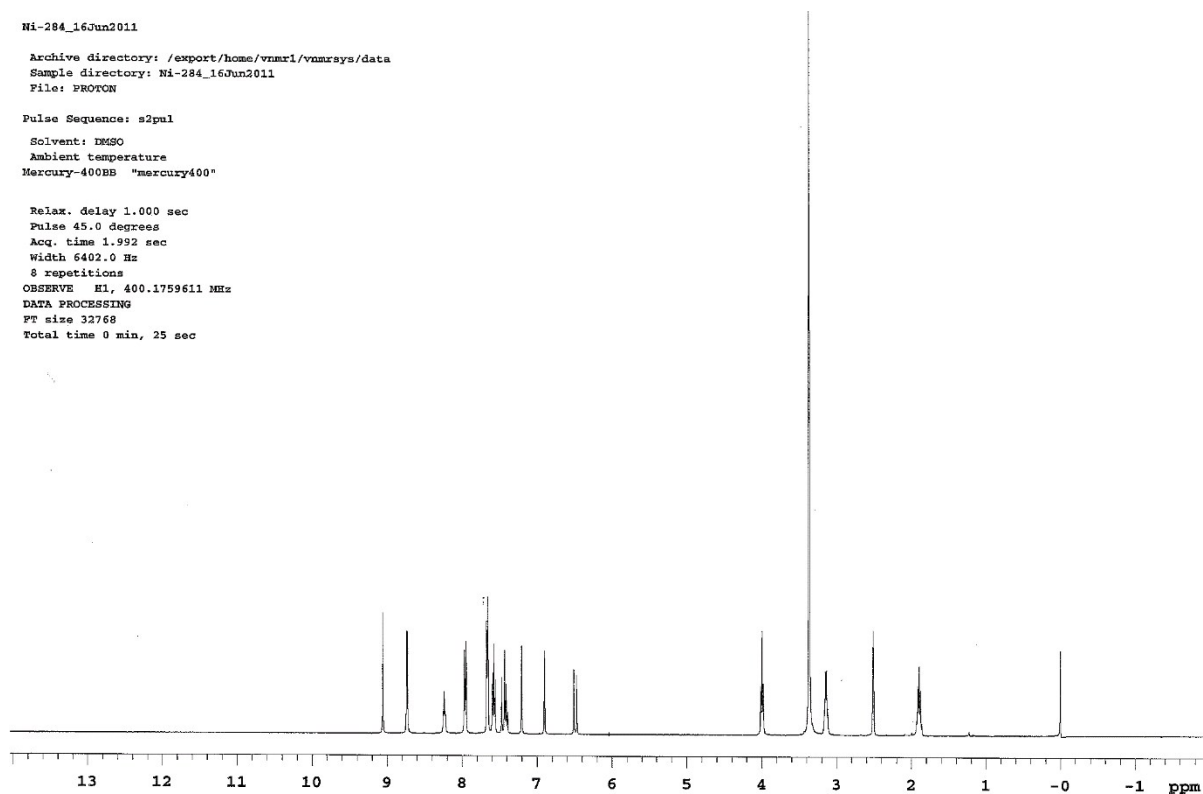

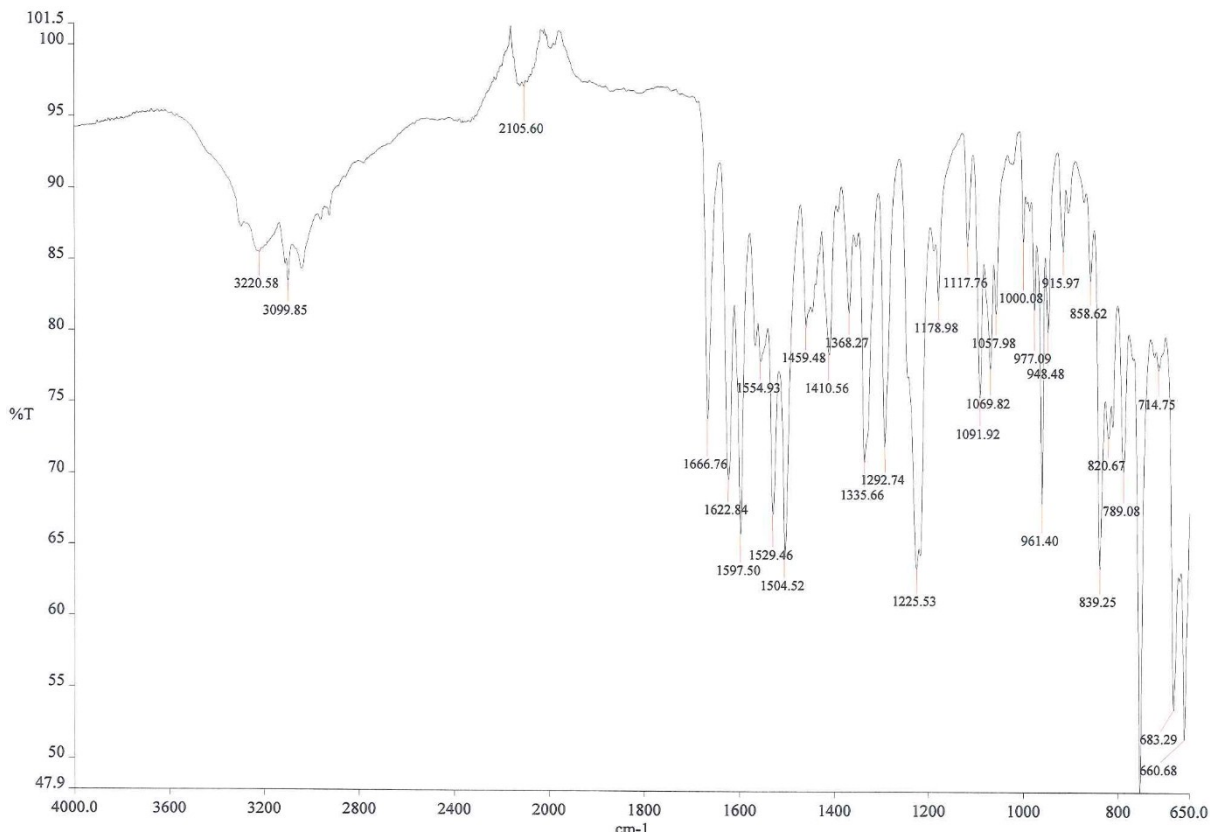

**Elemental Composition Report**

**Single Mass Analysis**

Tolerance = 5.0 PPM / DBE: min = -1.5, max = 50.0

Element prediction: Off

Number of isotope peaks used for i-FIT = 3

Monoisotopic Mass, Even Electron Ions

75 formula(e) evaluated with 1 results within limits (up to 50 closest results for each mass)

Elements Used:

C: 1-27 H: 1-33 N: 1-6 O: 1-5

NI-284 42 (1.636) Cm (41:44)

1: TOF MS ES+

4.04e+005

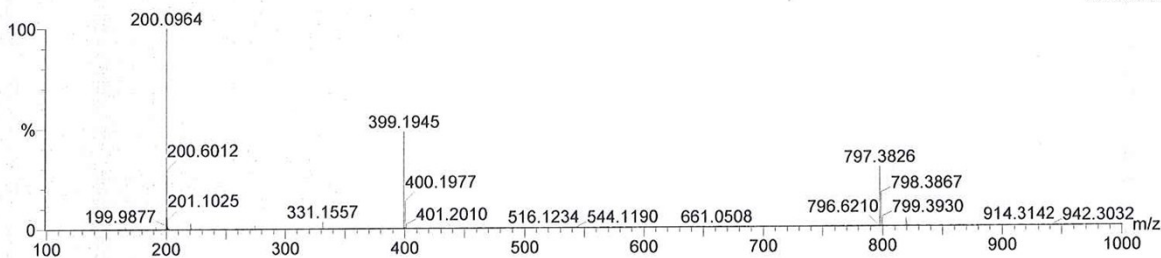

Minimum: -1.5  
Maximum: 5.0 5.0 50.0

| Mass     | Calc. Mass | mDa | PPM | DBE  | i-FIT | i-FIT (Norm) | Formula      |
|----------|------------|-----|-----|------|-------|--------------|--------------|
| 399.1945 | 399.1933   | 1.2 | 3.0 | 15.5 | 497.9 | 0.0          | C23 H23 N6 O |

**Figure S29.** Spectral data of Compound **10b**

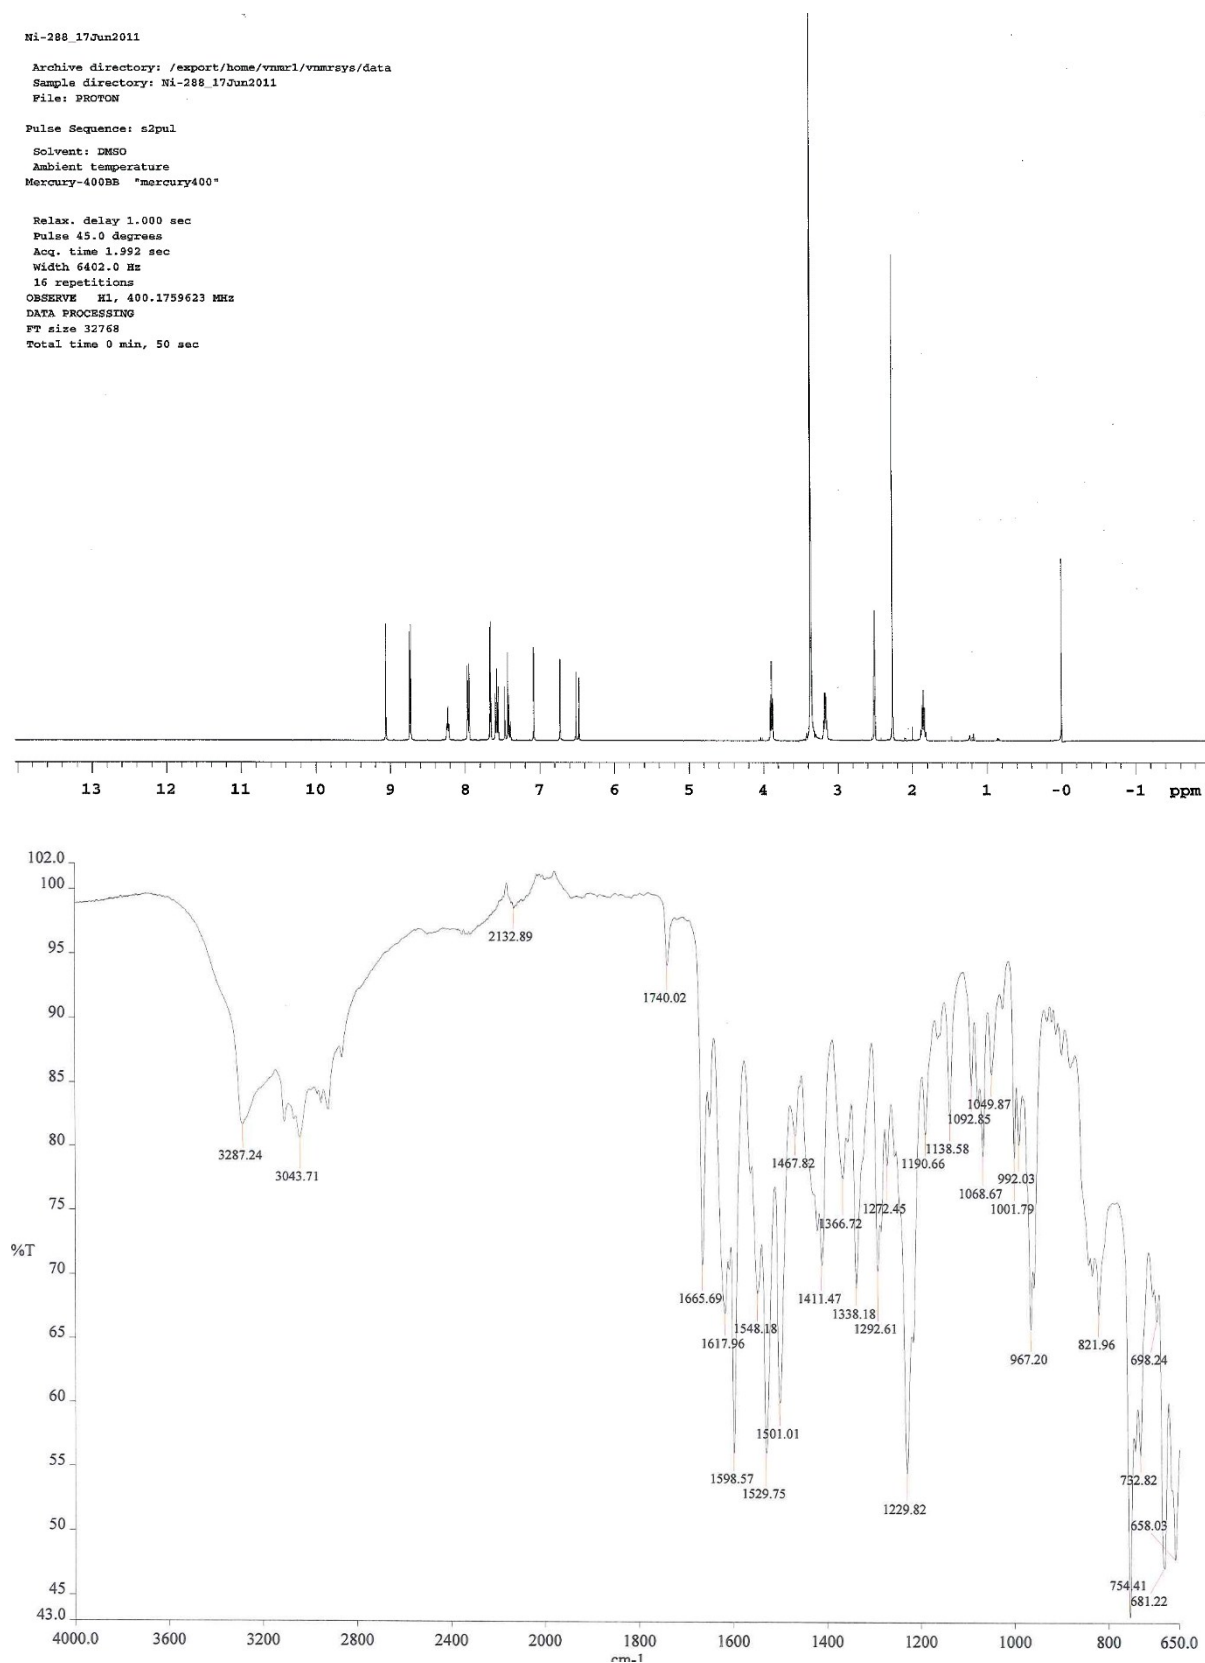



Single Mass Analysis

Tolerance = 5.0 PPM / DBE: min = -1.5, max = 50.0

Element prediction: Off

Number of isotope peaks used for i-FIT = 3

Monoisotopic Mass, Even Electron Ions

180 formula(e) evaluated with 1 results within limits (up to 50 closest results for each mass)

Elements Used:

C: 1-25 H: 1-25 N: 1-8 O: 1-6 Ni: 0-1

NI288 44 (1.696) Cm (44:46)

1: TOF MS ES+

1.37e+005

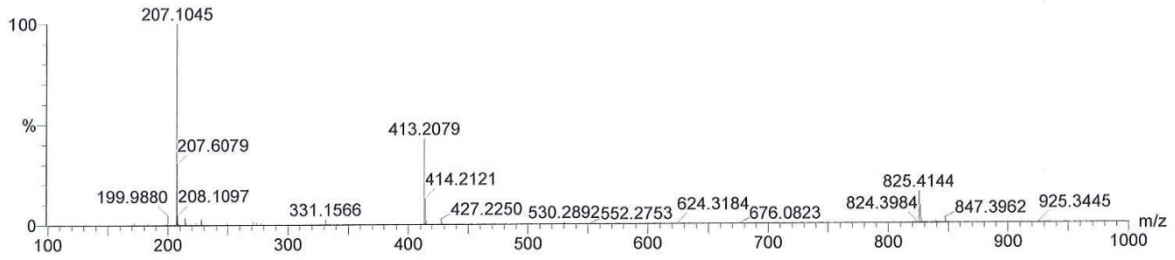

Minimum:

Maximum: 5.0 5.0 -1.5

50.0

| Mass     | Calc. Mass | mDa  | PPM  | DBE  | i-FIT | i-FIT (Norm) | Formula      |
|----------|------------|------|------|------|-------|--------------|--------------|
| 413.2079 | 413.2090   | -1.1 | -2.7 | 15.5 | 283.8 | 0.0          | C24 H25 N6 O |

**Figure S30.** Spectral data of Compound 10c

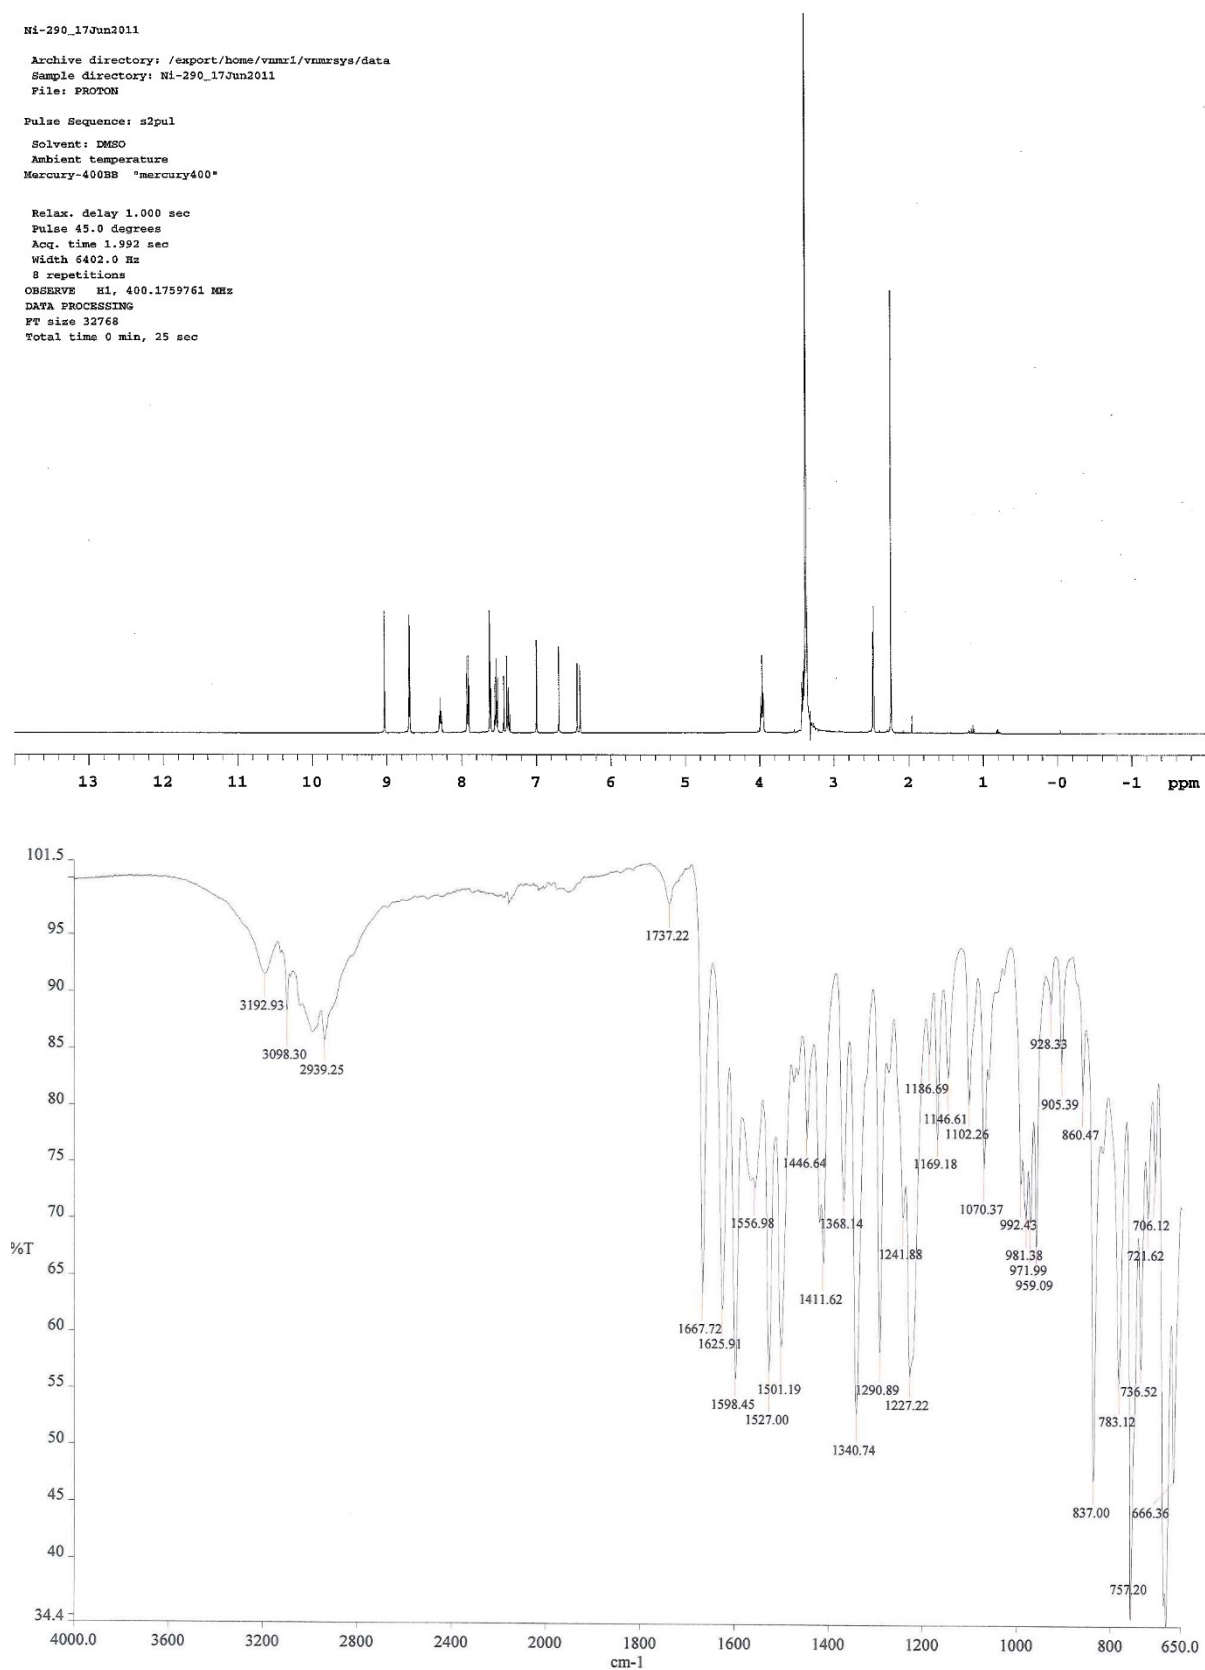

Single Mass Analysis

Tolerance = 5.0 PPM / DBE: min = -1.5, max = 50.0

Element prediction: Off

Number of isotope peaks used for i-FIT = 3

Monoisotopic Mass, Even Electron Ions

189 formula(e) evaluated with 1 results within limits (up to 50 closest results for each mass)

Elements Used:

C: 1-25 H: 1-25 N: 1-8 O: 1-6 Ni: 0-1

NI290 41 (1.602) Cm (41:44)

1: TOF MS ES+

2.85e+005

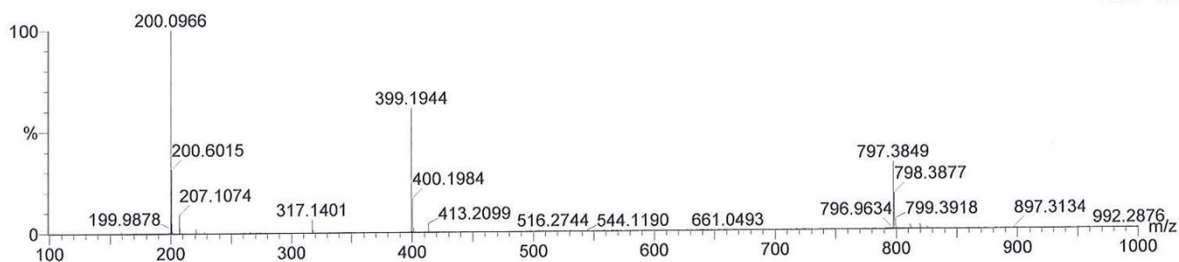

Minimum: -1.5  
Maximum: 5.0 5.0 50.0

| Mass     | Calc. Mass | mDa | PPM | DBE  | i-FIT | i-FIT (Norm) | Formula      |
|----------|------------|-----|-----|------|-------|--------------|--------------|
| 399.1944 | 399.1933   | 1.1 | 2.8 | 15.5 | 445.6 | 0.0          | C23 H23 N6 O |

Figure S31. Spectral data of Compound 10d

Ni-281\_19Jun2011

Archive directory: /export/home/vnmr1/vnmrsys/data  
Sample directory: Ni-281\_19Jun2011  
File: PROTON

Pulse Sequence: s2pul

Solvent: DMSO  
Ambient temperature  
Mercury-400BB "mercury400"

Relax. delay 1.000 sec  
Pulse 45.0 degrees  
Acq. time 1.992 sec  
Width 6402.0 Hz  
16 repetitions  
OBSERVE H1, 400.1759611 MHz  
DATA PROCESSING  
FT size 32768  
Total time 0 min, 50 sec

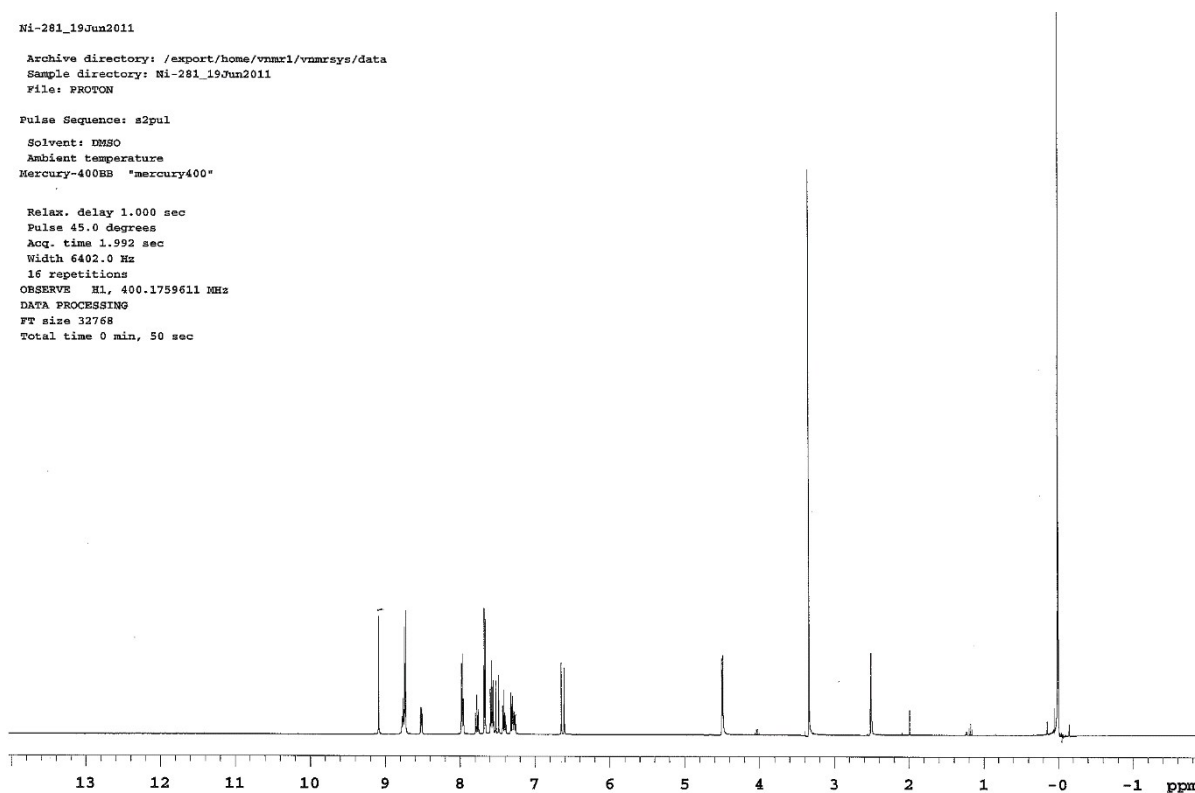

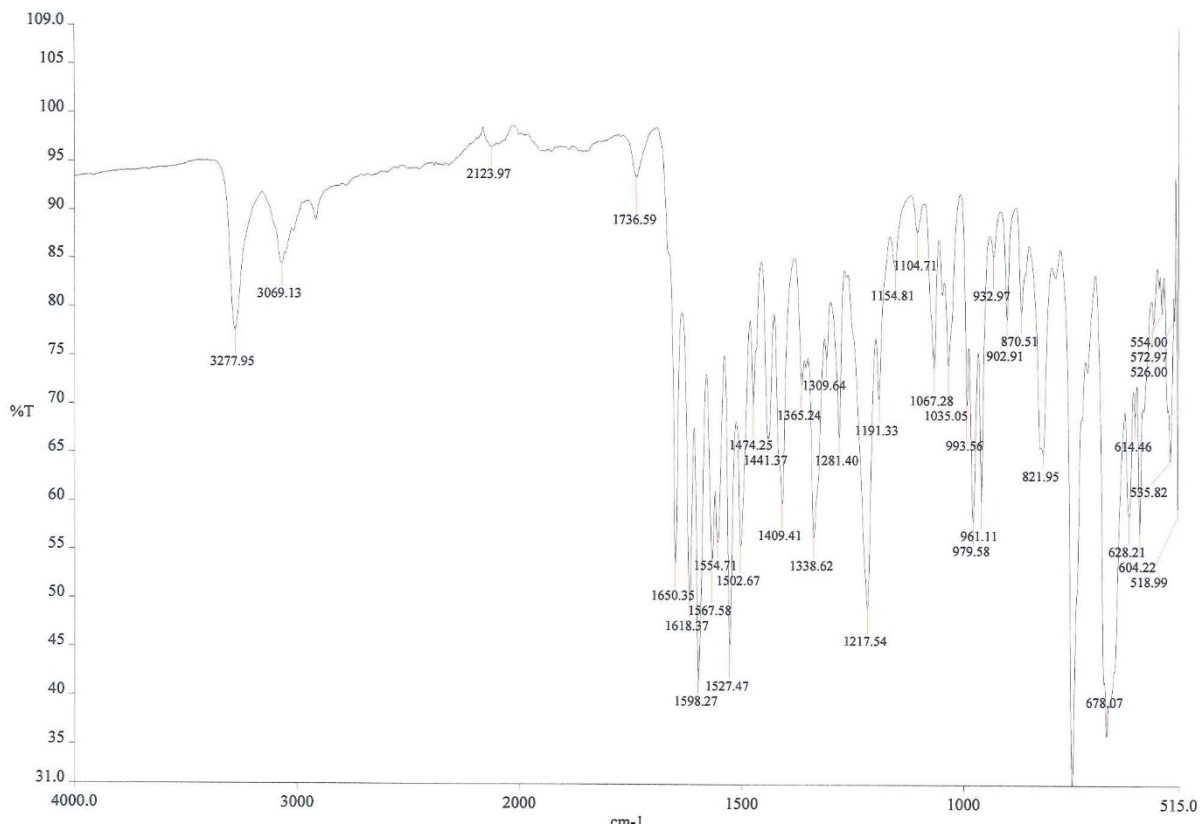

**Elemental Composition Report**

**Single Mass Analysis**

Tolerance = 5.0 PPM / DBE: min = -1.5, max = 50.0

Element prediction: Off

Number of isotope peaks used for i-FIT = 3

Monoisotopic Mass, Even Electron Ions

77 formula(e) evaluated with 2 results within limits (up to 50 closest results for each mass)

Elements Used:

C: 1-27 H: 1-33 N: 1-6 O: 1-5

NI-281 45 (1.762) Cm (43:45)

1: TOF MS ES+

1.62e+005

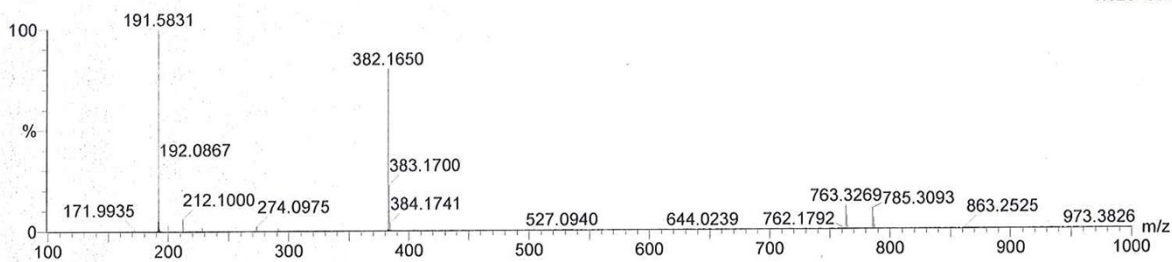

Minimum: -1.5  
Maximum: 5.0 5.0 50.0

| Mass     | Calc. Mass | mDa  | PPM  | DBE  | i-FIT | i-FIT (Norm) | Formula      |
|----------|------------|------|------|------|-------|--------------|--------------|
| 382.1650 | 382.1654   | -0.4 | -1.0 | 11.5 | 387.1 | 2.0          | C22 H24 N O5 |
|          | 382.1668   | -1.8 | -4.7 | 16.5 | 385.2 | 0.1          | C23 H20 N5 O |

**Figure S32.** Spectral data of Compound 10e

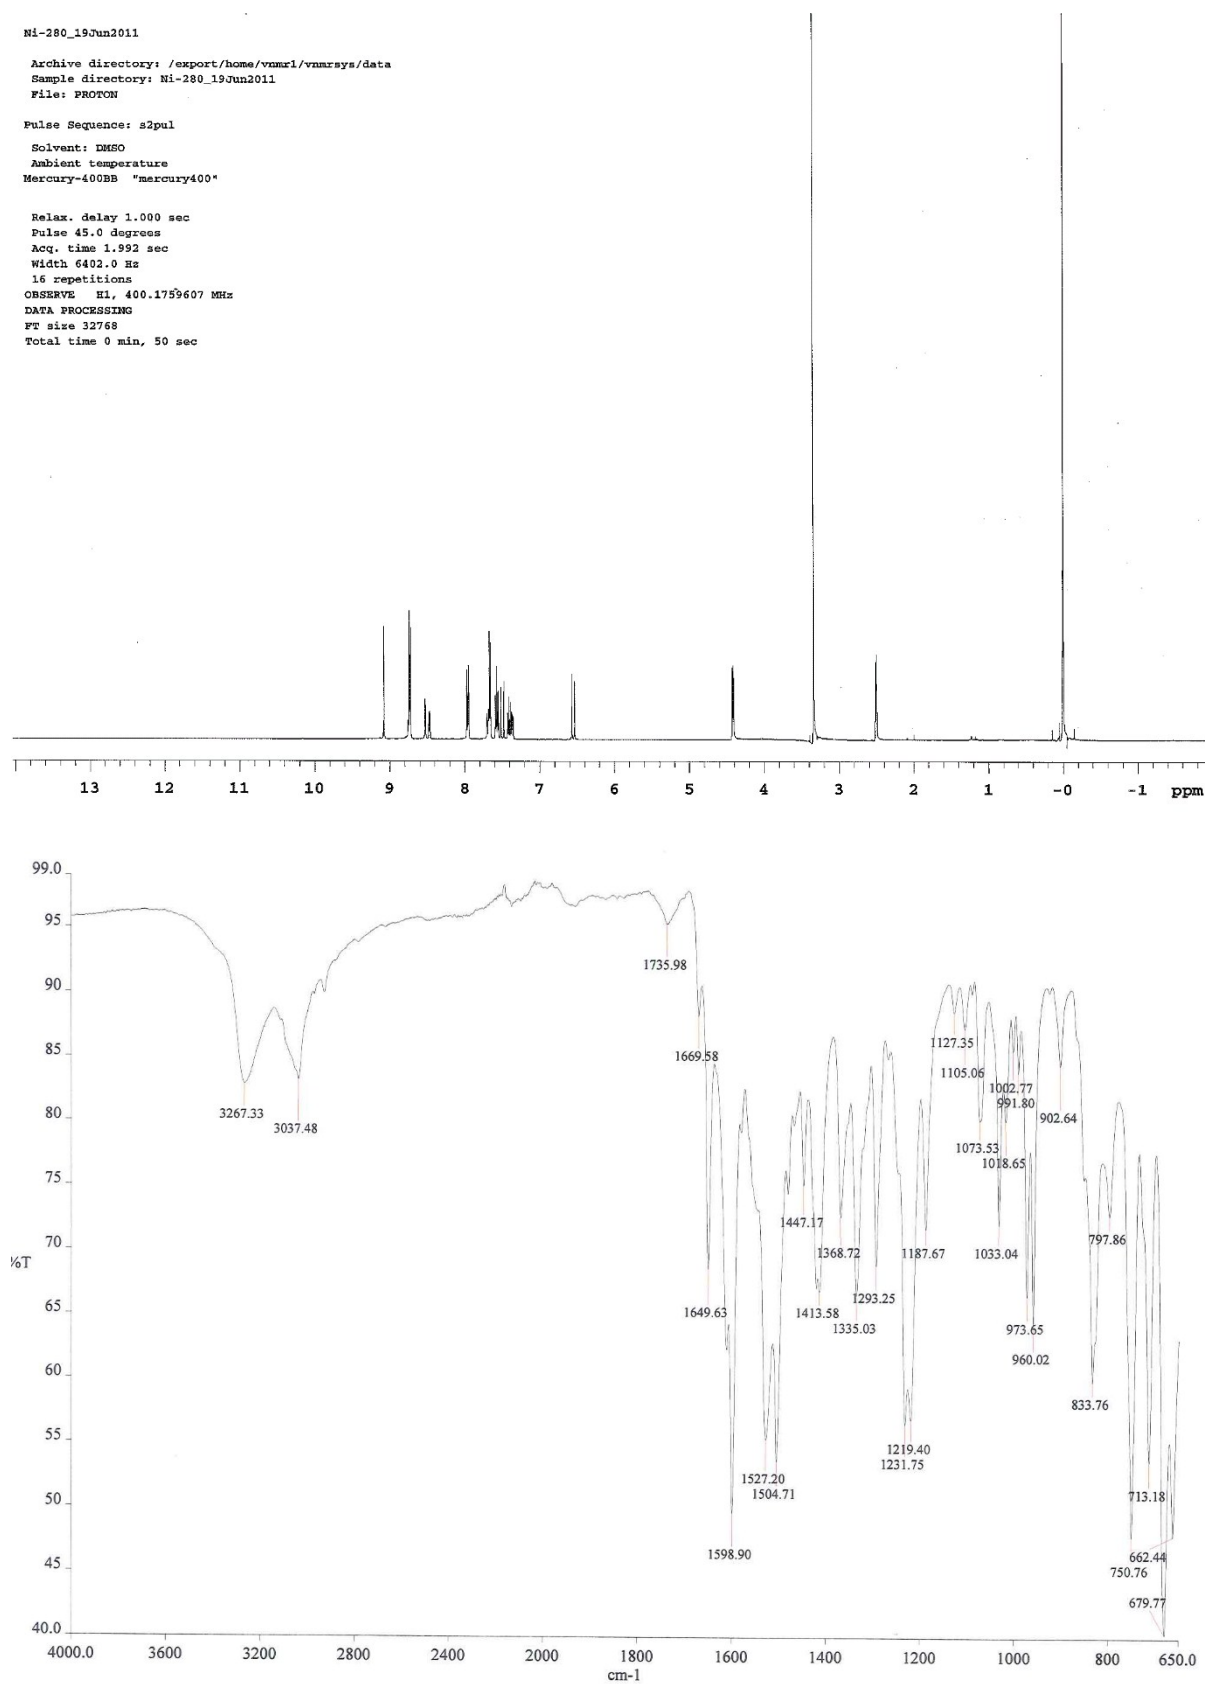

Single Mass Analysis

Tolerance = 5.0 PPM / DBE: min = -1.5, max = 50.0

Element prediction: Off

Number of isotope peaks used for i-FIT = 3

Monoisotopic Mass, Even Electron Ions

77 formula(e) evaluated with 2 results within limits (up to 50 closest results for each mass)

Elements Used:

C: 1-27 H: 1-33 N: 1-6 O: 1-5

NI-280X 44 (1.697) Cm (44:46)

1: TOF MS ES+

1.49e+005

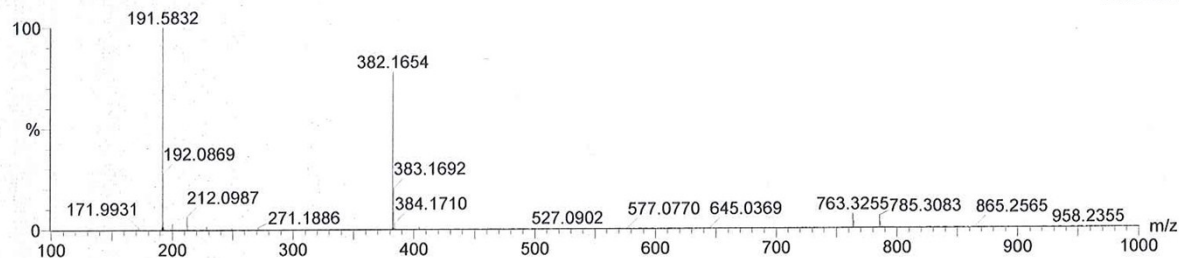

Minimum: -1.5  
Maximum: 5.0 5.0 50.0

| Mass     | Calc. Mass | mDa  | PPM  | DBE  | i-FIT | i-FIT (Norm) | Formula      |
|----------|------------|------|------|------|-------|--------------|--------------|
| 382.1654 | 382.1654   | 0.0  | 0.0  | 11.5 | 372.2 | 0.0          | C22 H24 N O5 |
|          | 382.1668   | -1.4 | -3.7 | 16.5 | 376.2 | 4.1          | C23 H20 N5 O |

Figure S33. Spectral data of Compound 10f

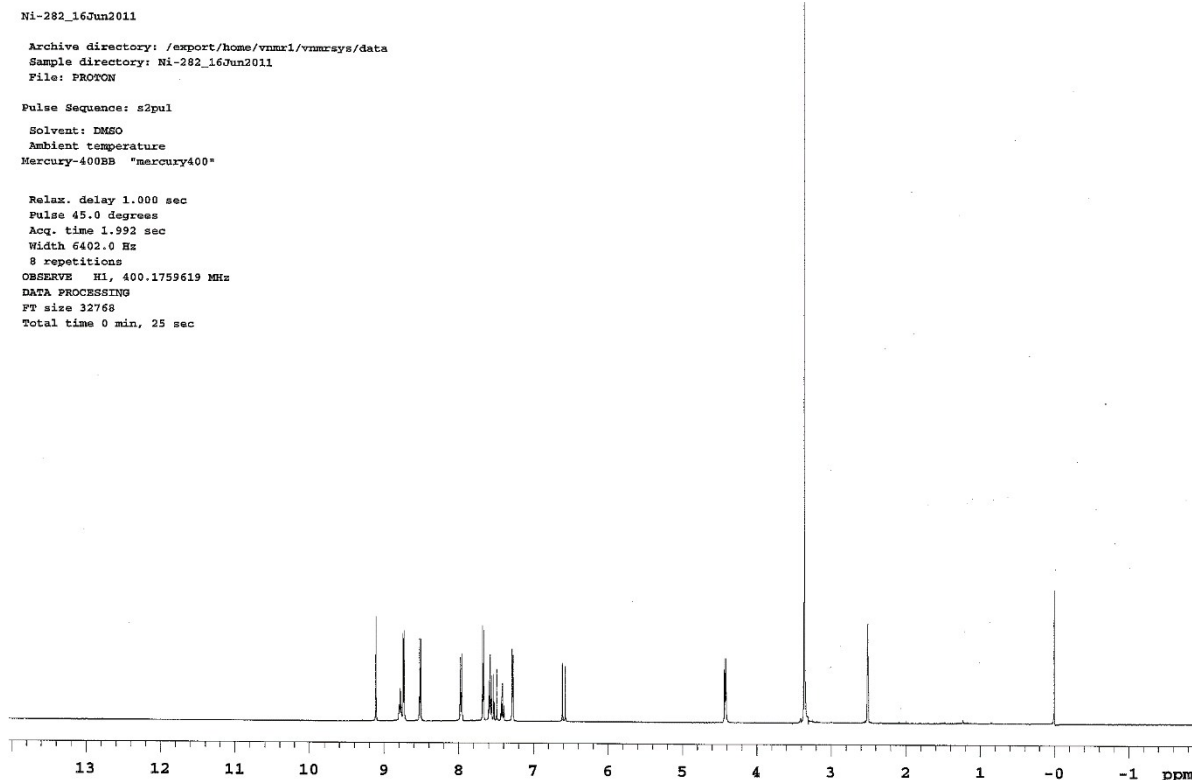

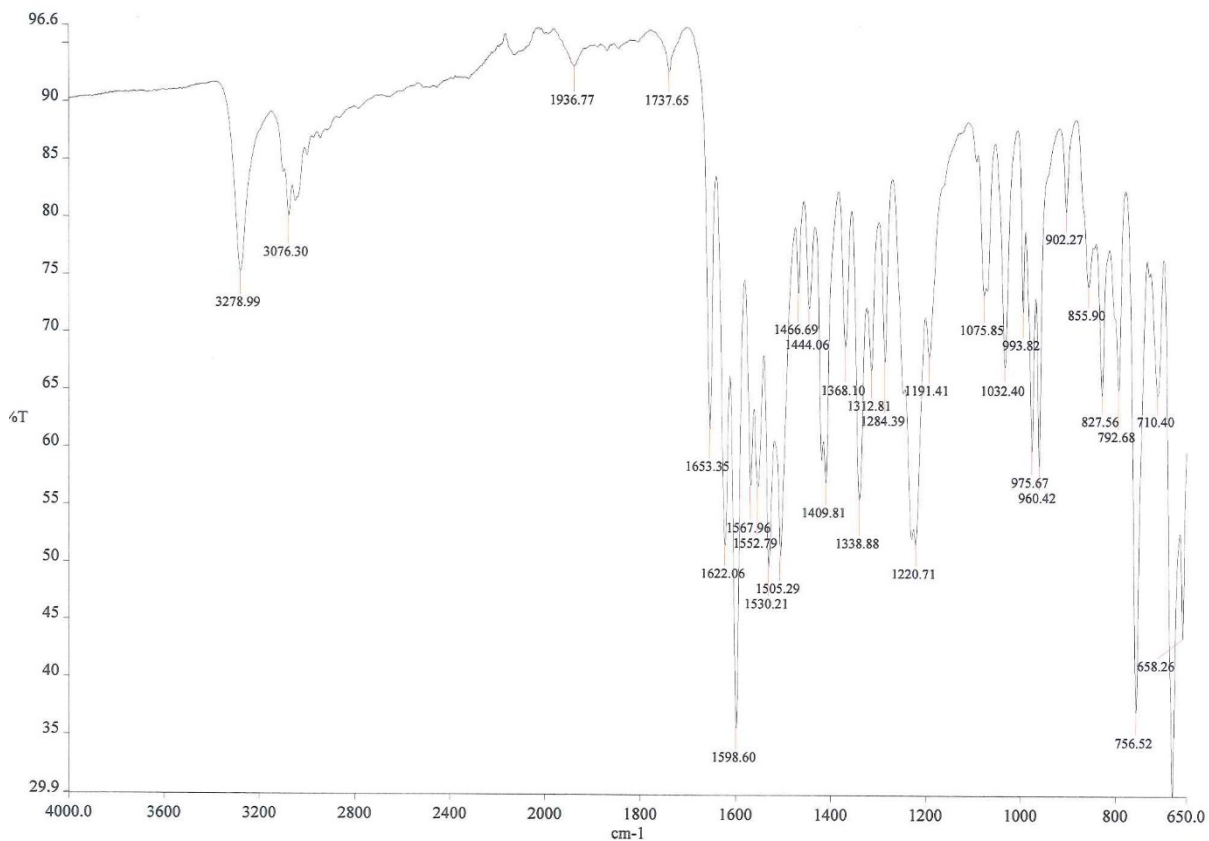

**Elemental Composition Report**

**Single Mass Analysis**

Tolerance = 5.0 PPM / DBE: min = -1.5, max = 50.0

Element prediction: Off

Number of isotope peaks used for i-FIT = 3

Monoisotopic Mass, Even Electron Ions

77 formula(e) evaluated with 2 results within limits (up to 50 closest results for each mass)

Elements Used:

C: 1-27 H: 1-33 N: 1-6 O: 1-5

NI-282 43 (1.665) Cm (43:45)

1: TOF MS ES+

1.84e+005

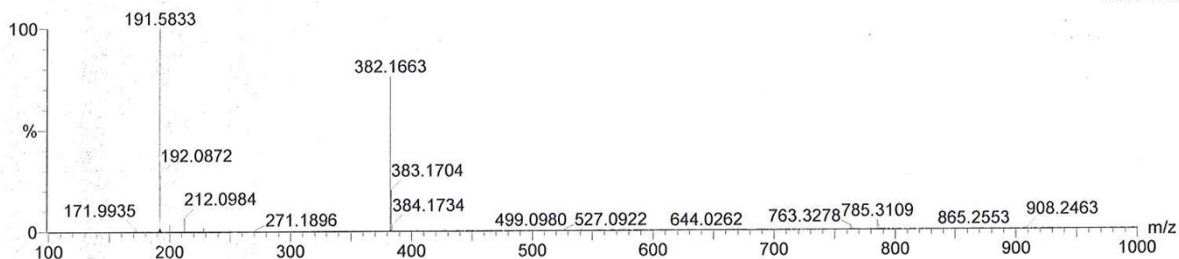

Minimum: -1.5  
Maximum: 5.0 5.0 50.0

| Mass     | Calc. Mass | mDa  | PPM  | DBE  | i-FIT | i-FIT (Norm) | Formula      |
|----------|------------|------|------|------|-------|--------------|--------------|
| 382.1663 | 382.1668   | -0.5 | -1.3 | 16.5 | 456.6 | 0.7          | C23 H20 N5 O |
|          | 382.1654   | 0.9  | 2.4  | 11.5 | 456.6 | 0.7          | C22 H24 N O5 |

**Figure S34.** Spectral data of Compound **10g**

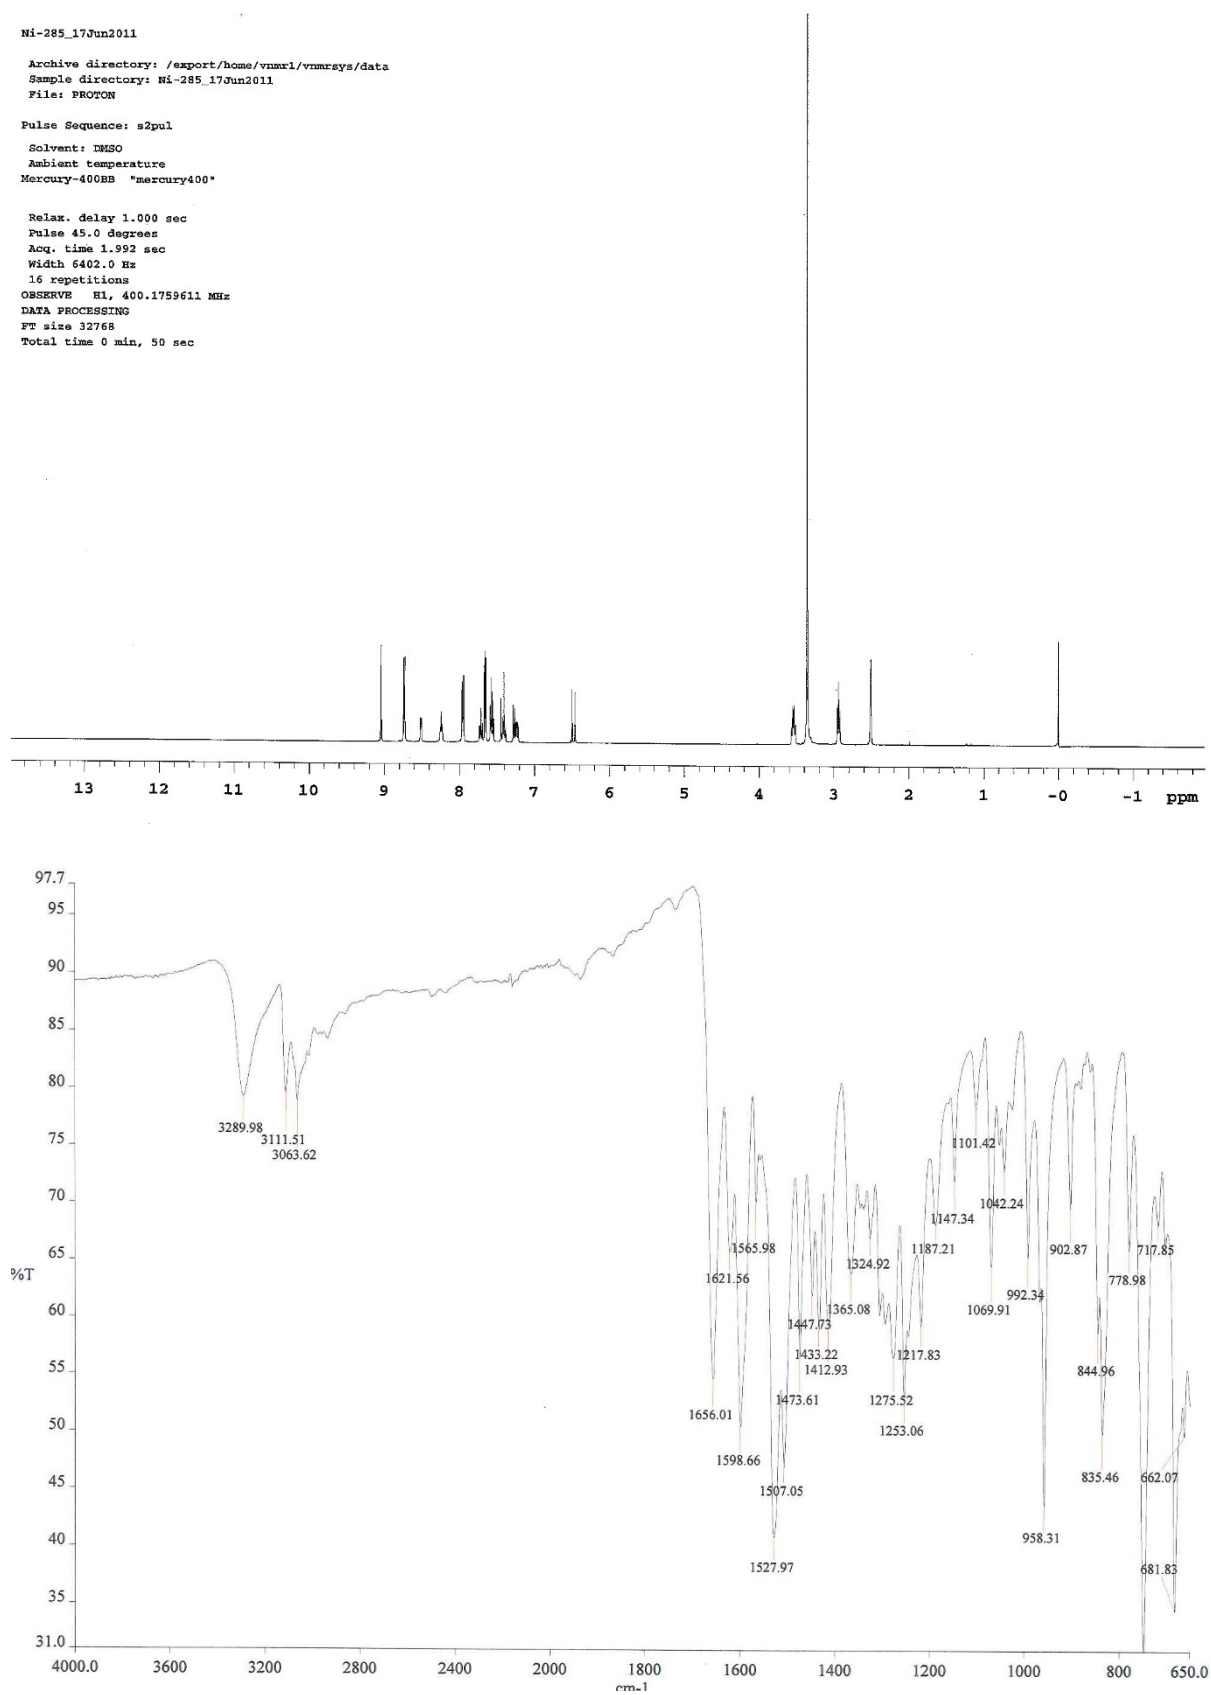



## Elemental Composition Report

### Single Mass Analysis

Tolerance = 5.0 PPM / DBE: min = -1.5, max = 50.0

Element prediction: Off

Number of isotope peaks used for i-FIT = 3

Monoisotopic Mass, Even Electron Ions

72 formula(e) evaluated with 2 results within limits (up to 50 closest results for each mass)

Elements Used:

C: 1-27 H: 1-33 N: 1-6 O: 1-5

NI-285 45 (1.765) Cm (45:49)

1: TOF MS ES+

8.05e+004

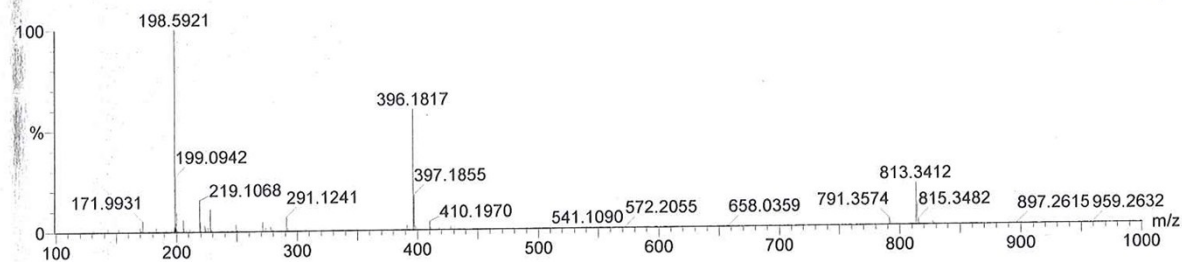

Minimum: -1.5  
Maximum: 5.0 5.0 50.0

| Mass     | Calc. Mass | mDa  | PPM  | DBE  | i-FIT | i-FIT (Norm) | Formula      |
|----------|------------|------|------|------|-------|--------------|--------------|
| 396.1817 | 396.1811   | 0.6  | 1.5  | 11.5 | 266.1 | 1.7          | C23 H26 N O5 |
|          | 396.1824   | -0.7 | -1.8 | 16.5 | 264.6 | 0.2          | C24 H22 N5 O |

Figure S35. Spectral data of Compound 10h

Ni-300\_17Jul2011

Archive directory: /export/home/vnmr1/vnmrsys/data  
Sample directory: Ni-300\_17Jul2011  
File: PROTON

Pulse Sequence: s2pul

Solvent: DMSO  
Ambient temperature  
Mercury-400BB "mercury400"

Relax. delay 1.000 sec  
Pulse 45.0 degrees  
Acq. time 1.992 sec  
Width 6402.0 Hz  
16 repetitions  
OBSERVE HL, 400.1759619 MHz  
DATA PROCESSING  
FT size 32768  
Total time 0 min, 50 sec

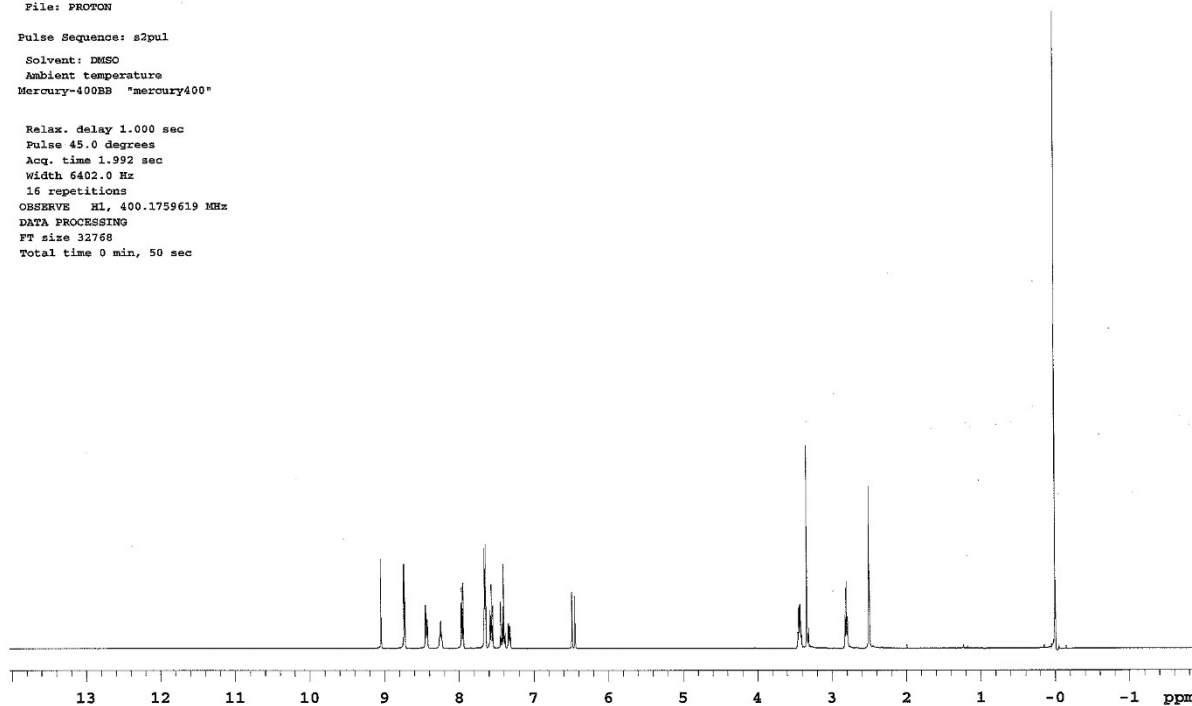

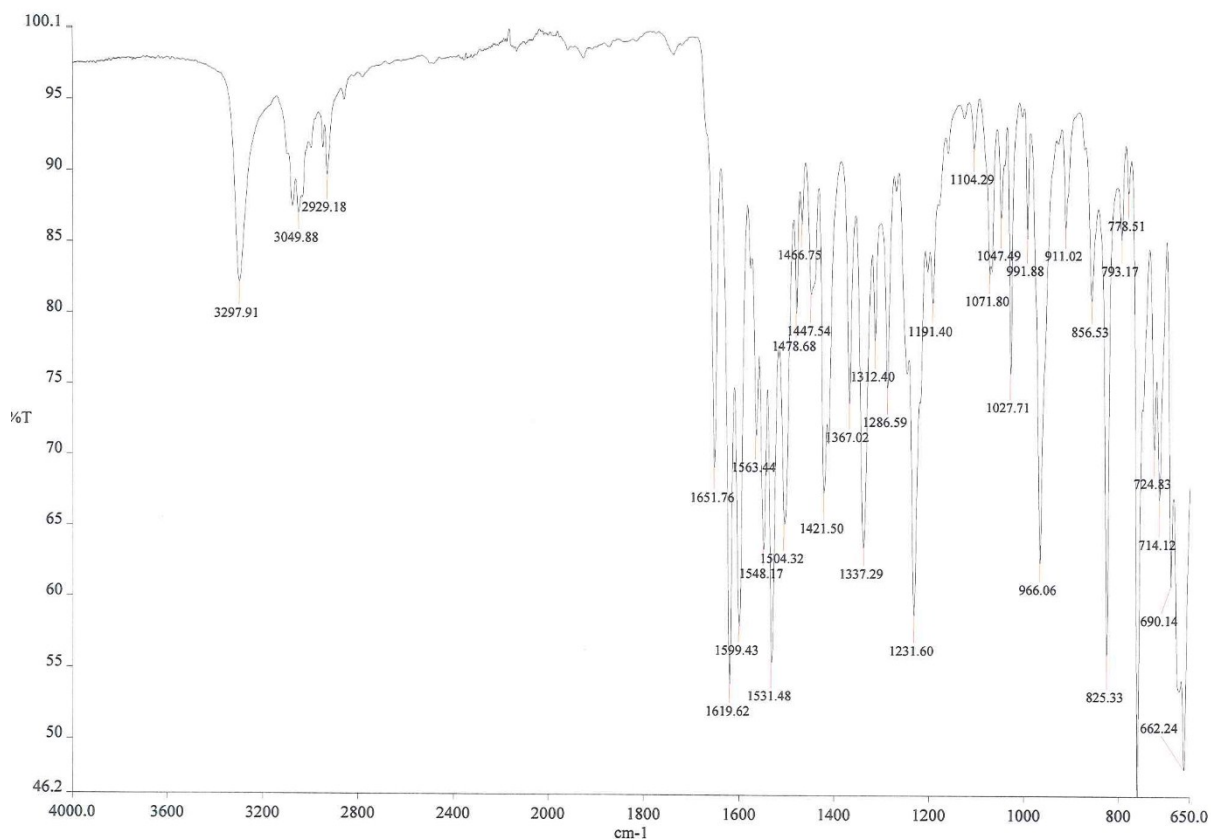

## Elemental Composition Report

Page 1 of 1

### Single Mass Analysis

Tolerance = 5.0 PPM / DBE: min = -1.5, max = 50.0

Element prediction: Off

Number of isotope peaks used for i-FIT = 3

Monoisotopic Mass, Even Electron Ions

45 formula(e) evaluated with 1 results within limits (up to 50 closest results for each mass)

Elements Used:

C: 1-25 H: 1-33 N: 1-6 O: 1-4

NI-300 44 (1.693) Cm (44:46)

1: TOF MS ES+

3.45e+005

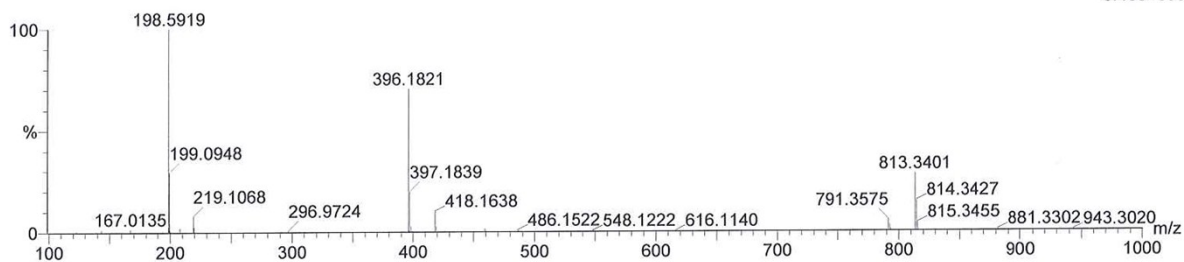

Minimum: -1.5  
Maximum: 5.0 5.0 50.0

| Mass     | Calc. Mass | mDa  | PPM  | DBE  | i-FIT | i-FIT (Norm) | Formula      |
|----------|------------|------|------|------|-------|--------------|--------------|
| 396.1821 | 396.1824   | -0.3 | -0.8 | 16.5 | 414.1 | 0.0          | C24 H22 N5 O |

**Figure S36.** Spectral data of Compound 10i

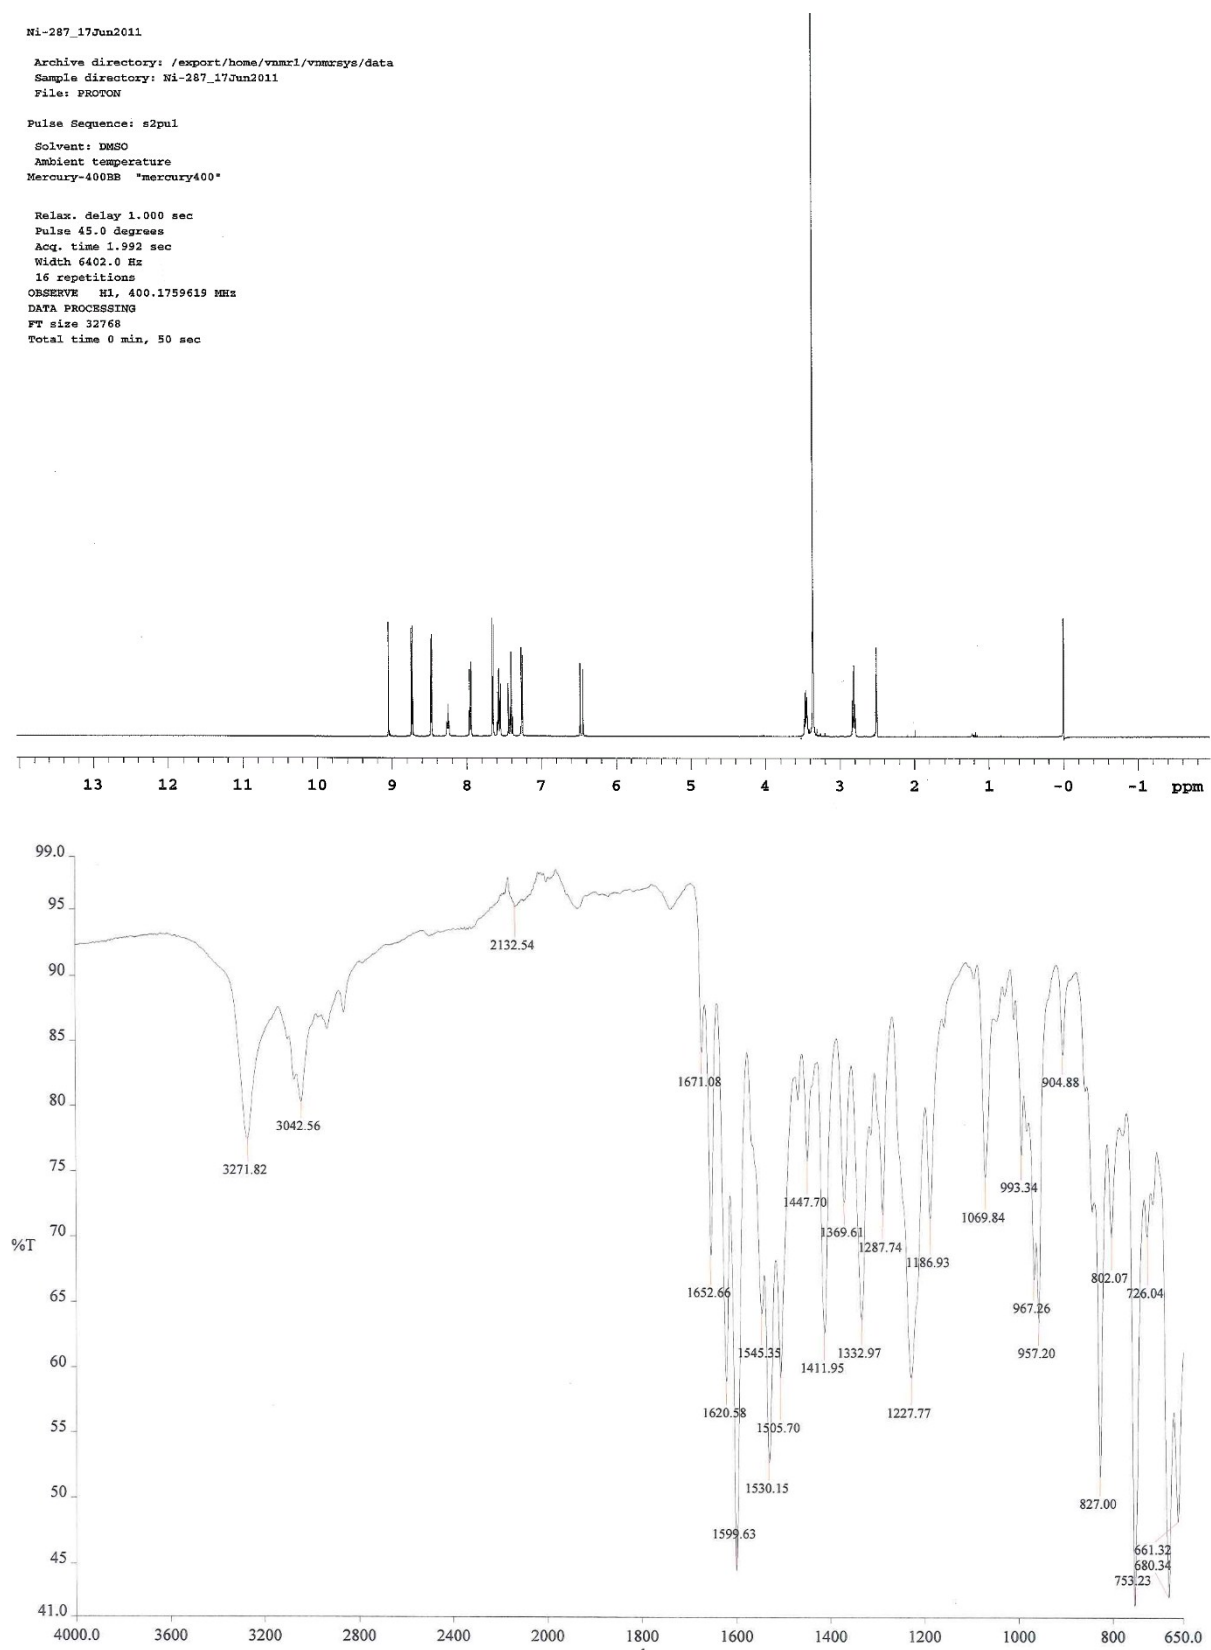

## Single Mass Analysis

Tolerance = 5.0 PPM / DBE: min = -1.5, max = 50.0

Element prediction: Off

Number of isotope peaks used for i-FIT = 3

Monoisotopic Mass, Even Electron Ions

177 formula(e) evaluated with 1 results within limits (up to 50 closest results for each mass)

Elements Used:

C: 1-25 H: 1-25 N: 1-8 O: 1-6 Ni: 0-1

Ni287 42 (1.632) Cm (42:44)

1: TOF MS ES+

2.12e+005

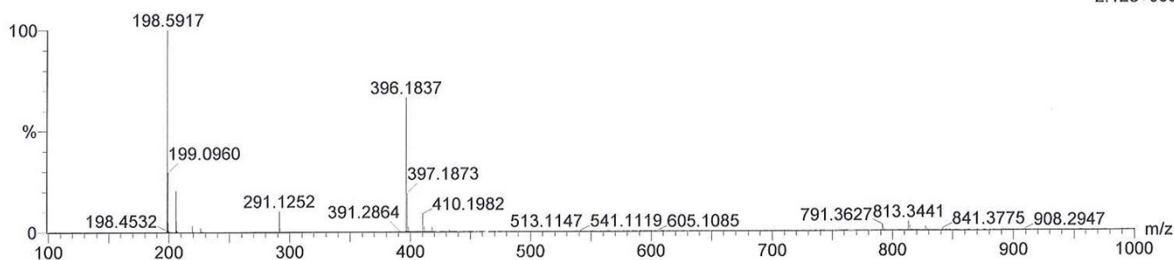

Minimum: -1.5  
 Maximum: 5.0 5.0 50.0

| Mass     | Calc. Mass | mDa | PPM | DBE  | i-FIT | i-FIT (Norm) | Formula      |
|----------|------------|-----|-----|------|-------|--------------|--------------|
| 396.1837 | 396.1824   | 1.3 | 3.3 | 16.5 | 432.5 | 0.0          | C24 H22 N5 O |

## References

- [1] S.N.I. Baytas, N.; Yılmaz, A.; , Synthesis, cytotoxicity and molecular properties prediction of novel 1,3-diarylpyrazole derivatives, *Med. Chem. Res.*, 22 (2013) 4893-4908
- [2] C.C. Chu, Teague, P. C., 4-Pyridylhydantoins, *J. Org. Chem.*, 23 (1958) 1578.
